# Supplementary material
Source: Royal Society of Chemistry journal article supplement (doi:10.1039/d6qo00384b)
Supplement: d6qo00384b1.pdf [file d6qo00384b1.pdf]

# Rh-Catalyzed [4 + 2] Benzannulation Enabling the Construction of Quinazoline-2,4-diones from Uracil and Ynamides

Yuan-Jie Meng,<sup>a</sup> Yang Li,<sup>a</sup> Wen-Rong Wu,<sup>a</sup> Xin-Xing Liu,<sup>a</sup> Xiang Liu,<sup>\*b</sup> Pengju Feng,<sup>\*a</sup> Shang-Shi Zhang<sup>\*a</sup>

<sup>a</sup>Center for Drug Research and Development, Guangdong Pharmaceutical University, Guangzhou, 510006, P. R. China.

<sup>b</sup>School of Chemistry and Chemical Engineering, Guangdong Pharmaceutical University, Guangzhou, 510006, P. R. China.

E-mail: [zhangshangshi@gdpu.edu.cn](mailto:zhangshangshi@gdpu.edu.cn).

E-mail: [fengpengju@gdpu.edu.cn](mailto:fengpengju@gdpu.edu.cn).

E-mail: [liux96@gdpu.edu.cn](mailto:liux96@gdpu.edu.cn).

|                                                            |     |
|------------------------------------------------------------|-----|
| 1. General information .....                               | S2  |
| 2. Synthesis of substrates <b>1</b> and <b>2</b> .....     | S3  |
| 3. General procedure and characterization of products..... | S4  |
| 4. Scale-up experiment and synthetic applications .....    | S19 |
| 5. Mechanistic studies .....                               | S25 |
| 6. Single-Crystal X-ray of <b>3s</b> .....                 | S28 |
| 7. NMR Spectra for New Compounds .....                     | S40 |
| 8 Reference .....                                          | S79 |

## 1. General information

Unless otherwise noted, all reactions were carried out at room temperature under an atmosphere of nitrogen with flame-dried glassware. If reaction was not conducted at room temperature, reaction temperatures are reported as the temperature of the bath surrounding the vessel unless otherwise stated. The dry solvents used were purified by distillation over the drying agents indicated in parentheses and were transferred under nitrogen: THF (Na-benzophenone), 1,2-dichloroethane (CaH<sub>2</sub>), dichloromethane (CaH<sub>2</sub>). Anhydrous CF<sub>3</sub>CH<sub>2</sub>OH, MeCN, DMF and MeOH were purchased from Acros Organics and stored under nitrogen atmosphere. Commercially available chemicals were obtained from commercial suppliers and used without further purification unless otherwise stated.

Proton NMR (<sup>1</sup>H) were recorded at 400 MHz, and Carbon NMR (<sup>13</sup>C) at 101 MHz NMR spectrometer unless otherwise stated. The following abbreviations are used for the multiplicities: s: singlet, d: doublet, t: triplet, q: quartet, m: multiplet, br s: broad singlet for proton spectra. Coupling constants (*J*) are reported in Hertz (Hz).

High-resolution mass spectra HRMS-ESI (TOF) was recorded on a BRUKER VPEXII spectrometer with EI and ESI mode unless otherwise stated.

Analytical thin layer chromatography was performed on Polygram SIL G/UV<sub>254</sub> plates. Visualization was accomplished with short wave UV light, or KMnO<sub>4</sub> staining solutions followed by heating. Flash column chromatography was performed using silica gel (200-300 mesh) with solvents distilled prior to use.

No attempts were made to optimize yields for substrate synthesis.

## 2. Synthesis of substrates 1 and 2

The substrates of 6-Methyluracil-5-carbaldehyde derivatives **1** were prepared according to the previous procedure.<sup>[1]</sup> The substrates of ynamides **2** were prepared according to the previous procedure.<sup>[2]</sup> All the characteristic data are consistent with the data reported before.

### 3. General procedure and characterization of products

#### (a) General procedure A

In an oven-dried Schlenk tube, a mixture of the 6-Methyluracil-5-carbaldehyde derivatives **1** (0.1 mmol, 1.0 equiv), ynamides **2** (0.2 mmol, 2.0 equiv), [Cp\*Rh(MeCN)<sub>3</sub>](SbF<sub>6</sub>)<sub>2</sub> (5.0 mol%), CsOPiv (0.1 mmol, 1.0 equiv) and Toluene (0.5 mL, 0.2 M) was stirred at 80 °C in the oil bath for 8.0 h. The reaction mixture was then diluted with DCM (10.0 mL) and washed with H<sub>2</sub>O. The aqueous phase was extracted with DCM again. The organic layers were combined, washed with brine and dried over Na<sub>2</sub>SO<sub>4</sub>. The pure product was purified by flash column chromatography on silica with an appropriate solvent to afford the pure product **3** or **4**.

#### (b) Characterization of products

##### *N*-(1,3-bis(ethoxymethyl)-2,4-dioxo-6-phenyl-1,2,3,4-tetrahydroquinazolin-7-yl)-*N*-methylethanesulfonamide (**3a**)

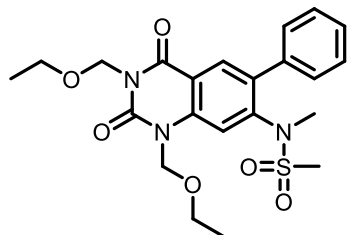

Following the above procedure A, the product **3a** was obtained in 72% yield (66.5 mg, 0.142 mmol, 8.0 h) as a yellow oil after column chromatography (eluent = Petroleum ether/EtOAc 2:1 v/v).  $R_f$ (Petroleum ether/EtOAc 2:1): 0.20. <sup>1</sup>H NMR (400 MHz, CDCl<sub>3</sub>)

$\delta$  8.23 (s, 1H), 7.52 (s, 1H), 7.49 – 7.37 (m, 5H), 5.64 (s, 2H), 5.58 (s, 2H), 3.71 (qd,  $J = 7.0, 2.0$  Hz, 4H), 3.14 (s, 3H), 2.58 (s, 3H), 1.23 (td,  $J = 7.0, 3.7$  Hz, 6H). <sup>13</sup>C NMR (101 MHz, CDCl<sub>3</sub>)  $\delta$  161.24, 151.31, 145.84, 139.64, 137.77, 137.40, 131.67, 129.14, 128.60, 128.12, 115.44, 115.18, 73.95, 71.18, 65.98, 64.79, 38.91, 38.72, 15.23, 15.02. ESI-MS: calculate C<sub>20</sub>H<sub>17</sub>N<sub>2</sub>O<sub>2</sub> [M+H]<sup>+</sup> 317.1290; Found 317.1289. ESI-MS: calculated C<sub>22</sub>H<sub>28</sub>N<sub>3</sub>O<sub>6</sub>S [M+H]<sup>+</sup> 462.1699; Found 462.1698.

##### *N*-(1,3-bis((2-methoxyethoxy)methyl)-2,4-dioxo-6-phenyl-1,2,3,4-tetrahydroquinazolin-7-yl)-*N*-methylethanesulfonamide (**3b**)

Following the above procedure A, the product **3b** was obtained in 58% yield (60.4 mg, 0.116 mmol, 8.0 h) as a yellow oil after column chromatography (eluent = Petroleum ether/EtOAc 1:3 v/v).  $R_f$

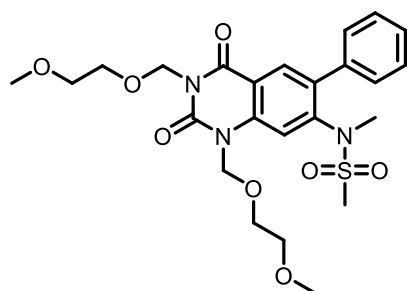

(Petroleum ether/EtOAc 1:3): 0.30.  $^1\text{H}$  NMR (400 MHz,  $\text{CDCl}_3$ )  $\delta$  8.21 (s, 1H), 7.51 (s, 1H), 7.47 – 7.37 (m, 5H), 5.67 (s, 2H), 5.62 (s, 2H), 4.00 – 3.74 (m, 4H), 3.53 (q,  $J = 4.9$  Hz, 4H), 3.34 (s, 3H), 3.32 (s, 3H), 3.14 (s, 3H), 2.56 (s, 3H).  $^{13}\text{C}$  NMR (101 MHz,  $\text{CDCl}_3$ )  $\delta$  161.23, 151.38, 145.92, 139.59, 137.77, 137.58, 131.63, 129.15, 128.59, 128.11, 115.46, 115.19, 74.29, 71.74, 71.42, 69.87, 68.35, 59.06, 38.86, 38.74. ESI-MS: calculated  $\text{C}_{24}\text{H}_{31}\text{N}_3\text{O}_8\text{SNa}$   $[\text{M}+\text{Na}]^+$  544.1730; Found 544.1733.

***N*-(1,3-dimethyl-2,4-dioxo-6-phenyl-1,2,3,4-tetrahydroquinazolin-7-yl)-*N*-methylmethanesulfonamide (3c)**

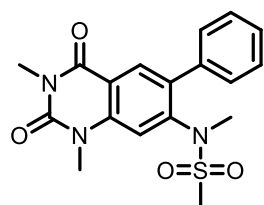

Following the above procedure A, the product **3c** was obtained in 54% yield (40.2 mg, 0.108 mmol, 8.0 h) as a yellow oil after column chromatography (eluent = Petroleum ether/EtOAc 1:1 v/v).  $R_f$ (Petroleum ether/EtOAc 1:1): 0.30.  $^1\text{H}$  NMR (400 MHz,  $\text{CDCl}_3$ )  $\delta$  8.23 (s, 1H), 7.48 – 7.36 (m, 5H), 7.25 (s, 1H), 3.64 (s, 3H), 3.50 (s, 3H), 3.17 (s, 3H), 2.46 (s, 3H).  $^{13}\text{C}$  NMR (101 MHz,  $\text{CDCl}_3$ )  $\delta$  161.25, 151.10, 145.51, 140.39, 137.97, 136.57, 131.57, 129.20, 128.60, 128.12, 115.05, 114.39, 39.09, 38.96, 31.08, 28.68. ESI-MS: calculated  $\text{C}_{18}\text{H}_{20}\text{N}_3\text{O}_4\text{S}$   $[\text{M}+\text{H}]^+$  374.1175; Found 374.1179.

***N*-(2,4-dioxo-6-phenyl-1,3-bis((2-(trimethylsilyl)ethoxy)methyl)-1,2,3,4-tetrahydroquinazolin-7-yl)-*N*-methylmethanesulfonamide (3d)**

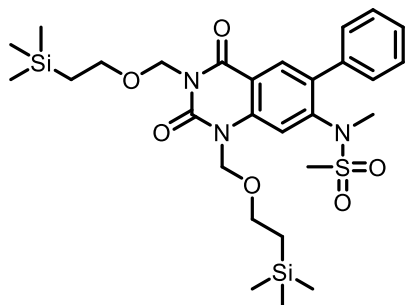

Following the above procedure A, the product **3d** was obtained in 54% yield (65.4 mg, 0.108 mmol, 8.0 h) as a yellow oil after column chromatography (eluent = Petroleum ether/EtOAc 4:1 v/v).  $R_f$ (Petroleum ether/EtOAc 4:1): 0.20.  $^1\text{H}$  NMR (400 MHz,  $\text{CDCl}_3$ )  $\delta$  8.22 (s, 1H), 7.49 (s, 1H), 7.47 – 7.37 (m, 5H), 5.62 (s, 2H), 5.55 (s, 2H), 3.72 (td,  $J = 9.1$ , 7.8 Hz, 4H), 3.13 (s, 3H), 2.57 (s, 3H), 1.03 – 0.79 (m, 4H), -0.00 (s, 9H), -0.01 (s, 9H).  $^{13}\text{C}$  NMR (101 MHz,  $\text{CDCl}_3$ )  $\delta$  161.29, 151.35, 145.85, 139.79, 137.90, 137.36, 131.77, 129.26, 128.69,

128.19, 115.48, 115.28, 73.75, 70.86, 67.74, 67.02, 39.07, 38.76, 18.29, 18.04, -1.20, -1.28. ESI-MS: calculated  $C_{28}H_{43}N_3O_6SSi_2Na$   $[M+Na]^+$  628.2309; Found 628.2307.

***N*-(1,3-dibenzyl-2,4-dioxo-6-phenyl-1,2,3,4-tetrahydroquinazolin-7-yl)-*N*-methylmethanesulfonamide (3e)**

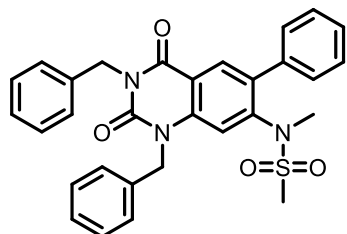

Following the above procedure A, the product **3e** was obtained in 36% yield (37.4 mg, 0.072 mmol, 8.0 h) as a yellow oil after column chromatography (eluent = Petroleum ether/EtOAc 2:1 v/v).  $R_f$ (Petroleum ether/EtOAc 2:1): 0.30.  $^1H$  NMR (400 MHz,  $CDCl_3$ )

$\delta$  8.24 (s, 1H), 7.52 (d,  $J = 7.0$  Hz, 2H), 7.46 – 7.36 (m, 3H), 7.37 – 7.32 (m, 5H), 7.31 (d,  $J = 4.8$  Hz, 2H), 7.28 (t,  $J = 3.5$  Hz, 3H), 7.13 (s, 1H), 5.41 (s, 2H), 5.35 (s, 2H), 2.92 (s, 3H), 2.34 (s, 3H).  $^{13}C$  NMR (101 MHz,  $CDCl_3$ )  $\delta$  161.01, 151.35, 145.34, 139.61, 137.70, 136.74, 136.64, 135.37, 131.89, 129.20, 129.08, 128.89, 128.56, 128.05, 127.98, 127.77, 126.65, 126.40, 115.35, 114.90, 47.67, 45.27, 38.56, 38.47. ESI-MS: calculated  $C_{30}H_{28}N_3O_4S$   $[M+H]^+$  526.1801; Found 526.1801.

***N*-(1,3-bis((benzyloxy)methyl)-2,4-dioxo-6-phenyl-1,2,3,4-tetrahydroquinazolin-7-yl)-*N*-methylmethanesulfonamide (3f)**

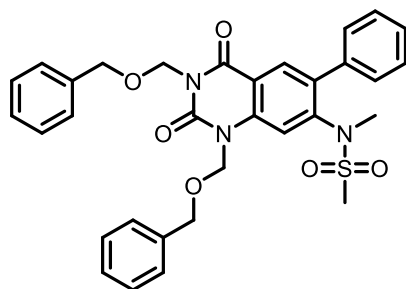

Following the above procedure A, the product **3f** was obtained in 48% yield (55.8 mg, 0.096 mmol, 8.0 h) as a yellow oil after column chromatography (eluent = Petroleum ether/EtOAc 2:1 v/v).  $R_f$ (Petroleum ether/EtOAc 2:1): 0.30.

$^1H$  NMR (400 MHz,  $CDCl_3$ )  $\delta$  8.19 (s, 1H), 7.50 (s, 1H), 7.48 – 7.36 (m, 8H), 7.34 – 7.27 (m, 7H), 5.71 (s, 2H), 5.63 (s, 2H), 4.73 (s, 2H), 4.70 (s, 2H), 3.13 (s, 3H), 2.52 (s, 3H).  $^{13}C$  NMR (101 MHz,  $CDCl_3$ )  $\delta$  161.16, 151.25, 145.83, 139.46, 137.75, 137.47, 137.01, 131.67, 129.21, 129.16, 128.63, 128.46, 128.36, 128.16, 128.10, 127.90, 127.79, 127.77, 115.51, 115.10, 73.84, 72.30, 71.41, 70.98, 38.97, 38.72. ESI-MS: calculated  $C_{32}H_{31}N_3O_6SNa$   $[M+Na]^+$  608.1831; Found 608.1835.

***N*-(1-(3-bromobenzyl)-3-(4-bromobenzyl)-2,4-dioxo-6-phenyl-1,2,3,4-tetrahydroquinazolin-7-yl)-*N*-methylmethanesulfonamide (3g)**

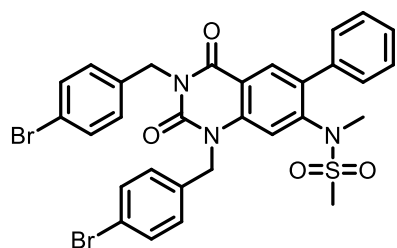

Following the above procedure A, the product **3g** was obtained in 50% yield (66.6 mg, 0.100 mmol, 8.0 h) as a yellow oil after column chromatography (eluent = Petroleum ether/EtOAc 2:1 v/v).  $R_f$ (Petroleum ether/EtOAc 2:1): 0.30.

$^1\text{H NMR}$  (400 MHz,  $\text{CDCl}_3$ )  $\delta$  8.16 (s, 1H), 7.43 (d,  $J = 8.4$  Hz, 2H), 7.40 – 7.34 (m, 5H), 7.33 – 7.27 (m, 4H), 7.26 (s, 1H), 7.13 (d,  $J = 8.4$  Hz, 2H), 5.28 (s, 2H), 5.20 (s, 2H), 2.89 (s, 3H), 2.34 (s, 3H).  $^{13}\text{C NMR}$  (101 MHz,  $\text{CDCl}_3$ )  $\delta$  160.96, 151.16, 145.57, 139.36, 137.49, 136.91, 135.48, 134.25, 132.22, 131.87, 131.60, 130.68, 128.97, 128.57, 128.47, 128.14, 121.88, 121.81, 115.08, 114.85, 46.98, 44.63, 38.57, 38.51. ESI-MS: calculated  $\text{C}_{30}\text{H}_{26}\text{Br}_2\text{N}_3\text{O}_4\text{S}$   $[\text{M}+\text{H}]^+$  682.0011; Found 682.0012.

**1,3-dimethyl-7-(2-oxopyrrolidin-1-yl)-6-phenyl-5-(trifluoromethyl)quinazolin-2,4(1H,3H)-dione (3h)**

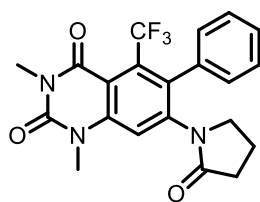

Following the above procedure A, the product **3h** was obtained in 25% yield (20.9 mg, 0.050 mmol, 8.0 h) as a yellow oil after column chromatography (eluent = Petroleum ether/EtOAc 1:3 v/v).  $R_f$ (Petroleum ether/EtOAc 1:3): 0.30.  $^1\text{H NMR}$  (400 MHz,  $\text{CDCl}_3$ )  $\delta$  7.44 – 7.39 (m,

3H), 7.38 (s, 1H), 7.28 – 7.24 (m, 2H), 3.63 (s, 3H), 3.49 (s, 3H), 2.96 (t,  $J = 6.9$  Hz, 2H), 2.32 (t,  $J = 8.0$  Hz, 2H), 1.74 (p,  $J = 7.3$  Hz, 2H).  $^{13}\text{C NMR}$  (101 MHz,  $\text{CDCl}_3$ )  $\delta$  175.93, 159.31, 150.56, 144.01, 141.65, 136.29 (d,  $J = 2.7$  Hz), 135.77, 131.03 (d,  $J = 31.8$  Hz), 128.79 (d,  $J = 1.9$  Hz), 128.45, 128.20, 122.82 (d,  $J = 277.6$  Hz), 118.15, 114.07, 49.91, 31.63, 30.75, 29.23, 19.20.  $^{19}\text{F NMR}$  (376 MHz,  $\text{CDCl}_3$ )  $\delta$  -50.31. ESI-MS: calculated  $\text{C}_{21}\text{H}_{19}\text{F}_3\text{N}_3\text{O}_3$   $[\text{M}+\text{H}]^+$  418.1379; Found 418.1382.

**Methyl 4-(1,3-bis((2-methoxyethoxy)methyl)-7-(N-methylmethylsulfonamido)-2,4-dioxo-1,2,3,4-tetrahydroquinazolin-6-yl)benzoate (3i)**

Following the above procedure A, the product **3i** was obtained in 56% yield (64.9 mg, 0.112 mmol, 8.0 h) as a yellow oil after column chromatography (eluent = Petroleum ether/EtOAc 1:3 v/v).  $R_f$

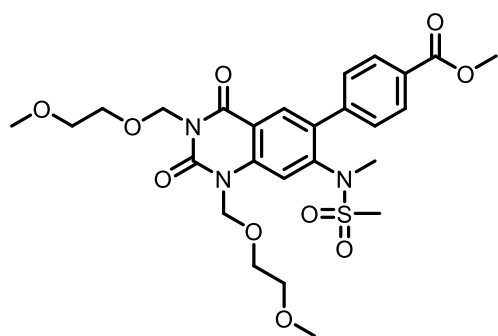

(Petroleum ether/EtOAc 1:3): 0.20.  $^1\text{H}$  NMR (400 MHz,  $\text{CDCl}_3$ )  $\delta$  8.21 (s, 1H), 8.15 – 8.07 (m, 2H), 7.51 (d,  $J = 2.8$  Hz, 2H), 7.49 (s, 1H), 5.68 (s, 2H), 5.61 (s, 2H), 3.93 (s, 3H), 3.85 – 3.75 (m, 4H), 3.54 – 3.50 (m, 4H), 3.32 (s, 3H), 3.32 (s, 3H), 3.13 (s, 3H), 2.67 (s, 3H).  $^{13}\text{C}$  NMR (101 MHz,  $\text{CDCl}_3$ )  $\delta$

166.70, 161.11, 151.29, 145.72, 142.34, 140.00, 136.60, 131.54, 129.80, 129.67, 129.24, 115.28, 115.23, 74.27, 71.79, 71.73, 71.38, 69.92, 68.35, 59.06, 59.04, 52.34, 38.72, 38.55. ESI-MS: calculated  $\text{C}_{26}\text{H}_{33}\text{N}_3\text{O}_{10}\text{SNa}$   $[\text{M}+\text{Na}]^+$  602.1784; Found 602.1785.

***N*-(1,3-bis((2-methoxyethoxy)methyl)-2,4-dioxo-6-(4-(trifluoromethyl)phenyl)-1,2,3,4-tetrahydroquinazolin-7-yl)-*N*-methylmethanesulfonamide (3j)**

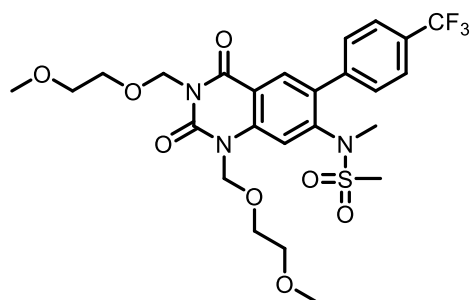

Following the above procedure A, the product **3j** was obtained in 48% yield (56.6 mg, 0.096 mmol, 8.0 h) as a yellow oil after column chromatography (eluent = Petroleum ether/EtOAc 1:3 v/v).  $R_f$  (Petroleum ether/EtOAc 1:3): 0.20.  $^1\text{H}$  NMR (400 MHz,  $\text{CDCl}_3$ )  $\delta$  8.22 (s, 1H), 7.72 (d,  $J = 8.1$  Hz, 2H), 7.57 (d,  $J = 8.1$

Hz, 2H), 7.53 (s, 1H), 5.68 (s, 2H), 5.62 (s, 2H), 3.90 – 3.74 (m, 4H), 3.58 – 3.49 (m, 4H), 3.33 (s, 6H), 3.12 (s, 3H), 2.76 (s, 3H).  $^{13}\text{C}$  NMR (101 MHz,  $\text{CDCl}_3$ )  $\delta$  161.04, 151.27, 145.69, 141.28, 140.07, 136.26, 131.69, 130.16 (d,  $J = 32.7$  Hz), 129.57, 125.51 (dd,  $J = 7.3, 3.5$  Hz), 124.02 (d,  $J = 272.1$  Hz), 115.37, 115.05, 74.28, 71.81, 71.73, 71.36, 69.94, 68.34, 59.06, 59.03, 38.71, 38.33.  $^{19}\text{F}$  NMR (376 MHz,  $\text{CDCl}_3$ )  $\delta$  -62.49. ESI-MS: calculated  $\text{C}_{25}\text{H}_{30}\text{F}_3\text{N}_3\text{O}_8\text{SNa}$   $[\text{M}+\text{Na}]^+$  612.1603; Found 612.1606.

***N*-(6-(3-fluorophenyl)-1,3-bis((2-methoxyethoxy)methyl)-2,4-dioxo-1,2,3,4-tetrahydroquinazolin-7-yl)-*N*-methylmethanesulfonamide (3k)**

Following the above procedure A, the product **3k** was obtained in 60% yield (64.7 mg, 0.120 mmol, 8.0 h) as a yellow oil after column chromatography (eluent = Petroleum ether/EtOAc 1:3 v/v).  $R_f$

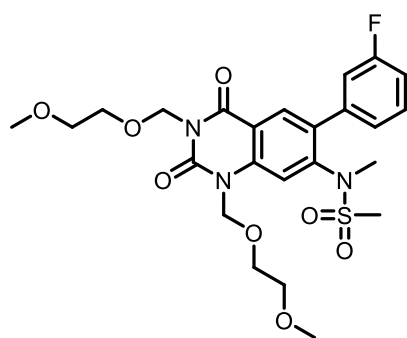

(Petroleum ether/EtOAc 1:3): 0.20.  $^1\text{H}$  NMR (400 MHz,  $\text{CDCl}_3$ )  $\delta$  8.20 (s, 1H), 7.51 (s, 1H), 7.45 – 7.37 (m, 1H), 7.24 – 7.19 (m, 1H), 7.17 – 7.05 (m, 2H), 5.67 (s, 2H), 5.61 (s, 2H), 3.96 – 3.74 (m, 4H), 3.58 – 3.49 (m, 4H), 3.32 (s, 3H), 3.32 (s, 3H), 3.13 (s, 3H), 2.70 (s, 3H).  $^{13}\text{C}$  NMR (101 MHz,  $\text{CDCl}_3$ )  $\delta$  162.58 (d,  $J = 247.1$  Hz), 161.11, 151.31, 145.73,

139.88, 139.74 (d,  $J = 7.9$  Hz), 136.33 (d,  $J = 2.2$  Hz), 131.61, 130.18 (d,  $J = 8.4$  Hz), 125.00 (d,  $J = 3.0$  Hz), 116.22 (d,  $J = 22.1$  Hz), 115.32, 115.26, 115.07 (d,  $J = 20.9$  Hz), 74.26, 71.77, 71.73, 71.38, 69.90, 68.35, 59.06, 59.05, 38.73, 38.61.  $^{19}\text{F}$  NMR (376 MHz,  $\text{CDCl}_3$ )  $\delta$  -112.39. ESI-MS: calculated  $\text{C}_{24}\text{H}_{30}\text{FN}_3\text{O}_8\text{SNa}$   $[\text{M}+\text{Na}]^+$  562.1635; Found 562.1636.

***N*-(1,3-bis((2-methoxyethoxy)methyl)-6-(4-methoxyphenyl)-2,4-dioxo-1,2,3,4-tetrahydroquinazolin-7-yl)-*N*-methylmethanesulfonamide (3l)**

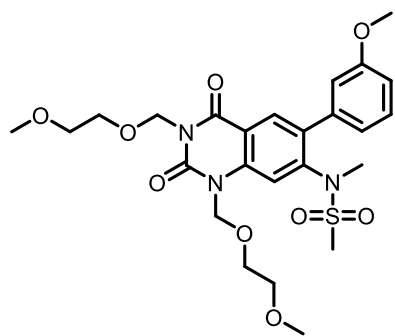

Following the above procedure A, the product **3l** was obtained in 54% yield (59.0 mg, 0.108 mmol, 8.0 h) as a yellow oil after column chromatography (eluent = Petroleum ether/EtOAc 1:3 v/v).  $R_f$  (Petroleum ether/EtOAc 1:3): 0.20.  $^1\text{H}$  NMR (400 MHz,  $\text{CDCl}_3$ )  $\delta$  8.22 (s, 1H), 7.51 (s, 1H), 7.35 (t,  $J = 7.9$  Hz, 1H), 7.02 – 6.90 (m, 3H), 5.68 (s, 2H), 5.62 (s, 2H), 3.84 (s,

3H), 3.84 – 3.79 (m, 4H), 3.59 – 3.46 (m, 4H), 3.34 (s, 3H), 3.33 (s, 3H), 3.10 (s, 3H), 2.69 (s, 3H).  $^{13}\text{C}$  NMR (101 MHz,  $\text{CDCl}_3$ )  $\delta$  161.23, 159.60, 151.37, 145.82, 139.56, 138.92, 137.29, 131.66, 129.61, 121.41, 115.50, 115.14, 114.62, 113.85, 74.28, 71.75, 71.73, 71.40, 69.86, 68.32, 59.06, 55.41, 53.50, 39.10, 38.65. ESI-MS: calculated  $\text{C}_{25}\text{H}_{33}\text{N}_3\text{O}_9\text{SNa}$   $[\text{M}+\text{Na}]^+$  574.1835; Found 574.1838.

**diethyl benzyl(1,3-bis((2-methoxyethoxy)methyl)-2,4-dioxo-6-phenyl-1,2,3,4-tetrahydroquinazolin-7-yl)phosphoramidate (3m)**

Following the above procedure A, the product **3m** was obtained in 67% yield (87.9 mg, 0.134 mmol, 8.0 h) as a yellow oil after column chromatography (eluent = Petroleum ether/EtOAc 1:3 v/v).  $R_f$

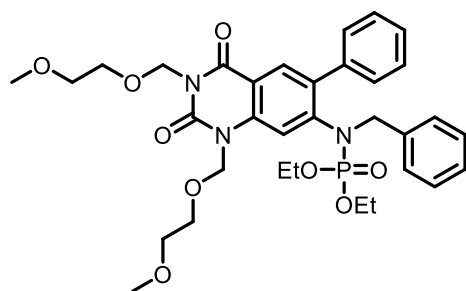

(Petroleum ether/EtOAc 1:3): 0.20. <sup>1</sup>H NMR (400 MHz, CDCl<sub>3</sub>) δ 8.06 (s, 1H), 7.48 – 7.41 (m, 3H), 7.38 (d, *J* = 8.6 Hz, 2H), 7.28 (s, 1H), 7.19 – 7.08 (m, 3H), 6.95 (d, *J* = 4.2 Hz, 2H), 5.57 (s, 2H), 5.47 (s, 2H), 4.16 – 4.03 (m, 4H), 4.00 (t, *J* = 7.3 Hz, 2H), 3.83 – 3.75 (m, 2H),

3.72 – 3.67 (m, 2H), 3.52 – 3.48 (m, 2H), 3.46 – 3.42 (m, 2H), 3.30 (s, 3H), 3.27 (s, 3H), 1.29 (td, *J* = 7.1, 0.9 Hz, 6H). <sup>13</sup>C NMR (101 MHz, CDCl<sub>3</sub>) δ 161.51, 151.57, 146.15, 138.88, 138.14, 136.67, 136.24, 131.63, 129.15, 129.11, 128.43, 128.17, 127.80, 127.62, 116.92, 113.63, 74.23, 71.75, 71.59, 71.43, 69.80, 68.20, 63.26, 63.20, 59.01, 58.99, 53.21, 16.26, 16.19. <sup>31</sup>P NMR (162 MHz, CDCl<sub>3</sub>) δ 4.47. ESI-MS: calculated C<sub>33</sub>H<sub>43</sub>N<sub>3</sub>O<sub>9</sub>P [M+H]<sup>+</sup> 656.2737; Found 656.2740.

***N*-benzyl-*N*-(1,3-bis((2-methoxyethoxy)methyl)-2,4-dioxo-6-phenyl-1,2,3,4-tetrahydroquinazolin-7-yl)-4-methylbenzenesulfonamide (3n)**

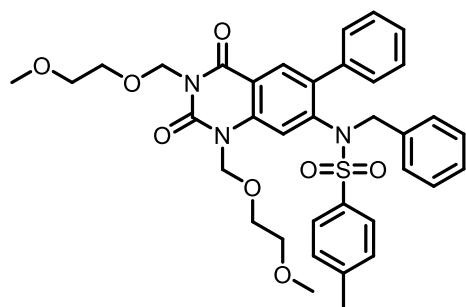

Following the above procedure A, the product **3n** was obtained in 30% yield (39.4 mg, 0.060 mmol, 8.0 h) as a yellow oil after column chromatography (eluent = Petroleum ether/EtOAc 1:1 v/v). *R*<sub>f</sub> (Petroleum ether/EtOAc 1:1): 0.20. <sup>1</sup>H NMR (400 MHz, CDCl<sub>3</sub>) δ 8.08 (s, 1H), 7.65 (d, *J* = 8.3 Hz, 2H), 7.38 – 7.30 (m,

5H), 7.19 (s, 1H), 7.17 – 7.11 (m, 3H), 7.05 (t, *J* = 7.4 Hz, 2H), 6.70 (d, *J* = 6.8 Hz, 2H), 5.59 (s, 2H), 5.43 (s, 2H), 4.32 (s, 2H), 3.87 – 3.78 (m, 2H), 3.77 – 3.72 (m, 2H), 3.57 – 3.47 (m, 4H), 3.33 (s, 3H), 3.30 (s, 3H), 2.48 (s, 3H). <sup>13</sup>C NMR (101 MHz, CDCl<sub>3</sub>) δ 161.28, 151.39, 144.19, 143.38, 138.65, 138.47, 137.37, 136.81, 134.40, 131.71, 129.91, 129.31, 129.24, 128.33, 128.25, 128.18, 128.00, 127.81, 116.48, 114.97, 73.92, 71.78, 71.69, 71.51, 69.90, 68.32, 59.05, 54.54, 21.69. ESI-MS: calculated C<sub>36</sub>H<sub>39</sub>N<sub>3</sub>O<sub>8</sub>SNa [M+Na]<sup>+</sup> 696.2356; Found 696.2360.

***N*-(1,3-bis(ethoxymethyl)-2,4-dioxo-6-(*p*-tolyl)-1,2,3,4-tetrahydroquinazolin-7-yl)-*N*-methylmethanesulfonamide (3o)**

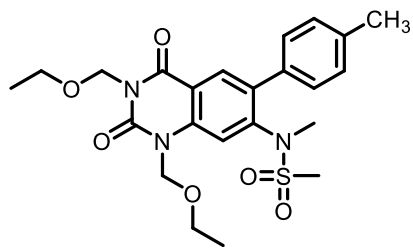

Following the above procedure A, the product **3o** was obtained in 26% yield (25.0 mg, 0.052 mmol, 8.0 h) as a yellow oil after column chromatography (eluent = Petroleum ether/EtOAc 2:1 v/v).  $R_f$ (Petroleum ether/EtOAc 2:1): 0.20.

$^1\text{H}$  NMR (400 MHz,  $\text{CDCl}_3$ )  $\delta$  8.22 (s, 1H), 7.51 (s, 1H), 7.32 (d,  $J = 8.2$  Hz, 2H), 7.29 – 7.24 (m, 2H), 5.64 (s, 2H), 5.58 (s, 2H), 3.71 (qd,  $J = 7.0, 1.2$  Hz, 4H), 3.14 (s, 3H), 2.64 (s, 3H), 2.41 (s, 3H), 1.23 (td,  $J = 7.0, 2.9$  Hz, 6H).  $^{13}\text{C}$  NMR (101 MHz,  $\text{CDCl}_3$ )  $\delta$  161.27, 151.32, 145.83, 139.43, 137.98, 137.39, 134.76, 131.71, 129.31, 128.96, 115.43, 115.17, 73.95, 71.18, 65.98, 64.78, 38.98, 38.70, 21.28, 15.23, 15.02. ESI-MS: calculated  $\text{C}_{23}\text{H}_{29}\text{N}_3\text{O}_6\text{SNa}$   $[\text{M}+\text{Na}]^+$  498.1675; Found 498.1677.

***N*-(6-(4-bromophenyl)-1,3-bis(ethoxymethyl)-2,4-dioxo-1,2,3,4-tetrahydroquinazolin-7-yl)-*N*-methylmethanesulfonamide (3p)**

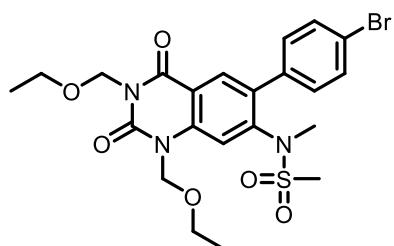

Following the above procedure A, the product **3p** was obtained in 31% yield (33.1 mg, 0.062 mmol, 8.0 h) as a yellow oil after column chromatography (eluent = Petroleum ether/EtOAc 2:1 v/v).  $R_f$  (Petroleum ether/EtOAc 2:1): 0.30.  $^1\text{H}$  NMR (400 MHz,  $\text{CDCl}_3$ )  $\delta$  8.20 (s, 1H), 7.59 (d,  $J = 8.4$  Hz, 2H), 7.49 (s,

1H), 7.32 (d,  $J = 8.4$  Hz, 2H), 5.63 (s, 2H), 5.57 (s, 2H), 3.69 (q,  $J = 7.0$  Hz, 4H), 3.11 (s, 3H), 2.76 (s, 3H), 1.22 (t,  $J = 7.0$  Hz, 6H).  $^{13}\text{C}$  NMR (101 MHz,  $\text{CDCl}_3$ )  $\delta$  161.11, 151.22, 145.60, 139.83, 136.52, 136.24, 131.80, 131.60, 130.76, 122.50, 115.30, 115.16, 73.98, 71.22, 66.04, 64.83, 38.75, 38.68, 15.23, 15.02. ESI-MS: calculated  $\text{C}_{22}\text{H}_{26}\text{BrN}_3\text{O}_6\text{SNa}$   $[\text{M}+\text{Na}]^+$  562.0623; Found 562.0624.

***N*-(6-(4-cyanophenyl)-1,3-bis(ethoxymethyl)-2,4-dioxo-1,2,3,4-tetrahydroquinazolin-7-yl)-*N*-methylmethanesulfonamide (3q)**

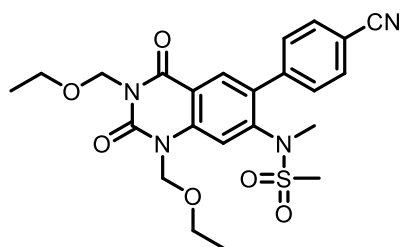

Following the above procedure A, the product **3q** was obtained in 40% yield (40.0 mg, 0.080 mmol, 8.0 h) as a yellow oil after column chromatography (eluent = Petroleum ether/EtOAc 1:1 v/v).  $R_f$ (Petroleum ether/EtOAc 1:1): 0.30.

$^1\text{H}$  NMR (400 MHz,  $\text{CDCl}_3$ )  $\delta$  8.22 (s, 1H), 7.76 (d,  $J = 8.4$

Hz, 2H), 7.57 (d,  $J = 8.5$  Hz, 2H), 7.50 (s, 1H), 5.64 (s, 2H), 5.56 (s, 2H), 3.69 (q,  $J = 7.1$  Hz, 4H), 3.13 (s, 3H), 2.82 (s, 3H), 1.21 (td,  $J = 7.0, 0.8$  Hz, 6H).  $^{13}\text{C}$  NMR (101 MHz,  $\text{CDCl}_3$ )  $\delta$  160.94, 151.14, 145.49, 142.35, 140.34, 135.72, 132.34, 131.67, 129.95, 118.55, 115.46, 114.86, 111.94, 74.01, 71.27, 66.10, 64.90, 38.76, 38.12, 15.22, 15.02. ESI-MS: calculated  $\text{C}_{23}\text{H}_{26}\text{N}_4\text{O}_6\text{SNa}$   $[\text{M}+\text{Na}]^+$  509.1471; Found 509.1465.

***N*-(1,3-bis(ethoxymethyl)-2,4-dioxo-6-phenyl-1,2,3,4-tetrahydroquinazolin-7-yl)-*N*,4-dimethylbenzenesulfonamide (3r)**

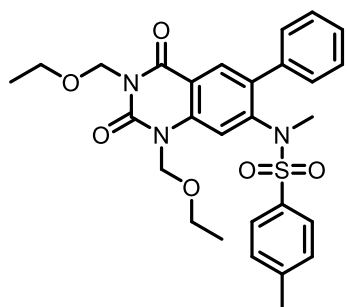

Following the above procedure A, the product **3r** was obtained in 21% yield (23.0 mg, 0.042 mmol, 8.0 h) as a yellow oil after column chromatography (eluent = Petroleum ether/EtOAc 2:1 v/v).  $R_f$ (Petroleum ether/EtOAc 2:1): 0.30.  $^1\text{H}$  NMR (400 MHz,  $\text{CDCl}_3$ )  $\delta$  8.22 (s, 1H), 7.58 (d,  $J = 8.3$  Hz, 2H), 7.41 (d,  $J = 1.9$  Hz, 5H), 7.29 (d,  $J = 8.0$  Hz, 2H), 7.23 (s, 1H), 5.56 (s, 2H), 5.45 (s, 2H),

3.69 (q,  $J = 7.0$  Hz, 2H), 3.64 (q,  $J = 7.0$  Hz, 2H), 2.92 (s, 3H), 2.45 (s, 3H), 1.21 (td,  $J = 7.1, 6.3, 1.7$  Hz, 6H).  $^{13}\text{C}$  NMR (101 MHz,  $\text{CDCl}_3$ )  $\delta$  161.29, 151.33, 145.99, 144.00, 139.22, 137.45, 137.41, 135.74, 131.79, 129.82, 129.08, 128.51, 127.92, 127.90, 114.98, 114.60, 73.72, 71.16, 65.99, 64.71, 38.72, 21.65, 15.24, 15.03. ESI-MS: calculated  $\text{C}_{28}\text{H}_{31}\text{N}_3\text{O}_6\text{SNa}$   $[\text{M}+\text{Na}]^+$  560.1831; Found 560.1835.

***N*-(1,3-bis(ethoxymethyl)-2,4-dioxo-6-phenyl-1,2,3,4-tetrahydroquinazolin-7-yl)-*N*-phenylmethanesulfonamide (3s)**

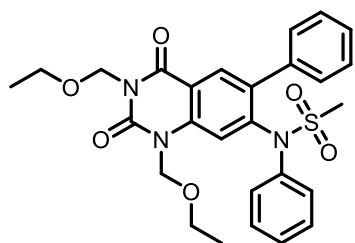

Following the above procedure A, the product **3s** was obtained in 55% yield (57.9 mg, 0.110 mmol, 8.0 h) as a yellow oil after column chromatography (eluent = Petroleum ether/EtOAc 2:1 v/v).  $R_f$ (Petroleum ether/EtOAc 2:1): 0.20.  $^1\text{H}$  NMR (400 MHz,  $\text{CDCl}_3$ )  $\delta$  8.17 (s, 1H), 7.75 (s, 1H), 7.35 (dd,  $J = 5.0, 2.0$  Hz, 3H),

7.26 (d,  $J = 1.6$  Hz, 1H), 7.24 (d,  $J = 3.9$  Hz, 1H), 7.16 (q,  $J = 5.0$  Hz, 3H), 6.94 (dd,  $J = 7.8, 2.0$  Hz, 2H), 5.69 (s, 2H), 5.57 (s, 2H), 3.90 – 3.59 (m, 4H), 2.93 (s, 3H), 1.23 (q,  $J = 7.2$  Hz, 6H).  $^{13}\text{C}$  NMR (101 MHz,  $\text{CDCl}_3$ )  $\delta$  161.32, 151.41, 145.08, 140.02, 139.51, 137.91, 137.43, 132.05, 129.47,

129.23, 128.37, 128.12, 127.11, 126.43, 116.67, 115.19, 74.17, 71.26, 66.09, 64.72, 40.25, 15.33, 15.14. ESI-MS: calculated  $C_{27}H_{29}N_3O_6SNa$   $[M+Na]^+$  546.1675; Found 546.1676.

**1,3-bis(ethoxymethyl)-7-(2-oxopyrrolidin-1-yl)-6-phenylquinazoline-2,4(1H,3H)-dione (3t)**

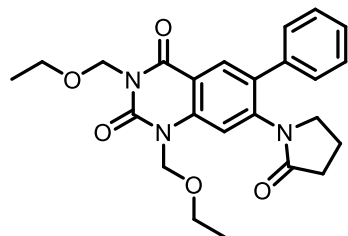

Following the above procedure A, the product **3t** was obtained in 83% yield (72.7 mg, 0.166 mmol, 8.0 h) as a yellow oil after column chromatography (eluent = Petroleum ether/EtOAc 1:3 v/v).  $R_f$ (Petroleum ether/EtOAc 1:3): 0.20.  $^1H$  NMR (400 MHz,  $CDCl_3$ )

$\delta$  8.21 (s, 1H), 7.43 (s, 1H), 7.39 (dd,  $J = 8.2, 3.0$  Hz, 2H), 7.36 – 7.30 (m, 3H), 5.61 (s, 2H), 5.55 (s, 2H), 3.67 (dq,  $J = 9.7, 7.0$  Hz, 4H), 3.21 (t,  $J = 7.0$  Hz, 2H), 2.43 (t,  $J = 8.0$  Hz, 2H), 1.89 (q,  $J = 7.4$  Hz, 2H), 1.20 (dt,  $J = 10.1, 7.1$  Hz, 6H).  $^{13}C$  NMR (101 MHz,  $CDCl_3$ )  $\delta$  175.64, 161.39, 151.40, 143.02, 139.54, 137.39, 135.07, 131.42, 128.79, 128.20, 128.17, 115.16, 114.71, 73.87, 71.14, 65.89, 64.93, 49.72, 31.15, 19.03, 15.24, 15.01. ESI-MS: calculated  $C_{24}H_{27}N_3O_5Na$  460.1848; Found 460.1850.

**1,3-bis(ethoxymethyl)-6,7-diphenylquinazoline-2,4(1H,3H)-dione (3u)**

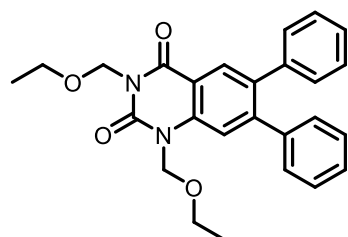

Following the above procedure A, the product **3u** was obtained in 13% yield (11.4 mg, 0.026 mmol, 8.0 h) as a yellow oil after column chromatography (eluent = Petroleum ether/EtOAc 8:1 v/v).  $R_f$ (Petroleum ether/EtOAc 8:1): 0.20.  $^1H$  NMR (400 MHz,  $CDCl_3$ )

$\delta$  8.27 (s, 1H), 7.50 (s, 1H), 7.29 – 7.25 (m, 3H), 7.24 – 7.21 (m, 3H), 7.18 – 7.15 (m, 2H), 7.12 (t,  $J = 4.0$  Hz, 2H), 5.67 (s, 2H), 5.61 (s, 2H), 3.87 – 3.63 (m, 4H), 1.23 (td,  $J = 7.1, 2.7$  Hz, 9H).  $^{13}C$  NMR (101 MHz,  $CDCl_3$ )  $\delta$  161.86, 151.61, 148.06, 140.03, 139.48, 138.78, 136.75, 130.74, 129.77, 129.65, 128.20, 128.10, 127.70, 127.02, 116.96, 114.60, 73.72, 71.14, 65.92, 64.78, 15.24, 15.05. ESI-MS: calculated  $C_{26}H_{27}N_2O_4$   $[M+H]^+$  431.1971; Found 431.1970.

**2-((1R,5S)-6,6-dimethylbicyclo[3.1.1]hept-2-en-2-yl)ethyl 4-(1,3-bis(ethoxymethyl)-7-(N-methylmethylsulfonamido)-2,4-dioxo-1,2,3,4-tetrahydroquinazolin-6-yl)benzoate (4a)**

Following the above procedure A, the product **4a** was obtained in 62% yield (81.1 mg, 0.124 mmol, 8.0 h) as a yellow oil after column chromatography (eluent = Petroleum ether/EtOAc 1:1 v/v).  $R_f$

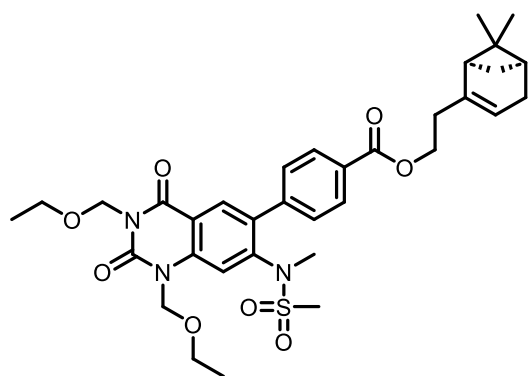

(Petroleum ether/EtOAc 1:1): 0.30.  $^1\text{H NMR}$  (400 MHz,  $\text{CDCl}_3$ )  $\delta$  8.23 (s, 1H), 8.12 (d,  $J = 8.3$  Hz, 2H), 7.52 (s, 1H), 7.51 (d,  $J = 6.5$  Hz, 2H), 5.64 (s, 2H), 5.57 (s, 2H), 5.38 (s, 1H), 4.36 (td,  $J = 6.9, 2.5$  Hz, 2H), 3.70 (qd,  $J = 7.0, 1.4$  Hz, 4H), 3.13 (s, 3H), 2.67 (s, 3H), 2.48 – 2.43 (m, 2H), 2.39 (dt,  $J = 8.5, 5.6$  Hz, 1H), 2.32 – 2.19 (m, 2H), 2.12 (dt,  $J = 10.6, 4.9$  Hz, 2H), 1.28 (s, 3H), 1.22 (td,  $J = 7.0, 2.5$  Hz, 6H), 1.18 (d,  $J = 8.6$  Hz, 1H), 0.84 (s, 3H).  $^{13}\text{C NMR}$  (101 MHz,  $\text{CDCl}_3$ )  $\delta$  166.16, 161.12, 151.23, 145.65, 144.13, 142.24, 142.20, 140.04, 136.44, 131.61, 130.00, 129.80, 129.20, 119.06, 115.27, 73.98, 71.23, 66.05, 64.85, 63.57, 45.69, 40.68, 38.74, 38.05, 36.03, 31.72, 31.40, 29.44, 26.28, 21.20, 15.23, 15.03. ESI-MS: calculated  $\text{C}_{34}\text{H}_{44}\text{N}_3\text{O}_8\text{S}$   $[\text{M}+\text{H}]^+$  654.2849; Found 654.2852.

**(1*R*,2*S*,5*R*)-2-isopropyl-5-methylcyclohexyl 4-(1,3-bis((2-methoxyethoxy)methyl)-7-(*N*-methylmethylsulfonamido)-2,4-dioxo-1,2,3,4-tetrahydroquinazolin-6-yl)benzoate (4b)**

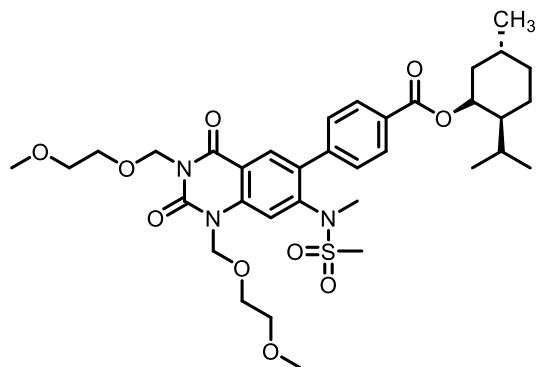

Following the above procedure A, the product **4b** was obtained in 56% yield (78.8 mg, 0.112 mmol, 8.0 h) as a yellow oil after column chromatography (eluent = Petroleum ether/EtOAc 1:3 v/v).  $R_f$ (Petroleum ether/EtOAc 1:3): 0.20.  $^1\text{H NMR}$  (400 MHz,  $\text{CDCl}_3$ )  $\delta$  8.22 (s, 1H), 8.12 (d,  $J = 8.4$  Hz, 2H), 7.53 (d,  $J = 3.6$  Hz, 2H), 7.50 (s, 1H), 5.68 (s, 2H), 5.62 (s, 2H), 4.95 (td,  $J = 10.9, 4.4$  Hz, 1H), 3.99 – 3.75 (m, 4H), 3.53 (dt,  $J = 6.6, 2.6$  Hz, 4H), 3.33 (s, 3H), 3.33 (s, 3H), 3.13 (s, 3H), 2.73 (s, 3H), 2.20 – 2.11 (m, 1H), 2.06 – 1.92 (m, 1H), 1.74 (d,  $J = 13.0$  Hz, 2H), 1.57 (td,  $J = 10.8, 9.9, 2.9$  Hz, 2H), 1.18 – 1.04 (m, 2H), 0.94 (d,  $J = 1.3$  Hz, 3H), 0.93 (d,  $J = 1.7$  Hz, 3H), 0.91 – 0.85 (m, 1H), 0.81 (d,  $J = 6.9$  Hz, 3H).  $^{13}\text{C NMR}$  (101 MHz,  $\text{CDCl}_3$ )  $\delta$  165.71, 161.07, 151.29, 145.72, 142.08, 139.96, 136.66, 131.63, 130.46, 129.77, 129.14, 115.33, 115.22, 75.16, 74.29, 71.81, 71.76, 71.41, 69.93, 68.35, 59.03, 59.01, 47.27, 40.99, 38.74, 34.31, 31.48, 29.70, 26.48, 23.61, 22.06, 20.82, 16.51. ESI-MS: calculated  $\text{C}_{35}\text{H}_{50}\text{N}_3\text{O}_{10}\text{S}$   $[\text{M}+\text{H}]^+$  704.3217; Found 704.3217.

**(3a*R*,5*S*,6*R*,6a*R*)-5-((*R*)-2,2-dimethyl-1,3-dioxolan-4-yl)-2,2-dimethyltetrahydrofuro[2,3-*d*][1,3]dioxol-6-yl 4-(1,3-bis(ethoxymethyl)-7-(*N*-methylmethylsulfonamido)-2,4-dioxo-1,2,3,4-tetrahydroquinazolin-6-yl)benzoate (4c)**

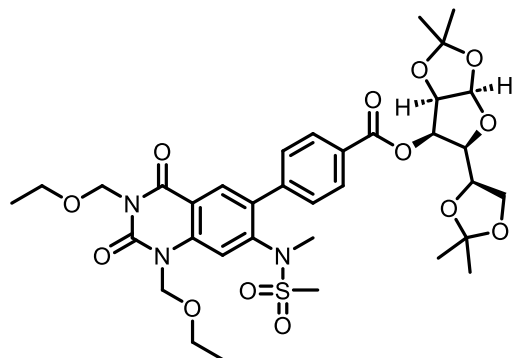

Following the above procedure A, the product **4c** was obtained in 36% yield (53.8 mg, 0.072 mmol, 8.0 h) as a yellow oil after column chromatography (eluent = Petroleum ether/EtOAc 1:3 v/v).  $R_f$  (Petroleum ether/EtOAc 1:3): 0.30.  $^1\text{H NMR}$  (400 MHz,  $\text{CDCl}_3$ )  $\delta$  8.24 (s, 1H), 8.16 – 8.01 (m, 2H),

7.61 – 7.54 (m, 2H), 7.52 (s, 1H), 5.88 (d,  $J = 4.1$  Hz, 1H), 5.64 (s, 2H), 5.57 (s, 2H), 5.34 (t,  $J = 6.0$  Hz, 1H), 4.95 (dd,  $J = 5.7, 4.1$  Hz, 1H), 4.78 (dt,  $J = 9.0, 6.8$  Hz, 1H), 4.30 – 4.09 (m, 2H), 3.73 – 3.68 (m, 4H), 3.67 – 3.62 (m, 1H), 3.14 (s, 3H), 2.76 (s, 3H), 1.54 (s, 3H), 1.46 (s, 3H), 1.42 (s, 3H), 1.34 (s, 3H), 1.22 (td,  $J = 7.1, 1.4$  Hz, 6H).  $^{13}\text{C NMR}$  (101 MHz,  $\text{CDCl}_3$ )  $\delta$  165.13, 161.03, 151.19, 145.55, 143.09, 140.15, 136.22, 131.74, 129.99, 129.51, 128.48, 115.38, 115.02, 114.92, 109.62, 105.11, 81.17, 79.06, 75.13, 74.00, 72.52, 71.24, 66.44, 66.07, 64.88, 38.80, 38.35, 27.00, 26.93, 26.73, 25.36, 15.23, 15.03. ESI-MS: calculated  $\text{C}_{35}\text{H}_{46}\text{N}_3\text{O}_{13}\text{S}$   $[\text{M}+\text{H}]^+$  748.2751; Found 748.2747.

**(8*R*,9*S*,13*S*,14*S*)-13-methyl-17-oxo-7,8,9,11,12,13,14,15,16,17-decahydro-6*H*-cyclopenta[*a*]phenanthren-3-yl 4-(1,3-bis(ethoxymethyl)-7-(*N*-methylmethylsulfonamido)-2,4-dioxo-1,2,3,4-tetrahydroquinazolin-6-yl)benzoate (4d)**

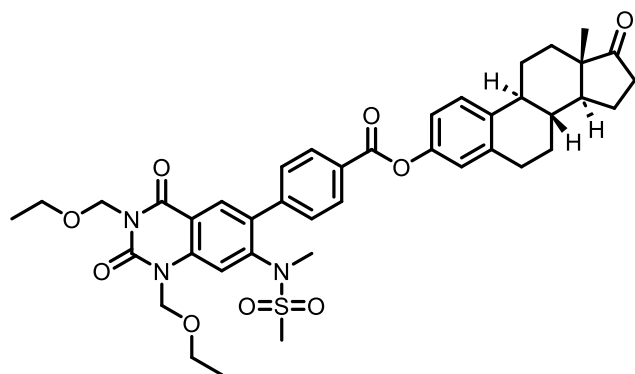

Following the above procedure A, the product **4d** was obtained in 31% yield (47.0 mg, 0.062 mmol, 8.0 h) as a yellow oil after column chromatography (eluent = Petroleum ether/EtOAc 1:1 v/v).  $R_f$  (Petroleum ether/EtOAc 1:1): 0.30.  $^1\text{H NMR}$  (400 MHz,  $\text{CDCl}_3$ )  $\delta$

8.28 (d,  $J = 8.3$  Hz, 2H), 8.27 (s, 1H), 7.59 (d,  $J = 8.4$  Hz, 2H), 7.53 (s, 1H), 7.35 (d,  $J = 8.4$  Hz,

1H), 7.07 – 6.92 (m, 2H), 5.65 (s, 2H), 5.58 (s, 2H), 3.71 (q,  $J = 7.0$  Hz, 4H), 3.15 (s, 3H), 2.96 (dd,  $J = 9.0, 4.2$  Hz, 2H), 2.77 (s, 3H), 2.52 (dd,  $J = 18.7, 8.6$  Hz, 1H), 2.47 – 2.39 (m, 1H), 2.33 (t,  $J = 8.8$  Hz, 1H), 2.20 – 2.07 (m, 2H), 2.00 (dd,  $J = 16.8, 6.0$  Hz, 2H), 1.71 – 1.63 (m, 2H), 1.55 (d,  $J = 13.1$  Hz, 2H), 1.49 (d,  $J = 13.6$  Hz, 2H), 1.23 (td,  $J = 7.0, 1.7$  Hz, 6H), 0.93 (s, 3H).  $^{13}\text{C}$  NMR (101 MHz,  $\text{CDCl}_3$ )  $\delta$  165.10, 161.10, 151.21, 148.74, 145.63, 142.94, 140.12, 138.20, 137.60, 136.36, 131.68, 130.40, 129.39, 129.18, 126.59, 121.71, 118.85, 115.34, 115.15, 74.00, 71.25, 66.07, 64.87, 50.42, 48.00, 44.20, 38.78, 38.56, 38.00, 35.91, 31.55, 29.48, 26.37, 25.79, 21.63, 15.24, 15.04, 13.87. ESI-MS: calculated  $\text{C}_{35}\text{H}_{45}\text{N}_3\text{O}_{13}\text{SNa}$   $[\text{M}+\text{Na}]^+$  780.2930; Found 780.2921.

**(1*r*,3*r*)-adamantan-2-yl 4-(1,3-bis(ethoxymethyl)-7-(*N*-methylmethylsulfonamido)-2,4-dioxo-1,2,3,4-tetrahydroquinazolin-6-yl)benzoate (4e)**

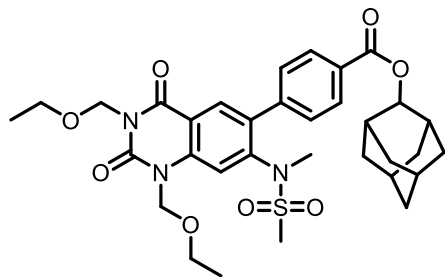

Following the above procedure A, the product **4e** was obtained in 25% yield (32.0 mg, 0.050 mmol, 8.0 h) as a yellow oil after column chromatography (eluent = Petroleum ether/EtOAc 2:1 v/v).  $R_f$  (Petroleum ether/EtOAc 2:1): 0.20.  $^1\text{H}$  NMR (400 MHz,  $\text{CDCl}_3$ )  $\delta$

8.24 (s, 1H), 8.18 (d,  $J = 8.3$  Hz, 2H), 7.54 (s, 1H), 7.52 (d,  $J = 3.4$  Hz, 2H), 5.64 (s, 2H), 5.57 (s, 2H), 5.22 (d,  $J = 3.3$  Hz, 1H), 3.70 (q,  $J = 7.0$  Hz, 4H), 3.13 (s, 3H), 2.72 (s, 3H), 2.20 (s, 1H), 2.18 – 2.14 (m, 2H), 1.96 – 1.91 (m, 2H), 1.86 (d,  $J = 12.8$  Hz, 1H), 1.79 (d,  $J = 2.9$  Hz, 2H), 1.67 (d,  $J = 3.3$  Hz, 1H), 1.63 (d,  $J = 13.1$  Hz, 4H), 1.22 (td,  $J = 7.1, 2.3$  Hz, 6H).  $^{13}\text{C}$  NMR (101 MHz,  $\text{CDCl}_3$ )  $\delta$  165.44, 161.12, 151.23, 145.64, 142.10, 140.01, 136.52, 131.68, 130.70, 129.82, 129.18, 115.30, 115.22, 77.84, 73.98, 71.24, 66.05, 64.85, 38.76, 37.37, 36.36, 32.03, 27.30, 27.00, 15.24, 15.03. ESI-MS: calculated  $\text{C}_{33}\text{H}_{42}\text{N}_3\text{O}_8\text{S}$   $[\text{M}+\text{H}]^+$  640.2693; Found 640.2693.

**((3*aS*,5*aR*,8*bS*)-2,2,7,7-tetramethyltetrahydro-3*aH*-bis([1,3]dioxolo)[4,5-*b*:4',5'-*d*]pyran-3*a*-yl)methyl 4-(1,3-bis(ethoxymethyl)-7-(*N*-methylmethylsulfonamido)-2,4-dioxo-1,2,3,4-tetrahydroquinazolin-6-yl)benzoate (4f)**

Following the above procedure A, the product **4f** was obtained in 30% yield (44.9 mg, 0.060 mmol, 8.0 h) as a yellow oil after column chromatography (eluent = Petroleum ether/EtOAc 1:1 v/v).  $R_f$

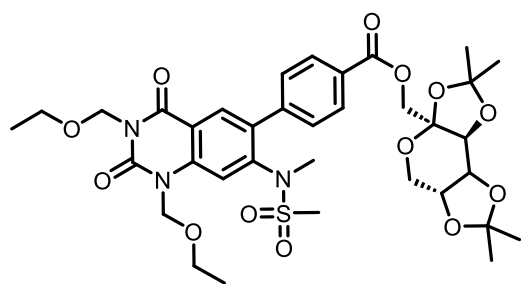

(Petroleum ether/EtOAc 1:1): 0.20. <sup>1</sup>H NMR (400 MHz, CDCl<sub>3</sub>) δ 8.23 (s, 1H), 8.17 (d, *J* = 8.3 Hz, 2H), 7.53 (s, 1H), 7.51 (d, *J* = 3.6 Hz, 2H), 5.64 (s, 2H), 5.57 (s, 2H), 4.70 (d, *J* = 11.8 Hz, 1H), 4.65 (dd, *J* = 7.9, 2.6 Hz, 1H), 4.47 (d, *J* = 2.6 Hz, 1H),

4.35 (d, *J* = 11.8 Hz, 1H), 4.27 (d, *J* = 9.6 Hz, 1H), 3.97 (dd, *J* = 13.1, 1.9 Hz, 1H), 3.81 (d, *J* = 13.0 Hz, 1H), 3.70 (q, *J* = 7.0 Hz, 4H), 3.11 (s, 3H), 2.68 (s, 3H), 1.56 (s, 3H), 1.48 (s, 3H), 1.39 (s, 3H), 1.35 (s, 3H), 1.22 (td, *J* = 7.0, 2.1 Hz, 6H). <sup>13</sup>C NMR (101 MHz, CDCl<sub>3</sub>) δ 165.56, 161.11, 151.21, 145.64, 142.55, 140.09, 136.30, 131.60, 130.01, 129.46, 129.28, 115.27, 115.24, 109.20, 108.92, 101.62, 73.99, 71.23, 70.77, 70.58, 70.06, 66.06, 65.61, 64.86, 61.37, 38.70, 26.55, 25.92, 25.55, 24.02, 15.23, 15.02. ESI-MS: calculated C<sub>35</sub>H<sub>45</sub>N<sub>3</sub>O<sub>13</sub>SNa [M+Na]<sup>+</sup> 770.2571; Found 770.2570.

***tert*-butyl (4-(1,3-bis(ethoxymethyl)-7-(*N*-methylmethylsulfonamido)-2,4-dioxo-1,2,3,4-tetrahydroquinazolin-6-yl)benzoyl)prolinate (4g)**

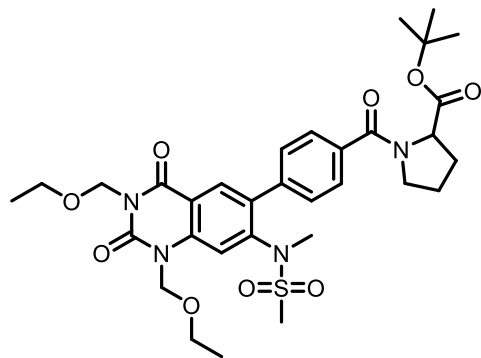

Following the above procedure A, the product **4g** was obtained in 92% yield (115.7 mg, 0.184 mmol, 8.0 h) as a yellow oil after column chromatography (eluent = Petroleum ether/EtOAc 1:3 v/v). R<sub>f</sub> (Petroleum ether/EtOAc 1:3): 0.30. <sup>1</sup>H NMR (400 MHz, CDCl<sub>3</sub>) δ 8.21 (s, 1H), 7.67 (d, *J* = 8.1 Hz, 1H), 7.58 – 7.53

(m, 2H), 7.47 (dd, *J* = 12.0, 8.0 Hz, 2H), 5.63 (s, 2H), 5.57 (s, 2H), 4.57 (dd, *J* = 8.2, 5.5 Hz, 1H), 3.70 (q, *J* = 7.0 Hz, 4H), 3.09 (s, 3H), 2.72 (s, 3H), 2.38 – 2.17 (m, 2H), 2.11 – 2.01 (m, 2H), 2.00 – 1.84 (m, 2H), 1.51 (s, 9H), 1.22 (td, *J* = 7.0, 2.4 Hz, 6H). <sup>13</sup>C NMR (101 MHz, CDCl<sub>3</sub>) δ 171.38, 168.91, 161.15, 151.24, 145.71, 139.87, 139.49, 136.49, 136.07, 131.67, 129.03, 127.84, 127.61, 127.13, 115.34, 115.23, 81.47, 73.97, 71.21, 66.02, 64.82, 60.07, 50.10, 38.91, 38.72, 29.45, 28.05, 25.48, 15.23, 15.02. ESI-MS: calculated C<sub>32</sub>H<sub>42</sub>N<sub>4</sub>O<sub>9</sub>SNa [M+Na]<sup>+</sup> 681.2570; Found 681.2572.

***N*-(1,3-bis(ethoxymethyl)-2,4-dioxo-6-(4-((1*R*,5*S*)-3-oxo-8-azabicyclo[3.2.1]octane-8-carbonyl)phenyl)-1,2,3,4-tetrahydroquinazolin-7-yl)-*N*-methylmethanesulfonamide (4h)**

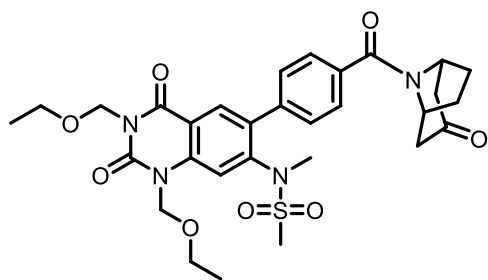

Following the above procedure A, the product **4h** was obtained in 73% yield (89.5 mg, 0.146 mmol, 8.0 h) as a yellow oil after column chromatography (eluent = Petroleum ether/EtOAc 1:3 v/v).  $R_f$  (Petroleum ether/EtOAc 1:3): 0.20.  $^1\text{H NMR}$  (400 MHz,  $\text{DMSO-}d_6$ )  $\delta$  8.02 (s, 1H), 7.67 (d,  $J = 8.2$  Hz, 2H), 7.61 (s, 1H), 7.54 (t,  $J = 4.2$  Hz, 2H), 5.66 (s, 2H), 5.40 (s, 2H), 3.61 (dt,  $J = 13.2, 6.9$  Hz, 4H), 3.38 (s, 1H), 3.26 (s, 1H), 3.16 (s, 3H), 2.92 (s, 3H), 2.85 – 2.66 (m, 2H), 2.41 – 2.19 (m, 2H), 2.08 (d,  $J = 12.8$  Hz, 2H), 1.66 (d,  $J = 8.3$  Hz, 2H), 1.11 (dt,  $J = 13.6, 7.0$  Hz, 6H).  $^{13}\text{C NMR}$  (101 MHz,  $\text{CDCl}_3$ )  $\delta$  207.28, 168.32, 161.06, 151.21, 145.67, 140.07, 139.99, 136.30, 135.07, 131.74, 129.74, 129.45, 127.68, 127.52, 115.33, 115.11, 74.00, 71.23, 66.03, 64.85, 42.71, 41.48, 38.74, 38.67, 32.87, 15.21, 15.00. ESI-MS: calculated  $\text{C}_{30}\text{H}_{37}\text{N}_4\text{O}_8\text{S}$   $[\text{M}+\text{H}]^+$  613.2332; Found 613.2336.

***N*-(1,3-bis(ethoxymethyl)-2,4-dioxo-6-(4-((1*S*,5*R*)-8-oxo-1,3,4,5,6,8-hexahydro-2*H*-1,5-methanopyrido[1,2-*a*][1,5]diazocine-3-carbonyl)phenyl)-1,2,3,4-tetrahydroquinazolin-7-yl)-*N*-methylmethanesulfonamide (**4i**)**

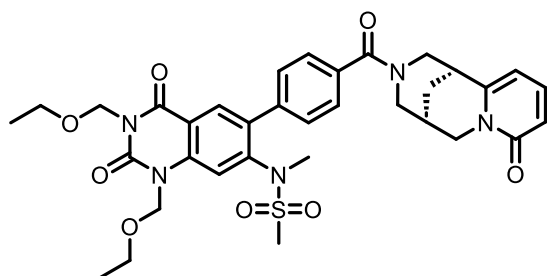

Following the above procedure A, the product **4i** was obtained in 42% yield (56.9 mg, 0.084 mmol, 8.0 h) as a yellow oil after column chromatography (eluent = Petroleum ether/EtOAc 1:3 v/v).  $R_f$  (Petroleum ether/EtOAc 1:3): 0.10.  $^1\text{H NMR}$  (400 MHz,  $\text{DMSO-}d_6$ )  $\delta$  7.96 (s, 1H), 7.57 (s, 1H), 7.51 – 7.28 (m, 4H), 6.80 (dd,  $J = 50.2, 23.3$  Hz, 2H), 6.31 (d,  $J = 9.2$  Hz, 1H), 5.64 (s, 2H), 5.39 (s, 2H), 3.97 (d,  $J = 6.6$  Hz, 1H), 3.72 (d,  $J = 35.5$  Hz, 2H), 3.59 (dd,  $J = 12.1, 7.0$  Hz, 4H), 3.22 (s, 2H), 3.11 (s, 3H), 3.02 (d,  $J = 29.5$  Hz, 2H), 2.92 (s, 3H), 2.10 – 1.86 (m, 2H), 1.10 (p,  $J = 7.0$  Hz, 6H).  $^{13}\text{C NMR}$  (101 MHz,  $\text{DMSO-}d_6$ )  $\delta$  172.24, 162.64, 161.13, 151.23, 149.98, 146.00, 140.05, 139.54, 139.13, 136.45, 135.98, 130.30, 129.16, 126.66, 126.61, 116.55, 115.77, 115.10, 105.44, 73.47, 71.12, 65.14, 64.02, 49.06, 41.94, 41.25, 37.96, 32.91, 29.45, 27.47, 25.66, 15.53, 15.32. ESI-MS: calculated  $\text{C}_{34}\text{H}_{40}\text{N}_5\text{O}_8\text{S}$   $[\text{M}+\text{H}]^+$  678.2598; Found 678.2601.

## 4. Scale-up experiment and synthetic applications

### (a) Scale-up experiment:

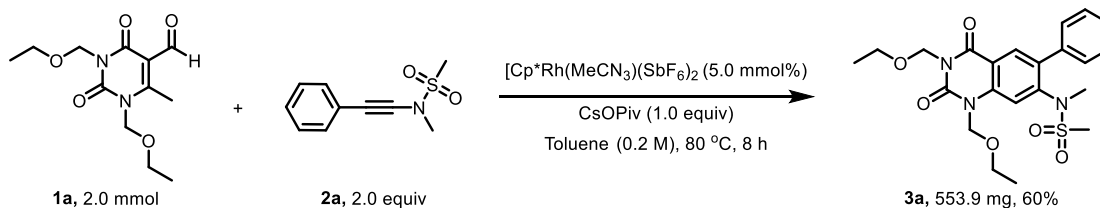

In an oven-dried Schlenk tube, a mixture of the 6-Methyluracil-5-carbaldehyde derivatives **1a** (2.0 mmol, 1.0 equiv), *N*-methyl-*N*-(phenylethynyl)methanesulfonamide **2a** (4.0 mmol, 2.0 equiv), [Cp\*Rh(MeCN)<sub>3</sub>](SbF<sub>6</sub>)<sub>2</sub> (5.0 mol%), CsOPiv (2.0 mmol, 1.0 equiv) and Toluene (10.0 mL, 0.2 M) was stirred at 80 °C in the oil bath for 8 h. The reaction mixture was then diluted with DCM (50.0 mL) and washed with H<sub>2</sub>O. The aqueous phase was extracted with DCM again. The organic layers were combined, washed with brine and dried over Na<sub>2</sub>SO<sub>4</sub>. The product was purified by flash column chromatography on silica with an appropriate solvent to afford the pure product **3a** (553.9 mg, 60 %) as a yellow oil.

### (b) Products transformation:

#### 1. Procedure for the synthesis of product **5**<sup>[3]</sup>

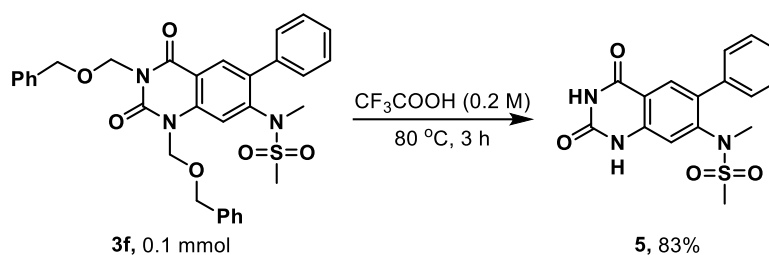

**3f** (58.6 mg, 0.1 mmol, 1.0 equiv) was dissolved in CF<sub>3</sub>CO<sub>2</sub>H (3.0 mL, 0.02 M). After being stirred at 80 °C for 3 h, the reaction mixture was concentrated in vacuo. The reaction mixture was then diluted with DCM (20.0 mL) and washed with H<sub>2</sub>O. The aqueous phase was extracted with DCM again. The organic layers were combined, washed with brine and dried over Na<sub>2</sub>SO<sub>4</sub>. The residue was purified by column chromatography on silica gel (EtOAc : *n*-Hexane = 4:1) to give **5** (28.7 mg, 83%) as a white solid.

*N*-(2,4-dioxo-6-phenyl-1,2,3,4-tetrahydroquinazolin-7-yl)-*N*-methylmethanesulfonamide (**5**)

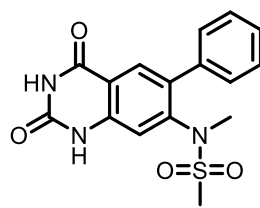

$^1\text{H}$  NMR (400 MHz,  $\text{DMSO-}d_6$ )  $\delta$  11.42 (s, 1H), 11.22 (s, 1H), 7.79 (s, 1H), 7.53 – 7.34 (m, 5H), 7.31 (s, 1H), 2.98 (s, 3H), 2.86 (s, 3H).  $^{13}\text{C}$  NMR (101 MHz,  $\text{DMSO-}d_6$ )  $\delta$  162.60, 150.64, 145.67, 141.22, 138.49, 135.72, 129.46, 129.38, 128.80, 127.98, 115.20, 114.30, 38.57, 38.52. ESI-MS:

calculated  $\text{C}_{16}\text{H}_{16}\text{N}_3\text{O}_4\text{S}$   $[\text{M}+\text{H}]^+$  346.0862; Found 346.0860.

## 2. Procedure for the synthesis of product 6<sup>[4]</sup>

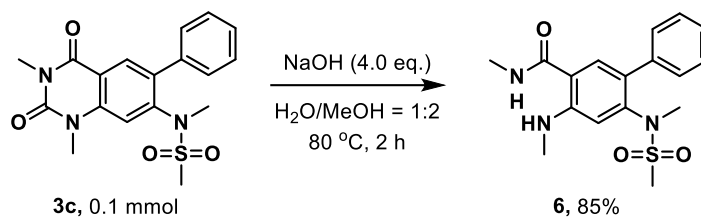

To a solution of **3c** (37.3 mg, 0.1 mmol, 1.0 equiv) in  $\text{MeOH}/\text{H}_2\text{O}$  (2:1, 2.0 mL, 0.05 M) was added  $\text{NaOH}$  (16.0 mg, 0.4 mmol, 4.0 equiv) at 25 °C. After being stirred at 80 °C for 2 h, the reaction mixture was concentrated in vacuo. The product was extracted with  $\text{EtOAc}$  (three times), dried over  $\text{MgSO}_4$ , and concentrated in vacuo. The residue was purified by column chromatography on silica gel ( $\text{Acetone} : n\text{-Hexane} = 2:1$ ) to give **6** (29.5 mg, 85%) as a white solid.

### *N*-methyl-4-(methyamino)-6-(*N*-methylmethylsulfonamido)-[1,1'-biphenyl]-3-carboxamide

(6)

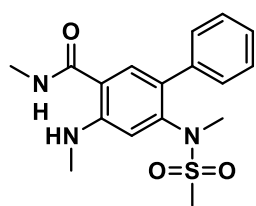

$^1\text{H}$  NMR (400 MHz,  $\text{CDCl}_3$ )  $\delta$  7.56 (s, 1H), 7.42 – 7.30 (m, 5H), 7.29 (s, 1H), 6.62 (s, 1H), 6.11 (s, 1H), 3.12 (s, 3H), 2.91 (d,  $J = 4.8$  Hz, 3H), 2.88 (s, 3H), 2.53 (s, 3H).  $^{13}\text{C}$  NMR (101 MHz,  $\text{CDCl}_3$ )  $\delta$  169.65, 150.58, 143.08, 139.38, 130.11, 129.27, 128.34, 127.82, 127.07,

115.61, 110.39, 38.79, 38.66, 29.81, 26.53. ESI-MS: calculated  $\text{C}_{17}\text{H}_{22}\text{N}_3\text{O}_3\text{S}$   $[\text{M}+\text{H}]^+$  348.1382; Found 348.1386.

## 3. Procedure for the synthesis of product 7<sup>[4]</sup>

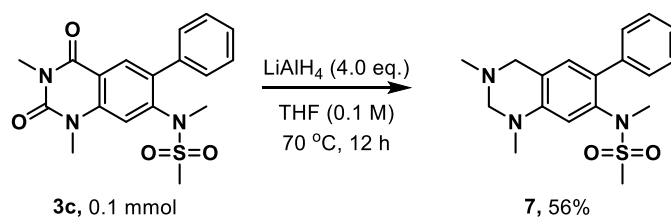

To a dry Schlenk tube containing compound **3c** (37.3 mg, 0.1 mmol, 1.0 equiv) in THF (1.0 mL, 0.1 M) was added LiAlH<sub>4</sub> (15.2 mg, 0.40 mmol, 4.0 equiv) at 0 °C. The resulting mixture was allowed for stir 12 h at 70 °C (pre-heated oil bath was used). Then to the solution two drops of saturated NH<sub>4</sub>Cl solution was added and was purified by flash column chromatography on silica gel using petroleum ether/EtOAc (70:30) to afford **6** (19.3 mg, 56%) as a white oil.

***N*-(1,3-dimethyl-6-phenyl-1,2,3,4-tetrahydroquinazolin-7-yl)-*N*-methylmethanesulfonamide (7)**

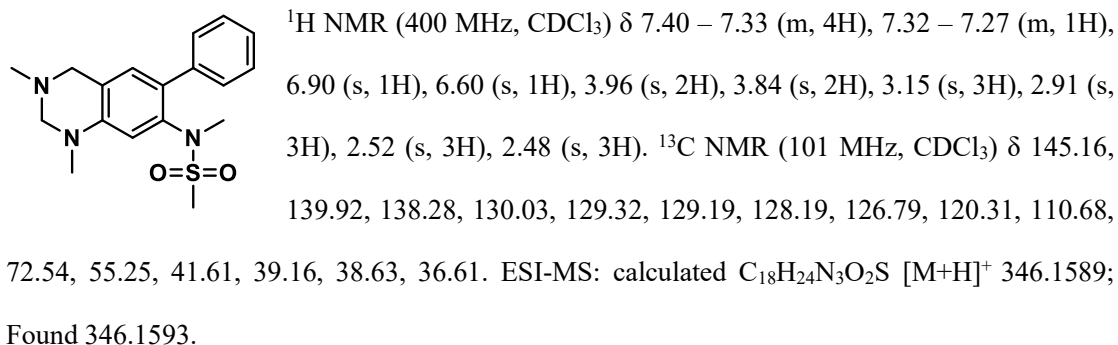

**4. Procedure for the synthesis of product 9<sup>[5]</sup>.**

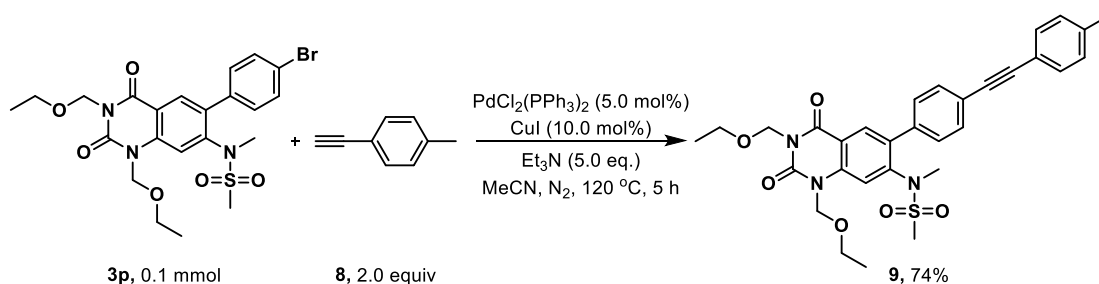

To a solution of **3p** (53.9 mg, 0.1 mmol, 1.0 equiv) in CH<sub>3</sub>CN (0.4 mL, 0.2 M) and NEt<sub>3</sub> (1.0 mL, 0.1 M) were added Pd(PPh<sub>3</sub>)<sub>2</sub>Cl<sub>2</sub> (7.0 mg, 0.01 mmol, 10 mol%), CuI (1.0 mg, 0.005 mmol, 5 mol%), and 1-ethynyl-4-methylbenzene **8** (23.0 mg 0.2mmol, 2.0 equiv) under N<sub>2</sub>. After being stirred at 120 °C for 5 h, the reaction mixture was concentrated in vacuo. The residue was purified

by column chromatography on silica gel (Petroleum ether/EtOAc = 1/1, v/v) to give **9** (42.6 mg, 74%) as a yellow oil.

***N*-(1,3-bis(ethoxymethyl)-2,4-dioxo-6-(4-(*p*-tolylethynyl)phenyl)-1,2,3,4-tetrahydroquinazolin-7-yl)-*N*-methylmethanesulfonamide (**9**)**

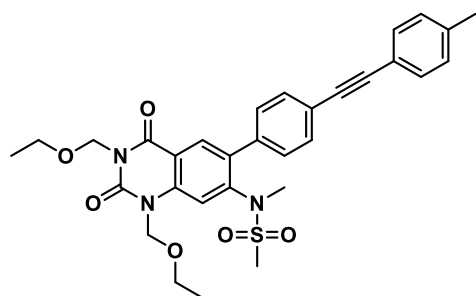

$^1\text{H}$  NMR (400 MHz,  $\text{CDCl}_3$ )  $\delta$  8.23 (s, 1H), 7.61 (d,  $J$  = 7.9 Hz, 2H), 7.51 (s, 1H), 7.47 – 7.37 (m, 4H), 7.17 (d,  $J$  = 7.8 Hz, 2H), 5.64 (s, 2H), 5.58 (s, 2H), 3.70 (q,  $J$  = 7.0 Hz, 4H), 3.13 (s, 3H), 2.69 (s, 3H), 2.38 (s, 3H), 1.23 (td,  $J$  = 7.1, 2.8 Hz, 6H).  $^{13}\text{C}$  NMR (101 MHz,  $\text{CDCl}_3$ )  $\delta$  161.16, 151.25, 145.74, 139.79, 138.71, 137.35, 136.70, 131.77, 131.72, 131.56, 129.20, 129.13, 123.42, 119.91, 115.39, 115.26, 90.86, 88.18, 73.98, 71.21, 66.00, 64.81, 39.00, 38.69, 21.56, 15.22, 15.01. ESI-MS: calculated  $\text{C}_{31}\text{H}_{33}\text{N}_3\text{O}_6\text{SNa}$   $[\text{M}+\text{Na}]^+$  598.1988; Found 598.1983.

**5. Procedure for the synthesis of product **11**<sup>[6]</sup>.**

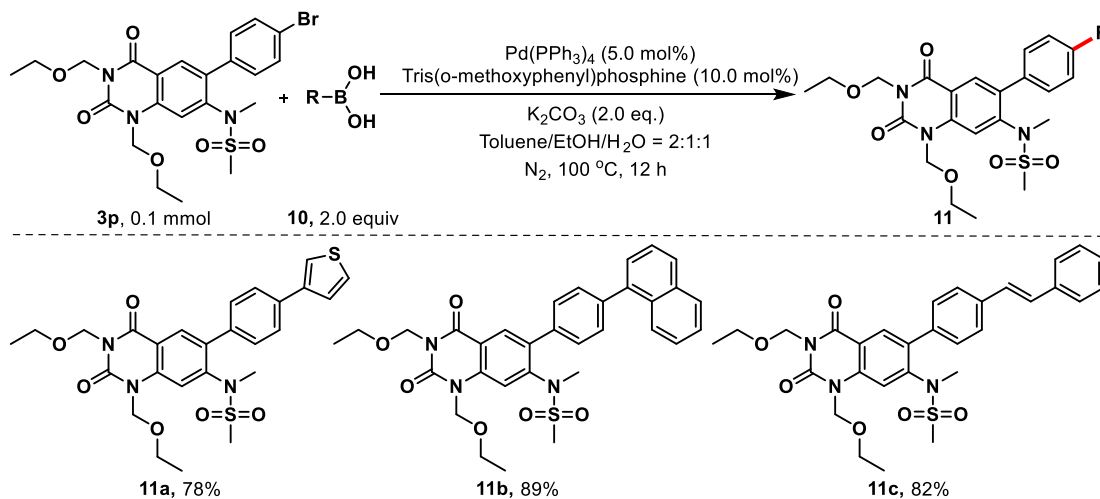

To a solution of **3p** (53.9 mg, 0.1 mmol, 1.0 equiv) in toluene (1.0 mL) was added phenylboronic acid **10** (0.2 mmol, 2.0 equiv.),  $\text{Pd}(\text{PPh}_3)_4$  (5.8 mg, 0.05 mmol, 5.0 mol%), tris(*o*-methoxyphenyl)phosphine (3.6 mg, 0.01 mmol, 10.0 mol%),  $\text{K}_2\text{CO}_3$  (27.6 mg, 0.2 mmol, 2.0 equiv.). Absolute EtOH (0.5 mL) and  $\text{H}_2\text{O}$  (0.5 mL) was then added to the reaction mixture. The resulting mixture was degassed with  $\text{N}_2$  and then heated to 100 °C (oil bath) for 12 h. After cooling to room temperature, the organic layer was separated and the sodium chloride aqueous solution fraction was extracted with EtOAc. The organic fractions were dried over  $\text{Na}_2\text{SO}_4$ . Removal of the solvents in

vacuo gave a crude mixture that was purified by column chromatography (n-hexane/EtOAc = 2/1-1/1, v/v) to afford the product **11** as a yellow oil.

***N*-(1,3-bis(ethoxymethyl)-2,4-dioxo-6-(4-(thiophen-3-yl)phenyl)-1,2,3,4-tetrahydroquinazolin-7-yl)-*N*-methylmethanesulfonamide (11a)**

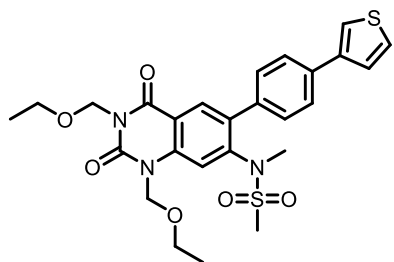

Following the above procedure, the product **11a** was obtained in 78% yield (42.4 mg, 8 h) as a yellow oil after column chromatography (eluent = Petroleum ether/EtOAc 2:1 - 1:1 v/v).  $R_f$  (Petroleum ether/EtOAc 2:1): 0.2,  $^1\text{H NMR}$  (400 MHz,  $\text{CDCl}_3$ )  $\delta$  8.26 (s, 1H), 7.71 (s, 1H), 7.69 (s, 1H), 7.52 (d,  $J$  = 3.2 Hz, 2H), 7.47 (d,  $J$  = 8.0 Hz, 2H), 7.43 (d,  $J$  = 3.1 Hz, 2H), 5.64 (s, 2H), 5.58 (s, 2H), 3.71 (q,  $J$  = 7.0 Hz, 4H), 3.15 (s, 3H), 2.69 (s, 3H), 1.23 (td,  $J$  = 7.1, 3.6 Hz, 6H).  $^{13}\text{C NMR}$  (101 MHz,  $\text{CDCl}_3$ )  $\delta$  161.21, 151.28, 145.81, 141.41, 139.62, 136.93, 136.38, 135.51, 131.66, 129.59, 126.57, 126.50, 126.14, 120.80, 115.37, 115.26, 73.98, 71.20, 65.99, 64.80, 39.03, 38.70, 15.23, 15.01. ESI-MS: calculated  $\text{C}_{26}\text{H}_{29}\text{N}_3\text{O}_6\text{S}_2\text{Na}$   $[\text{M}+\text{Na}]^+$  566.1395; Found 566.1398.

***N*-(1,3-bis(ethoxymethyl)-6-(4-(naphthalen-1-yl)phenyl)-2,4-dioxo-1,2,3,4-tetrahydroquinazolin-7-yl)-*N*-methylmethanesulfonamide (11b)**

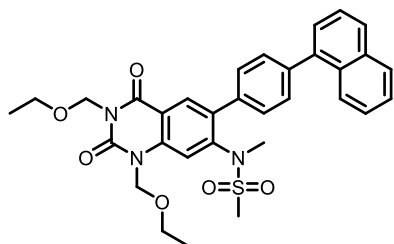

Following the above procedure, the product **11b** was obtained in 89% yield (52.3 mg, 12 h) as a yellow oil after column chromatography (eluent = Petroleum ether/EtOAc 2:1 - 1:1 v/v).  $R_f$  (Petroleum ether/EtOAc 1:1): 0.2,  $^1\text{H NMR}$  (400 MHz,  $\text{CDCl}_3$ )  $\delta$  8.34 (s, 1H), 7.91 (q,  $J$  = 8.2, 7.6 Hz, 3H), 7.61 (d,  $J$  = 8.2 Hz, 2H), 7.58 (s, 1H), 7.57 – 7.53 (m, 3H), 7.51 (d,  $J$  = 7.4 Hz, 1H), 7.47 (t,  $J$  = 6.7 Hz, 2H), 5.66 (s, 2H), 5.60 (s, 2H), 3.73 (qd,  $J$  = 7.1, 2.3 Hz, 4H), 3.23 (s, 3H), 2.74 (s, 3H), 1.34 – 1.15 (m, 6H).  $^{13}\text{C NMR}$  (101 MHz,  $\text{CDCl}_3$ )  $\delta$  161.22, 151.32, 145.89, 140.66, 139.71, 139.36, 137.08, 136.70, 133.86, 131.82, 131.43, 130.30, 129.09, 128.45, 128.02, 127.10, 126.29, 125.92, 125.67, 125.41, 115.44, 115.32, 74.00, 71.22, 66.01, 64.83, 38.98, 38.84, 15.24, 15.03. ESI-MS: calculated  $\text{C}_{32}\text{H}_{34}\text{N}_3\text{O}_6\text{S}$   $[\text{M}+\text{H}]^+$  588.2168; Found 588.2163.

**(E)-N-(1,3-bis(ethoxymethyl)-2,4-dioxo-6-(4-styrylphenyl)-1,2,3,4-tetrahydroquinazolin-7-yl)-N-methylmethanesulfonamide (11c)**

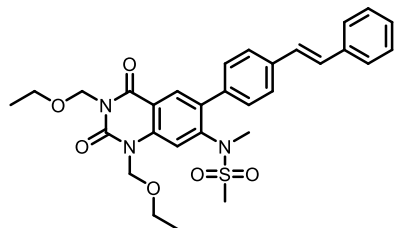

Following the above procedure, the product **11c** was obtained in 82% yield (46.2 mg, 8 h) as a yellow oil after column chromatography (eluent = Petroleum ether/EtOAc 2:1 - 1:1 v/v).  $R_f$  (Petroleum ether/EtOAc 1:1): 0.2,  $^1\text{H NMR}$  (400 MHz,  $\text{CDCl}_3$ )  $\delta$  8.25 (s, 1H), 7.61 (d,  $J = 8.2$  Hz, 2H), 7.56 – 7.49 (m, 3H), 7.44 (d,  $J = 8.1$  Hz, 2H), 7.38 (t,  $J = 7.6$  Hz, 2H), 7.28 (t,  $J = 7.1$  Hz, 1H), 7.19 (d,  $J = 16.4$  Hz, 1H), 7.13 (d,  $J = 16.3$  Hz, 1H), 5.64 (s, 2H), 5.58 (s, 2H), 3.71 (q,  $J = 7.0$  Hz, 4H), 3.15 (s, 3H), 2.69 (s, 3H), 1.23 (td,  $J = 7.0, 3.0$  Hz, 6H).  $^{13}\text{C NMR}$  (101 MHz,  $\text{CDCl}_3$ )  $\delta$  161.21, 151.28, 145.80, 139.60, 137.16, 137.07, 136.96, 136.79, 131.62, 129.60, 129.45, 128.77, 127.92, 127.80, 126.67, 126.62, 115.39, 115.25, 73.98, 71.20, 65.99, 64.80, 39.04, 38.69, 15.23, 15.01. ESI-MS: calculated  $\text{C}_{30}\text{H}_{33}\text{N}_3\text{O}_6\text{SNa}$   $[\text{M}+\text{Na}]^+$  586.1988; Found 586.1981.

## 5. Mechanistic studies

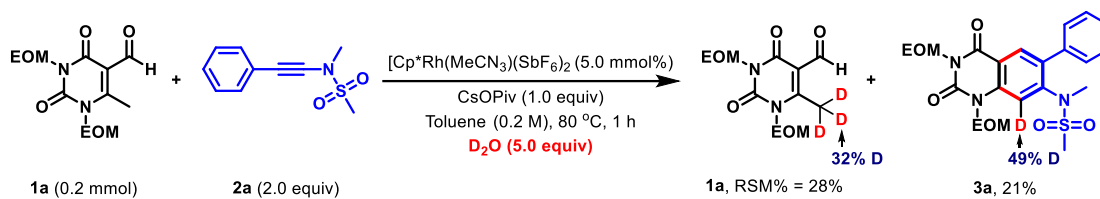

In an oven-dried Schlenk tube, a mixture of the 6-Methyluracil-5-carbaldehyde derivatives **1a** (0.2 mmol, 1.0 equiv), *N*-methyl-*N*-(phenylethynyl)methanesulfonamide **2a** (0.4 mmol, 2.0 equiv),  $[\text{Cp}^*\text{Rh}(\text{MeCN})_3](\text{SbF}_6)_2$  (5.0 mol%),  $\text{D}_2\text{O}$  (5.0 equiv), CsOPiv (0.2 mmol, 1.0 equiv) and Toluene (1.0 mL, 0.2 M) was stirred at 80 °C in the oil bath for 1.0 h. The reaction mixture was then diluted with DCM (10.0 mL) and washed with  $\text{H}_2\text{O}$ . The aqueous phase was extracted with DCM again. The organic layers were combined, washed with brine and dried over  $\text{Na}_2\text{SO}_4$ . The product was purified by flash column chromatography on silica with an appropriate solvent to afford the starting material **1a** (16.2 mg, RSM% = 28%). Afford the pure product **3a** (19.4 mg, 21%) as a yellow oil.

$^1\text{H}$  NMR (400 MHz,  $\text{CDCl}_3$ ) Spectra of **1a**

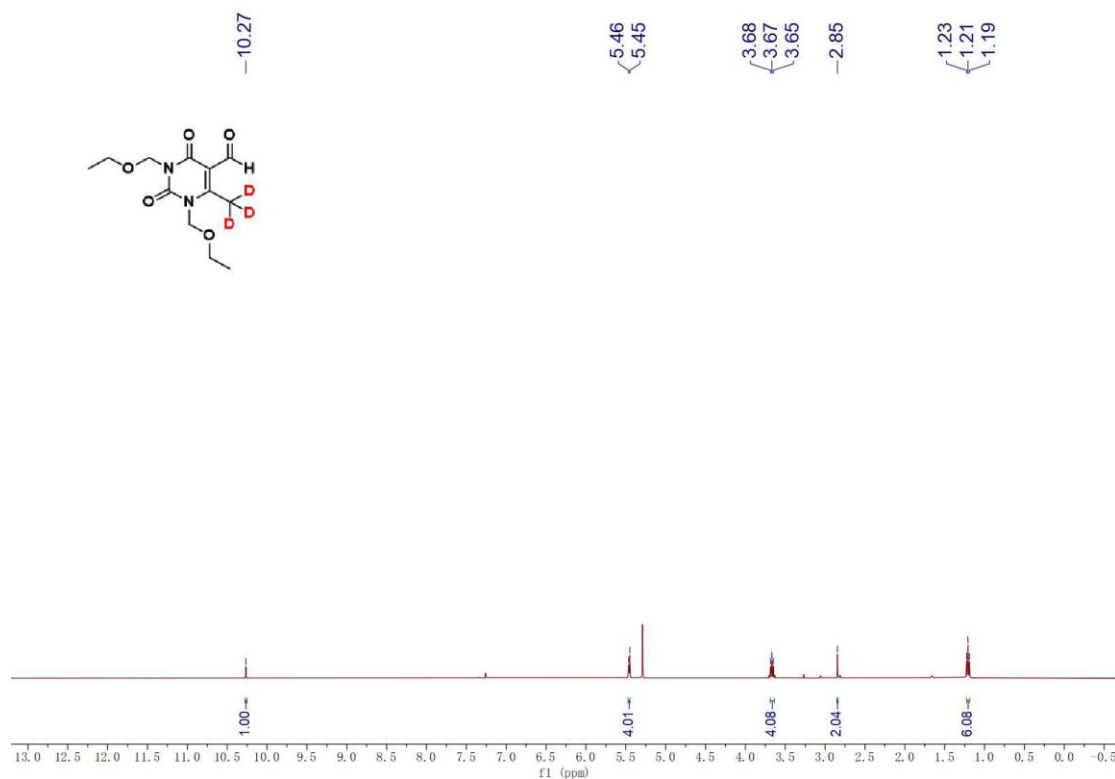

### <sup>1</sup>H NMR (400 MHz, CDCl<sub>3</sub>) Spectra of **3a**

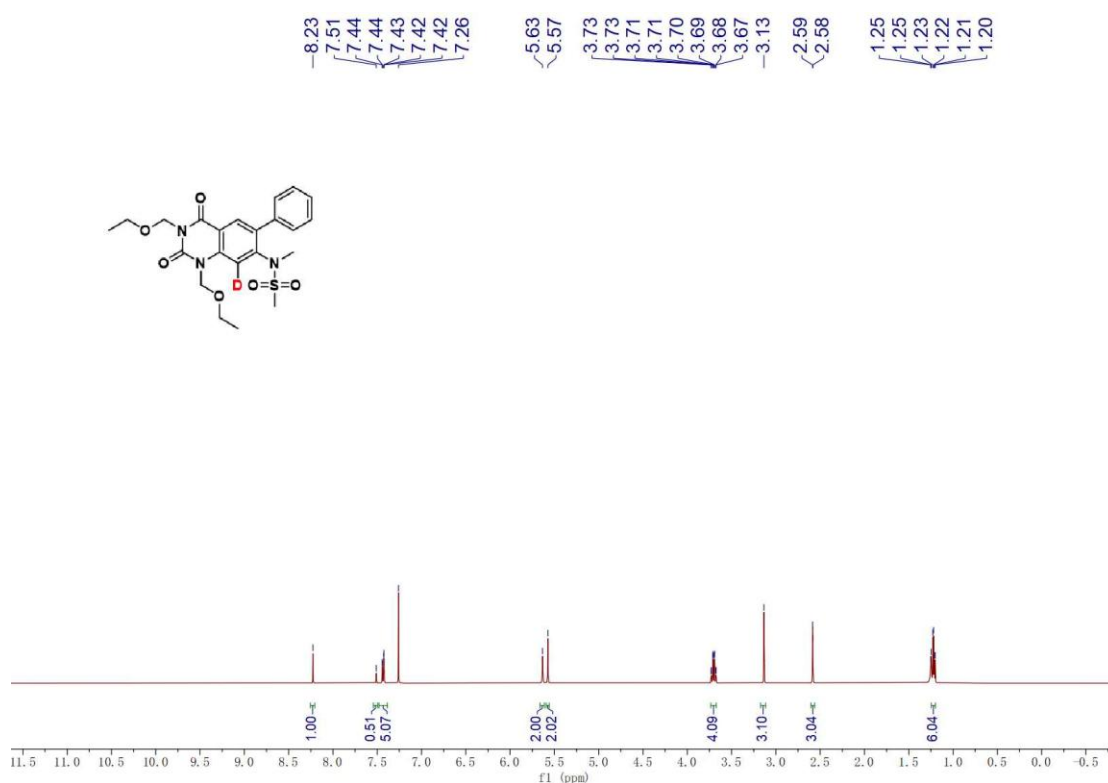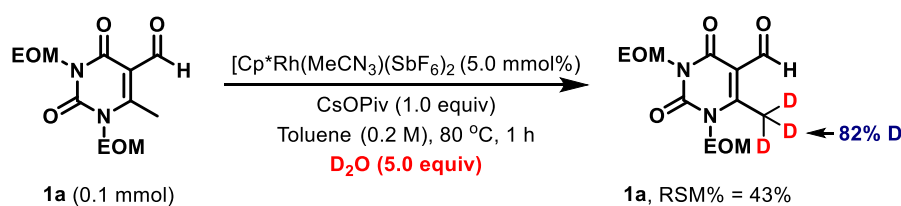

In an oven-dried Schlenk tube, a mixture of the 6-Methyluracil-5-carbaldehyde derivatives **1a** (0.1 mmol, 1.0 equiv),  $[\text{Cp}^*\text{Rh}(\text{MeCN})_3(\text{SbF}_6)_2$  (5.0 mol%),  $\text{D}_2\text{O}$  (5.0 equiv), CsOPiv (0.1 mmol, 1.0 equiv) and Toluene (0.5 mL, 0.2 M) was stirred at 80 °C in the oil bath for 1.0 h. The reaction mixture was then diluted with DCM (10.0 mL) and washed with  $\text{H}_2\text{O}$ . The aqueous phase was extracted with DCM again. The organic layers were combined, washed with brine and dried over  $\text{Na}_2\text{SO}_4$ . The product was purified by flash column chromatography on silica with an appropriate solvent to afford the starting material **1a** (11.5 mg, RSM% = 43%).

<sup>1</sup>H NMR (400 MHz, CDCl<sub>3</sub>) Spectra of **1a**

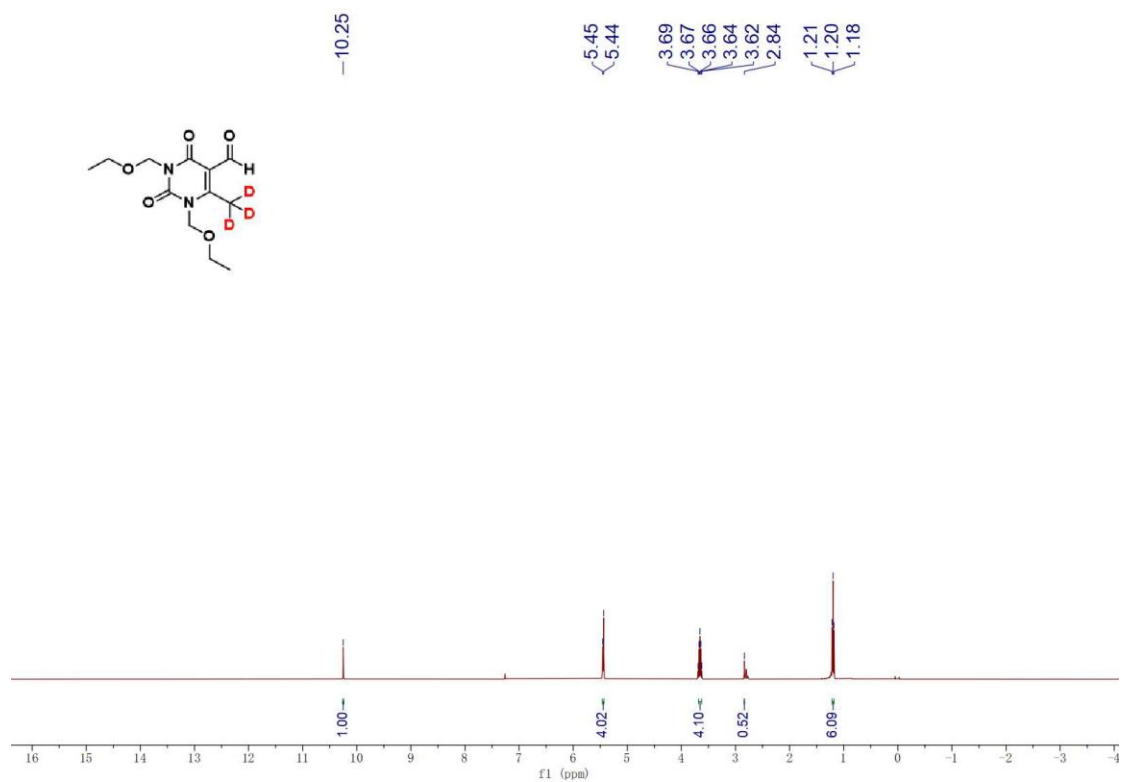

## 6. Single-Crystal X-ray of **3s**

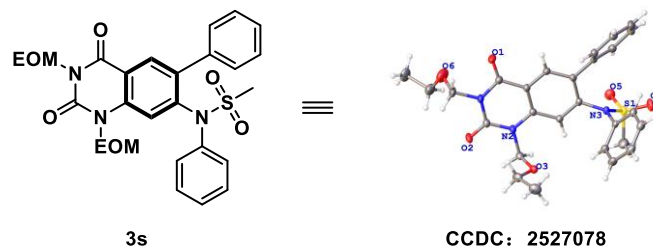

The crystal structure of **3s** by X-ray analysis.

X-ray-quality crystal was obtained by slow diffusion of petroleum ether into a dilute dichloromethane mixture solution of **3s** at room temperature under air. Thermal ellipsoids drawn at the 50% probability level. Crystal data were obtained on a SuperNova, Dual, Cu at zero, AtlasS2 diffractometer using Mo K $\alpha$  radiation ( $\lambda = 0.71073 \text{ \AA}$ ). The crystal was kept at 200.00(10) K during data collection.

**Table 1 Crystal data and structure refinement for **3s**.**

|                        |                                                                 |
|------------------------|-----------------------------------------------------------------|
| Identification code    | <b>3s</b>                                                       |
| Empirical formula      | C <sub>27</sub> H <sub>29</sub> N <sub>3</sub> O <sub>6</sub> S |
| Formula weight         | 523.59                                                          |
| Temperature/K          | 150.00(10)                                                      |
| Crystal system         | monoclinic                                                      |
| Space group            | P2 <sub>1</sub> /c                                              |
| a/ $\text{\AA}$        | 14.34920(10)                                                    |
| b/ $\text{\AA}$        | 10.29990(10)                                                    |
| c/ $\text{\AA}$        | 17.91330(10)                                                    |
| $\alpha$ / $^\circ$    | 90                                                              |
| $\beta$ / $^\circ$     | 104.5770(10)                                                    |
| $\gamma$ / $^\circ$    | 90                                                              |
| Volume/ $\text{\AA}^3$ | 2562.28(4)                                                      |
| Z                      | 4                                                               |

|                                                |                                                               |
|------------------------------------------------|---------------------------------------------------------------|
| $\rho_{\text{calc}}/\text{cm}^3$               | 1.357                                                         |
| $\mu/\text{mm}^{-1}$                           | 1.524                                                         |
| F(000)                                         | 1104.0                                                        |
| Crystal size/ $\text{mm}^3$                    | $0.13 \times 0.12 \times 0.1$                                 |
| Radiation                                      | Cu K $\alpha$ ( $\lambda = 1.54184$ )                         |
| 2 $\Theta$ range for data collection/ $^\circ$ | 9.99 to 145.706                                               |
| Index ranges                                   | $-17 \leq h \leq 13, -12 \leq k \leq 11, -21 \leq l \leq 22$  |
| Reflections collected                          | 19963                                                         |
| Independent reflections                        | 4949 [ $R_{\text{int}} = 0.0149, R_{\text{sigma}} = 0.0099$ ] |
| Data/restraints/parameters                     | 4949/41/365                                                   |
| Goodness-of-fit on $F^2$                       | 1.057                                                         |
| Final R indexes [ $I \geq 2\sigma(I)$ ]        | $R_1 = 0.0408, wR_2 = 0.0997$                                 |
| Final R indexes [all data]                     | $R_1 = 0.0414, wR_2 = 0.1002$                                 |
| Largest diff. peak/hole / $e \text{ \AA}^{-3}$ | 0.52/-0.46                                                    |

### Crystal structure determination of 3s

**Crystal Data** for  $\text{C}_{27}\text{H}_{29}\text{N}_3\text{O}_6\text{S}$  ( $M = 523.59 \text{ g/mol}$ ): monoclinic, space group  $P2_1/c$  (no. 14),  $a = 14.34920(10) \text{ \AA}$ ,  $b = 10.29990(10) \text{ \AA}$ ,  $c = 17.91330(10) \text{ \AA}$ ,  $\beta = 104.5770(10)^\circ$ ,  $V = 2562.28(4) \text{ \AA}^3$ ,  $Z = 4$ ,  $T = 150.00(10) \text{ K}$ ,  $\mu(\text{Cu K}\alpha) = 1.524 \text{ mm}^{-1}$ ,  $D_{\text{calc}} = 1.357 \text{ g/cm}^3$ , 19963 reflections measured ( $9.99^\circ \leq 2\Theta \leq 145.706^\circ$ ), 4949 unique ( $R_{\text{int}} = 0.0149, R_{\text{sigma}} = 0.0099$ ) which were used in all calculations. The final  $R_1$  was 0.0408 ( $I > 2\sigma(I)$ ) and  $wR_2$  was 0.1002 (all data).

### Refinement model description

**Table 2 Fractional Atomic Coordinates ( $\times 10^4$ ) and Equivalent Isotropic Displacement**

**Parameters ( $\text{\AA}^2 \times 10^3$ ) for 3s.  $U_{\text{eq}}$  is defined as 1/3 of the trace of the orthogonalised  $U_{ij}$  tensor.**

| Atom | x         | y          | z         | U(eq)     |
|------|-----------|------------|-----------|-----------|
| S1   | 2675.7(3) | -201.4(4)  | 1985.6(2) | 25.04(11) |
| O1   | 2591.7(9) | 5780.4(13) | 4376.7(7) | 38.1(3)   |
| O2   | 4733.0(9) | 6948.2(11) | 3010.8(8) | 34.6(3)   |
| O3   | 3651.9(8) | 4854.6(10) | 1328.7(6) | 25.8(2)   |

**Table 2 Fractional Atomic Coordinates ( $\times 10^4$ ) and Equivalent Isotropic Displacement Parameters ( $\text{\AA}^2 \times 10^3$ ) for 3s.  $U_{\text{eq}}$  is defined as 1/3 of the trace of the orthogonalised  $U_{ij}$  tensor.**

| Atom | <i>x</i>   | <i>y</i>    | <i>z</i>   | $U(\text{eq})$ |
|------|------------|-------------|------------|----------------|
| O4   | 2031.9(9)  | -1269.5(11) | 1752.6(8)  | 37.2(3)        |
| O5   | 3314.1(9)  | -189.8(12)  | 2740.7(7)  | 35.2(3)        |
| O6   | 4414.0(13) | 7456(2)     | 4845.9(10) | 71.1(5)        |
| N1   | 3641.8(10) | 6381.5(13)  | 3681.1(8)  | 25.6(3)        |
| N2   | 3926.0(9)  | 5050.1(12)  | 2687.0(7)  | 21.9(3)        |
| N3   | 2033.7(9)  | 1120.4(12)  | 1925.4(7)  | 20.7(3)        |
| C1   | 2734.0(11) | 4393.5(15)  | 3356.3(8)  | 22.0(3)        |
| C2   | 2958.5(11) | 5543.9(16)  | 3849.6(9)  | 25.4(3)        |
| C3   | 4136.2(11) | 6174.4(15)  | 3112.3(9)  | 24.2(3)        |
| C4   | 3240.5(10) | 4154.3(14)  | 2799.1(8)  | 20.1(3)        |
| C5   | 3036.2(10) | 3027.2(14)  | 2354.1(8)  | 20.6(3)        |
| C6   | 2320.8(10) | 2191.7(14)  | 2452.4(8)  | 19.7(3)        |
| C7   | 1794.5(10) | 2427.3(15)  | 3004.9(8)  | 21.3(3)        |
| C8   | 2020.1(11) | 3536.9(15)  | 3450.3(8)  | 23.6(3)        |
| C9   | 4360.0(11) | 4870.5(15)  | 2027.2(9)  | 24.3(3)        |
| C10  | 3239.5(13) | 6104.7(17)  | 1096.6(11) | 33.9(4)        |
| C11  | 2430.2(15) | 5924(2)     | 389.4(12)  | 44.9(5)        |
| C12  | 1015.0(11) | 1547.8(15)  | 3111.5(8)  | 22.3(3)        |
| C13  | 80.2(11)   | 2013.7(16)  | 3004.7(9)  | 26.0(3)        |
| C14  | -649.0(13) | 1205.6(18)  | 3116.5(10) | 32.7(4)        |
| C15  | -445.8(14) | -58.1(18)   | 3351.6(11) | 37.1(4)        |
| C16  | 485.3(15)  | -528.5(17)  | 3474.2(10) | 36.1(4)        |
| C17  | 1213.6(13) | 263.0(16)   | 3348.4(9)  | 27.9(3)        |
| C18  | 1273.1(11) | 1392.3(14)  | 1239.0(8)  | 20.6(3)        |
| C19  | 370.9(11)  | 849.7(16)   | 1156.4(9)  | 25.4(3)        |

**Table 2 Fractional Atomic Coordinates ( $\times 10^4$ ) and Equivalent Isotropic Displacement Parameters ( $\text{\AA}^2 \times 10^3$ ) for 3s.  $U_{\text{eq}}$  is defined as 1/3 of the trace of the orthogonalised  $U_{ij}$  tensor.**

| Atom | x          | y          | z          | U(eq)    |
|------|------------|------------|------------|----------|
| C20  | -357.1(12) | 1151.6(17) | 507.0(10)  | 31.1(4)  |
| C21  | -184.4(13) | 1994.9(17) | -45.6(10)  | 33.0(4)  |
| C22  | 716.3(13)  | 2544.9(17) | 46.5(9)    | 33.0(4)  |
| C23  | 1452.8(12) | 2239.1(16) | 686.6(9)   | 27.8(3)  |
| C24  | 3356.7(14) | -60.0(19)  | 1297.5(11) | 38.3(4)  |
| C25  | 3829.3(17) | 7595(2)    | 4131.5(12) | 44.1(5)  |
| C26  | 5430(3)    | 7671(4)    | 4866.2(19) | 57.5(11) |
| C27  | 5863(2)    | 8411(4)    | 5589.4(19) | 49.3(9)  |
| C28  | 5921(11)   | 7933(16)   | 5204(11)   | 103(4)   |
| C29  | 5218(8)    | 6767(14)   | 4942(8)    | 92(2)    |

**Table 3 Anisotropic Displacement Parameters ( $\text{\AA}^2 \times 10^3$ ) for 3s. The Anisotropic displacement factor exponent takes the form:  $-2\pi^2[h^2a^{*2}U_{11}+2hka^*b^*U_{12}+\dots]$ .**

| Atom | $U_{11}$ | $U_{22}$  | $U_{33}$ | $U_{23}$  | $U_{13}$ | $U_{12}$ |
|------|----------|-----------|----------|-----------|----------|----------|
| S1   | 23.5(2)  | 18.77(19) | 31.9(2)  | -2.05(14) | 5.19(15) | 1.96(14) |
| O1   | 45.5(7)  | 38.8(7)   | 37.2(7)  | -17.7(6)  | 23.7(6)  | -16.3(6) |
| O2   | 36.9(6)  | 24.6(6)   | 48.2(7)  | -10.6(5)  | 21.4(6)  | -12.8(5) |
| O3   | 31.4(6)  | 20.6(5)   | 27.3(6)  | -0.5(4)   | 11.0(5)  | 1.4(4)   |
| O4   | 34.2(6)  | 17.7(6)   | 58.1(8)  | -5.4(5)   | 8.3(6)   | -1.6(5)  |
| O5   | 30.7(6)  | 35.4(7)   | 35.2(7)  | 2.7(5)    | 0.3(5)   | 8.8(5)   |
| O6   | 65.6(10) | 92.1(14)  | 52.4(9)  | -30.3(9)  | 8.7(7)   | -28.1(9) |
| N1   | 29.1(7)  | 20.8(6)   | 28.4(7)  | -7.3(5)   | 10.3(5)  | -6.1(5)  |
| N2   | 21.5(6)  | 19.2(6)   | 26.5(6)  | -3.8(5)   | 9.0(5)   | -3.5(5)  |
| N3   | 22.6(6)  | 17.0(6)   | 20.7(6)  | -2.7(5)   | 2.3(5)   | -0.1(5)  |

**Table 3 Anisotropic Displacement Parameters ( $\text{\AA}^2 \times 10^3$ ) for 3s. The Anisotropic displacement factor exponent takes the form:  $-2\pi^2[h^2a^{*2}U_{11}+2hka^*b^*U_{12}+\dots]$ .**

| Atom | U <sub>11</sub> | U <sub>22</sub> | U <sub>33</sub> | U <sub>23</sub> | U <sub>13</sub> | U <sub>12</sub> |
|------|-----------------|-----------------|-----------------|-----------------|-----------------|-----------------|
| C1   | 22.7(7)         | 21.5(7)         | 21.5(7)         | -2.9(6)         | 4.8(6)          | -2.8(6)         |
| C2   | 25.6(8)         | 25.7(8)         | 25.5(8)         | -5.2(6)         | 7.4(6)          | -4.4(6)         |
| C3   | 22.8(7)         | 20.5(7)         | 29.6(8)         | -2.9(6)         | 7.2(6)          | -1.8(6)         |
| C4   | 18.2(7)         | 20.1(7)         | 21.3(7)         | 0.4(6)          | 3.5(5)          | -1.0(5)         |
| C5   | 20.6(7)         | 20.4(7)         | 20.8(7)         | -1.3(6)         | 5.2(5)          | 0.0(6)          |
| C6   | 21.4(7)         | 16.8(7)         | 19.1(7)         | -0.9(5)         | 1.9(5)          | 0.2(5)          |
| C7   | 22.1(7)         | 21.1(7)         | 19.8(7)         | 0.5(6)          | 3.5(5)          | -2.7(6)         |
| C8   | 25.8(7)         | 24.9(8)         | 21.2(7)         | -2.9(6)         | 8.0(6)          | -3.4(6)         |
| C9   | 22.5(7)         | 22.5(8)         | 31.0(8)         | -2.8(6)         | 12.7(6)         | -0.9(6)         |
| C10  | 40.7(10)        | 24.9(8)         | 39.4(9)         | 5.2(7)          | 16.4(8)         | 7.1(7)          |
| C11  | 42.8(11)        | 47.3(12)        | 44.3(11)        | 12.5(9)         | 10.0(9)         | 8.6(9)          |
| C12  | 27.8(8)         | 22.5(7)         | 17.0(7)         | -2.3(6)         | 6.4(6)          | -6.8(6)         |
| C13  | 29.3(8)         | 24.6(8)         | 24.7(7)         | -2.9(6)         | 7.6(6)          | -5.1(6)         |
| C14  | 29.1(8)         | 38.2(10)        | 33.0(9)         | -8.3(7)         | 11.7(7)         | -10.5(7)        |
| C15  | 45.0(10)        | 35.8(10)        | 36.0(9)         | -8.5(8)         | 20.6(8)         | -21.2(8)        |
| C16  | 58.4(12)        | 22.6(8)         | 30.8(9)         | 0.8(7)          | 17.4(8)         | -10.1(8)        |
| C17  | 35.6(9)         | 25.1(8)         | 23.2(8)         | 0.9(6)          | 8.2(6)          | -2.0(7)         |
| C18  | 23.5(7)         | 18.4(7)         | 18.7(7)         | -4.1(5)         | 3.0(6)          | 1.6(6)          |
| C19  | 25.9(8)         | 23.5(8)         | 26.6(8)         | -4.5(6)         | 6.2(6)          | -0.5(6)         |
| C20  | 24.4(8)         | 33.9(9)         | 32.5(8)         | -8.9(7)         | 2.4(6)          | 2.2(7)          |
| C21  | 35.8(9)         | 33.8(9)         | 24.6(8)         | -5.4(7)         | -1.4(7)         | 11.1(7)         |
| C22  | 46.6(10)        | 29.3(9)         | 21.7(8)         | 1.9(6)          | 6.0(7)          | 3.4(8)          |
| C23  | 32.6(8)         | 25.9(8)         | 24.6(8)         | -1.3(6)         | 6.6(6)          | -2.6(7)         |
| C24  | 35.5(9)         | 39.0(10)        | 45.0(10)        | -10.0(8)        | 18.9(8)         | 3.2(8)          |
| C25  | 60.6(12)        | 32.4(10)        | 45.9(10)        | -20.6(8)        | 25.5(9)         | -20.1(9)        |

**Table 3 Anisotropic Displacement Parameters ( $\text{\AA}^2 \times 10^3$ ) for 3s. The Anisotropic displacement factor exponent takes the form:  $-2\pi^2[h^2a^{*2}U_{11}+2hka^*b^*U_{12}+\dots]$ .**

| Atom | $U_{11}$ | $U_{22}$ | $U_{33}$ | $U_{23}$  | $U_{13}$  | $U_{12}$  |
|------|----------|----------|----------|-----------|-----------|-----------|
| C26  | 67.0(17) | 64(2)    | 42.3(17) | -19.8(15) | 15.1(15)  | -25.9(17) |
| C27  | 42.4(16) | 53.5(19) | 39.1(17) | -10.6(14) | -13.8(12) | -6.5(14)  |
| C28  | 92(6)    | 96(5)    | 117(8)   | 40(5)     | 19(6)     | -13(5)    |
| C29  | 92(2)    | 93(2)    | 93(2)    | -0.2(10)  | 25.8(11)  | -1.3(10)  |

**Table 4 Bond Lengths for 3s.**

| Atom | Atom | Length/ $\text{\AA}$ | Atom | Atom | Length/ $\text{\AA}$ |
|------|------|----------------------|------|------|----------------------|
| S1   | O4   | 1.4296(12)           | C1   | C8   | 1.394(2)             |
| S1   | O5   | 1.4301(13)           | C4   | C5   | 1.397(2)             |
| S1   | N3   | 1.6321(13)           | C5   | C6   | 1.384(2)             |
| S1   | C24  | 1.7611(18)           | C6   | C7   | 1.409(2)             |
| O1   | C2   | 1.216(2)             | C7   | C8   | 1.385(2)             |
| O2   | C3   | 1.2166(19)           | C7   | C12  | 1.488(2)             |
| O3   | C9   | 1.3995(19)           | C10  | C11  | 1.499(3)             |
| O3   | C10  | 1.434(2)             | C12  | C13  | 1.392(2)             |
| O6   | C25  | 1.350(3)             | C12  | C17  | 1.397(2)             |
| O6   | C26  | 1.467(4)             | C13  | C14  | 1.390(2)             |
| O6   | C29  | 1.328(11)            | C14  | C15  | 1.376(3)             |
| N1   | C2   | 1.395(2)             | C15  | C16  | 1.386(3)             |
| N1   | C3   | 1.397(2)             | C16  | C17  | 1.388(2)             |
| N1   | C25  | 1.475(2)             | C18  | C19  | 1.384(2)             |
| N2   | C3   | 1.3772(19)           | C18  | C23  | 1.391(2)             |
| N2   | C4   | 1.3994(19)           | C19  | C20  | 1.389(2)             |
| N2   | C9   | 1.4797(19)           | C20  | C21  | 1.385(3)             |

**Table 4 Bond Lengths for 3s.**

| Atom | Atom | Length/Å   | Atom | Atom | Length/Å  |
|------|------|------------|------|------|-----------|
| N3   | C6   | 1.4431(18) | C21  | C22  | 1.382(3)  |
| N3   | C18  | 1.4512(18) | C22  | C23  | 1.386(2)  |
| C1   | C2   | 1.465(2)   | C26  | C27  | 1.497(4)  |
| C1   | C4   | 1.397(2)   | C28  | C29  | 1.563(14) |

**Table 5 Bond Angles for 3s.**

| Atom | Atom | Atom | Angle/°    | Atom | Atom | Atom | Angle/°    |
|------|------|------|------------|------|------|------|------------|
| O4   | S1   | O5   | 119.71(8)  | C6   | C5   | C4   | 119.99(13) |
| O4   | S1   | N3   | 108.07(7)  | C5   | C6   | N3   | 119.40(13) |
| O4   | S1   | C24  | 106.91(9)  | C5   | C6   | C7   | 121.87(13) |
| O5   | S1   | N3   | 105.78(7)  | C7   | C6   | N3   | 118.42(13) |
| O5   | S1   | C24  | 108.97(9)  | C6   | C7   | C12  | 122.56(13) |
| N3   | S1   | C24  | 106.75(8)  | C8   | C7   | C6   | 117.25(13) |
| C9   | O3   | C10  | 113.72(12) | C8   | C7   | C12  | 120.18(13) |
| C25  | O6   | C26  | 112.6(2)   | C7   | C8   | C1   | 121.69(14) |
| C29  | O6   | C25  | 119.5(6)   | O3   | C9   | N2   | 111.03(12) |
| C2   | N1   | C3   | 125.25(13) | O3   | C10  | C11  | 107.97(15) |
| C2   | N1   | C25  | 116.55(14) | C13  | C12  | C7   | 120.13(14) |
| C3   | N1   | C25  | 118.18(14) | C13  | C12  | C17  | 118.96(14) |
| C3   | N2   | C4   | 122.62(13) | C17  | C12  | C7   | 120.87(14) |
| C3   | N2   | C9   | 117.99(12) | C14  | C13  | C12  | 120.53(16) |
| C4   | N2   | C9   | 118.98(12) | C15  | C14  | C13  | 120.07(17) |
| C6   | N3   | S1   | 122.08(10) | C14  | C15  | C16  | 120.04(16) |
| C6   | N3   | C18  | 115.89(11) | C15  | C16  | C17  | 120.28(17) |

**Table 5 Bond Angles for 3s.**

| Atom | Atom | Atom | Angle/°    | Atom | Atom | Atom | Angle/°    |
|------|------|------|------------|------|------|------|------------|
| C18  | N3   | S1   | 120.56(10) | C16  | C17  | C12  | 120.09(16) |
| C4   | C1   | C2   | 119.92(14) | C19  | C18  | N3   | 119.77(13) |
| C8   | C1   | C2   | 119.74(14) | C19  | C18  | C23  | 120.88(14) |
| C8   | C1   | C4   | 120.34(14) | C23  | C18  | N3   | 119.30(13) |
| O1   | C2   | N1   | 120.62(14) | C18  | C19  | C20  | 119.03(15) |
| O1   | C2   | C1   | 123.93(15) | C21  | C20  | C19  | 120.45(16) |
| N1   | C2   | C1   | 115.44(13) | C22  | C21  | C20  | 120.11(15) |
| O2   | C3   | N1   | 120.99(14) | C21  | C22  | C23  | 120.06(16) |
| O2   | C3   | N2   | 122.18(14) | C22  | C23  | C18  | 119.46(15) |
| N2   | C3   | N1   | 116.82(13) | O6   | C25  | N1   | 114.41(19) |
| C1   | C4   | N2   | 119.82(13) | O6   | C26  | C27  | 107.0(3)   |
| C5   | C4   | N2   | 121.35(13) | O6   | C29  | C28  | 95.9(10)   |
| C5   | C4   | C1   | 118.83(13) |      |      |      |            |

**Table 6 Torsion Angles for 3s.**

| A  | B  | C   | D   | Angle/°     | A  | B   | C   | D   | Angle/°     |
|----|----|-----|-----|-------------|----|-----|-----|-----|-------------|
| S1 | N3 | C6  | C5  | 77.63(16)   | C6 | C7  | C12 | C17 | 62.8(2)     |
| S1 | N3 | C6  | C7  | -108.62(14) | C7 | C12 | C13 | C14 | -178.83(14) |
| S1 | N3 | C18 | C19 | 83.48(16)   | C7 | C12 | C17 | C16 | 177.46(14)  |
| S1 | N3 | C18 | C23 | -99.08(15)  | C8 | C1  | C2  | O1  | 4.0(3)      |
| O4 | S1 | N3  | C6  | 146.51(12)  | C8 | C1  | C2  | N1  | -176.31(14) |
| O4 | S1 | N3  | C18 | -47.85(13)  | C8 | C1  | C4  | N2  | 177.20(14)  |
| O5 | S1 | N3  | C6  | 17.17(13)   | C8 | C1  | C4  | C5  | -1.7(2)     |
| O5 | S1 | N3  | C18 | -177.18(11) | C8 | C7  | C12 | C13 | 59.4(2)     |

**Table 6 Torsion Angles for 3s.**

| A  | B   | C   | D   | Angle/°     | A   | B   | C   | D   | Angle/°     |
|----|-----|-----|-----|-------------|-----|-----|-----|-----|-------------|
| N2 | C4  | C5  | C6  | -176.80(13) | C8  | C7  | C12 | C17 | -118.04(17) |
| N3 | C6  | C7  | C8  | -173.51(13) | C9  | O3  | C10 | C11 | -174.31(13) |
| N3 | C6  | C7  | C12 | 5.6(2)      | C9  | N2  | C3  | O2  | -7.4(2)     |
| N3 | C18 | C19 | C20 | 178.04(13)  | C9  | N2  | C3  | N1  | 173.64(13)  |
| N3 | C18 | C23 | C22 | -177.22(14) | C9  | N2  | C4  | C1  | -171.89(13) |
| C1 | C4  | C5  | C6  | 2.1(2)      | C9  | N2  | C4  | C5  | 7.0(2)      |
| C2 | N1  | C3  | O2  | -178.89(15) | C10 | O3  | C9  | N2  | 72.92(16)   |
| C2 | N1  | C3  | N2  | 0.0(2)      | C12 | C7  | C8  | C1  | -178.85(14) |
| C2 | N1  | C25 | O6  | 79.2(2)     | C12 | C13 | C14 | C15 | 1.5(2)      |
| C2 | C1  | C4  | N2  | -3.3(2)     | C13 | C12 | C17 | C16 | 0.0(2)      |
| C2 | C1  | C4  | C5  | 177.80(14)  | C13 | C14 | C15 | C16 | -0.3(3)     |
| C2 | C1  | C8  | C7  | -178.99(14) | C14 | C15 | C16 | C17 | -1.1(3)     |
| C3 | N1  | C2  | O1  | 177.08(16)  | C15 | C16 | C17 | C12 | 1.2(3)      |
| C3 | N1  | C2  | C1  | -2.6(2)     | C17 | C12 | C13 | C14 | -1.3(2)     |
| C3 | N1  | C25 | O6  | -102.3(2)   | C18 | N3  | C6  | C5  | -88.64(16)  |
| C3 | N2  | C4  | C1  | 0.6(2)      | C18 | N3  | C6  | C7  | 85.11(16)   |
| C3 | N2  | C4  | C5  | 179.42(14)  | C18 | C19 | C20 | C21 | -0.7(2)     |
| C3 | N2  | C9  | O3  | -114.72(14) | C19 | C18 | C23 | C22 | 0.2(2)      |
| C4 | N2  | C3  | O2  | -179.96(15) | C19 | C20 | C21 | C22 | -0.1(3)     |
| C4 | N2  | C3  | N1  | 1.1(2)      | C20 | C21 | C22 | C23 | 0.9(3)      |
| C4 | N2  | C9  | O3  | 58.09(17)   | C21 | C22 | C23 | C18 | -1.0(2)     |
| C4 | C1  | C2  | O1  | -175.49(16) | C23 | C18 | C19 | C20 | 0.6(2)      |
| C4 | C1  | C2  | N1  | 4.2(2)      | C24 | S1  | N3  | C6  | -98.80(13)  |
| C4 | C1  | C8  | C7  | 0.5(2)      | C24 | S1  | N3  | C18 | 66.85(13)   |
| C4 | C5  | C6  | N3  | 172.24(13)  | C25 | O6  | C26 | C27 | 140.2(3)    |
| C4 | C5  | C6  | C7  | -1.3(2)     | C25 | O6  | C29 | C28 | 114.1(8)    |

**Table 6 Torsion Angles for 3s.**

| A  | B  | C   | D   | Angle/°     | A     | B     | C  | D | Angle/°     |
|----|----|-----|-----|-------------|-------|-------|----|---|-------------|
| C5 | C6 | C7  | C8  | 0.1(2)      | C25N1 | C2    | O1 |   | -4.6(2)     |
| C5 | C6 | C7  | C12 | 179.23(14)  | C25N1 | C2    | C1 |   | 175.67(16)  |
| C6 | N3 | C18 | C19 | -110.02(15) | C25N1 | C3    | O2 |   | 2.8(2)      |
| C6 | N3 | C18 | C23 | 67.41(18)   | C25N1 | C3    | N2 |   | -178.24(16) |
| C6 | C7 | C8  | C1  | 0.3(2)      | C26O6 | C25N1 |    |   | 91.8(3)     |
| C6 | C7 | C12 | C13 | -119.69(16) | C29O6 | C25N1 |    |   | 45.9(8)     |

**Table 7 Hydrogen Atom Coordinates ( $\text{\AA} \times 10^4$ ) and Isotropic Displacement Parameters ( $\text{\AA}^2 \times 10^3$ ) for 3s.**

| Atom | x        | y        | z       | U(eq) |
|------|----------|----------|---------|-------|
| H5   | 3388.14  | 2834.1   | 1984    | 25    |
| H8   | 1679.63  | 3719.07  | 3829.52 | 28    |
| H9A  | 4819     | 5585.17  | 2019.96 | 29    |
| H9B  | 4722.19  | 4042.84  | 2089.21 | 29    |
| H10A | 3732.54  | 6691.71  | 982.98  | 41    |
| H10B | 2994.74  | 6494.66  | 1515.44 | 41    |
| H11A | 2666.41  | 5457.48  | -3.36   | 67    |
| H11B | 2181.13  | 6774.06  | 187.79  | 67    |
| H11C | 1914.15  | 5421.13  | 521.43  | 67    |
| H13  | -60.84   | 2890.87  | 2854.06 | 31    |
| H14  | -1288.11 | 1525.99  | 3030.63 | 39    |
| H15  | -944.22  | -608.07  | 3429.89 | 45    |
| H16  | 625.61   | -1396.52 | 3645.07 | 43    |
| H17  | 1848.02  | -69.46   | 3423.4  | 33    |
| H19  | 250.94   | 278.93   | 1538.32 | 30    |

**Table 7 Hydrogen Atom Coordinates ( $\text{\AA}\times 10^4$ ) and Isotropic Displacement Parameters ( $\text{\AA}^2\times 10^3$ ) for 3s.**

| <b>Atom</b> | <b>x</b> | <b>y</b> | <b>z</b> | <b>U(eq)</b> |
|-------------|----------|----------|----------|--------------|
| H20         | -977.6   | 777.27   | 441.31   | 37           |
| H21         | -685.78  | 2195.65  | -488.55  | 40           |
| H22         | 830.48   | 3133.03  | -329.3   | 40           |
| H23         | 2075.25  | 2604.81  | 747.51   | 33           |
| H24A        | 3771.38  | 707.83   | 1413.06  | 57           |
| H24B        | 2921.81  | 27.77    | 781.96   | 57           |
| H24C        | 3755.78  | -836.91  | 1314.7   | 57           |
| H25A        | 4090(17) | 8240(20) | 3821(14) | 54(7)        |
| H25B        | 3141(17) | 7890(20) | 4221(13) | 52(6)        |
| H26A        | 5487.41  | 8173.54  | 4408.7   | 69           |
| H26B        | 5765.59  | 6830.53  | 4867.95  | 69           |
| H27A        | 5560.81  | 9269.04  | 5561.68  | 74           |
| H27B        | 6556.6   | 8513.95  | 5645.57  | 74           |
| H27C        | 5756.15  | 7936     | 6034.3   | 74           |
| H28A        | 5681.53  | 8693.37  | 4884.74  | 155          |
| H28B        | 6561.76  | 7701.42  | 5146.74  | 155          |
| H28C        | 5961.24  | 8135.29  | 5746.19  | 155          |
| H29A        | 5286.76  | 6367.26  | 4456.58  | 110          |
| H29B        | 5280.1   | 6096.08  | 5347.57  | 110          |

**Table 8 Atomic Occupancy for 3s.**

| <b>Atom</b> | <b>Occupancy</b> | <b>Atom</b> | <b>Occupancy</b> | <b>Atom</b> | <b>Occupancy</b> |
|-------------|------------------|-------------|------------------|-------------|------------------|
| C26         | 0.711(7)         | H26A        | 0.711(7)         | H26B        | 0.711(7)         |
| C27         | 0.711(7)         | H27A        | 0.711(7)         | H27B        | 0.711(7)         |

**Table 8 Atomic Occupancy for 3s.**

| <b>Atom</b> | <b><i>Occupancy</i></b> | <b>Atom</b> | <b><i>Occupancy</i></b> | <b>Atom</b> | <b><i>Occupancy</i></b> |
|-------------|-------------------------|-------------|-------------------------|-------------|-------------------------|
| H27C        | 0.711(7)                | C28         | 0.289(7)                | H28A        | 0.289(7)                |
| H28B        | 0.289(7)                | H28C        | 0.289(7)                | C29         | 0.289(7)                |
| H29A        | 0.289(7)                | H29B        | 0.289(7)                |             |                         |

## 7. NMR Spectra for New Compounds

<sup>1</sup>H NMR (400 MHz, CDCl<sub>3</sub>) Spectra of **3a**

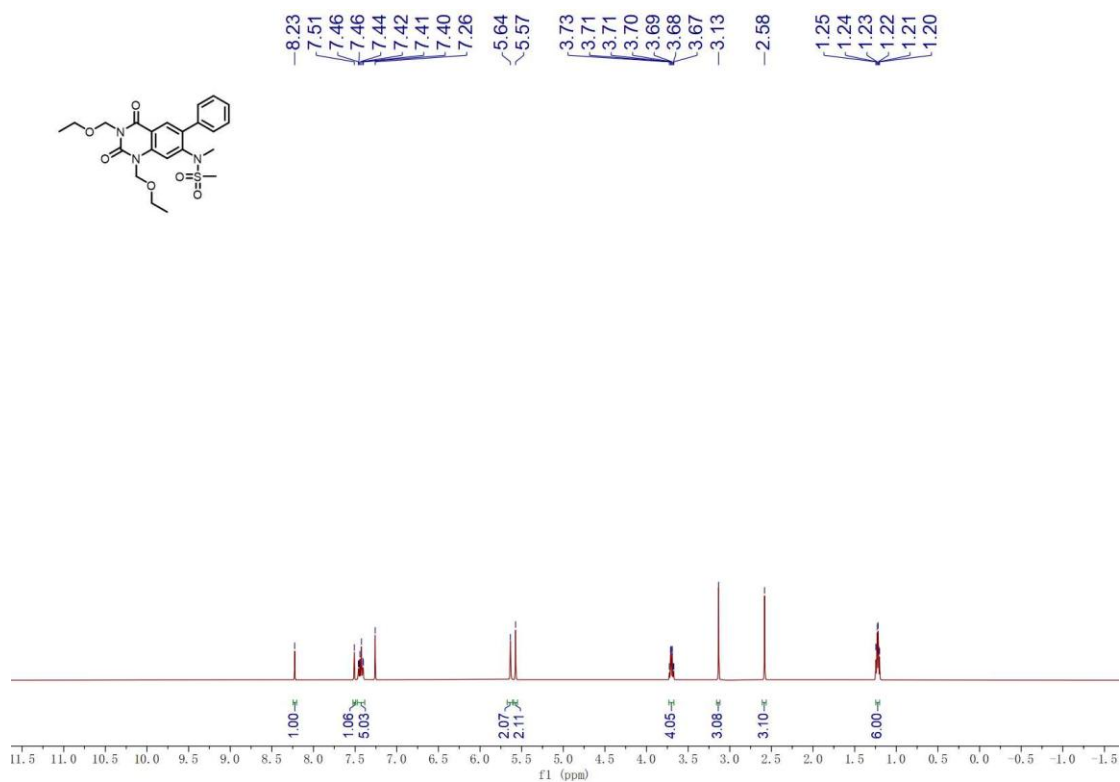

<sup>13</sup>C NMR (101 MHz, CDCl<sub>3</sub>) Spectra of **3a**

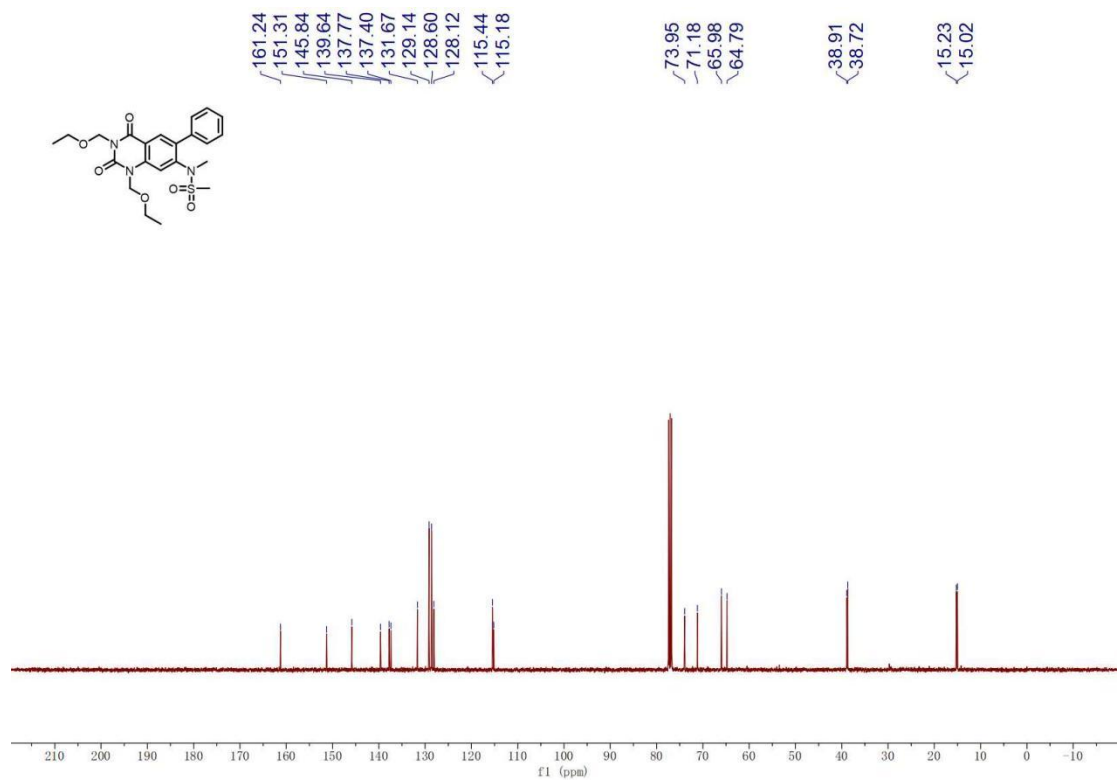

<sup>1</sup>H NMR (400 MHz, CDCl<sub>3</sub>) Spectra of **3b**

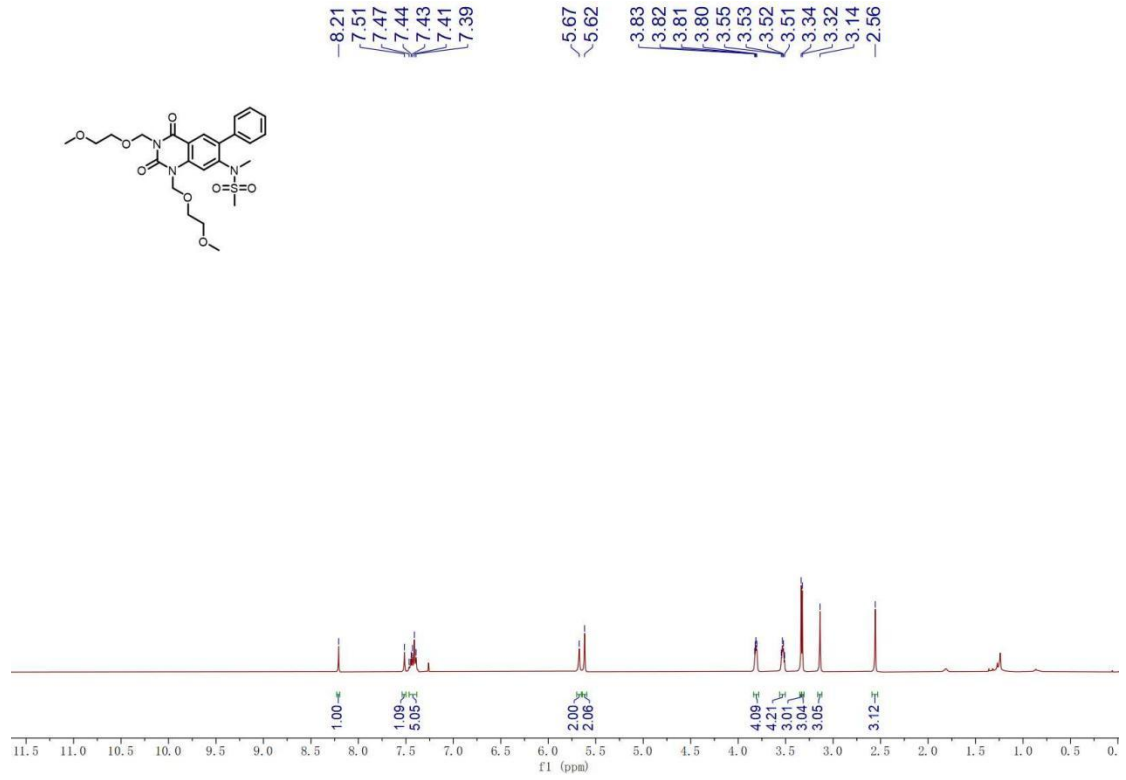

<sup>13</sup>C NMR (101 MHz, CDCl<sub>3</sub>) Spectra of **3b**

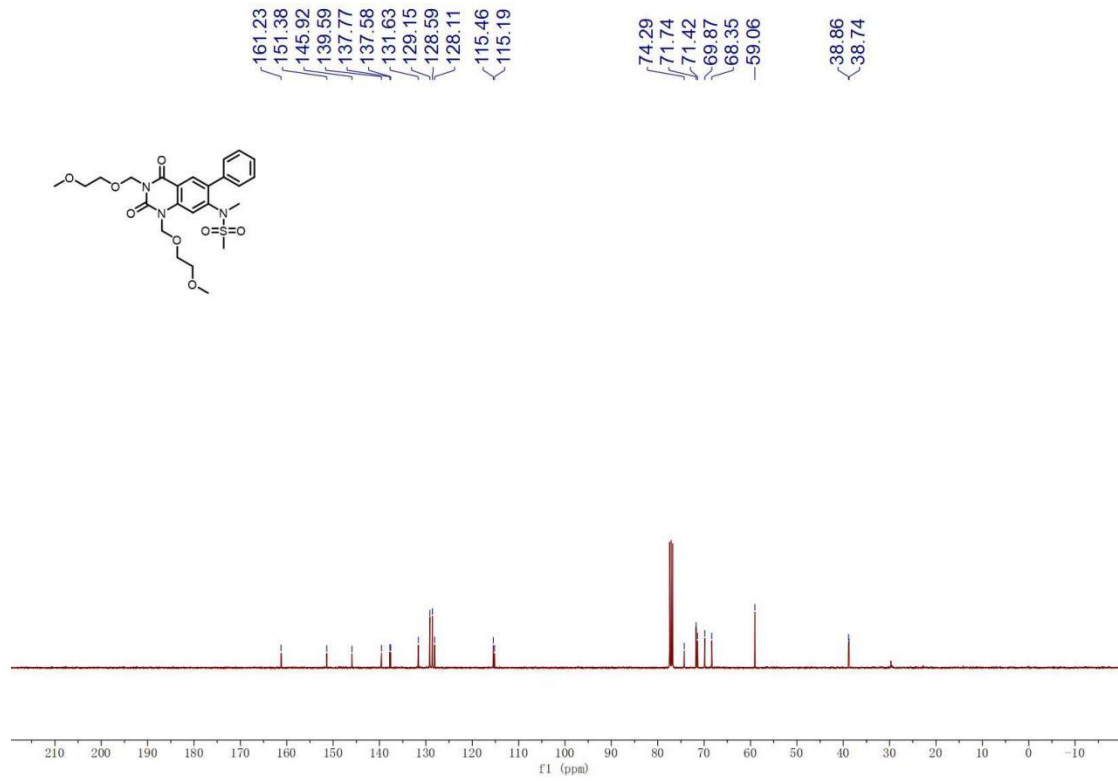

<sup>1</sup>H NMR (400 MHz, CDCl<sub>3</sub>) Spectra of **3c**

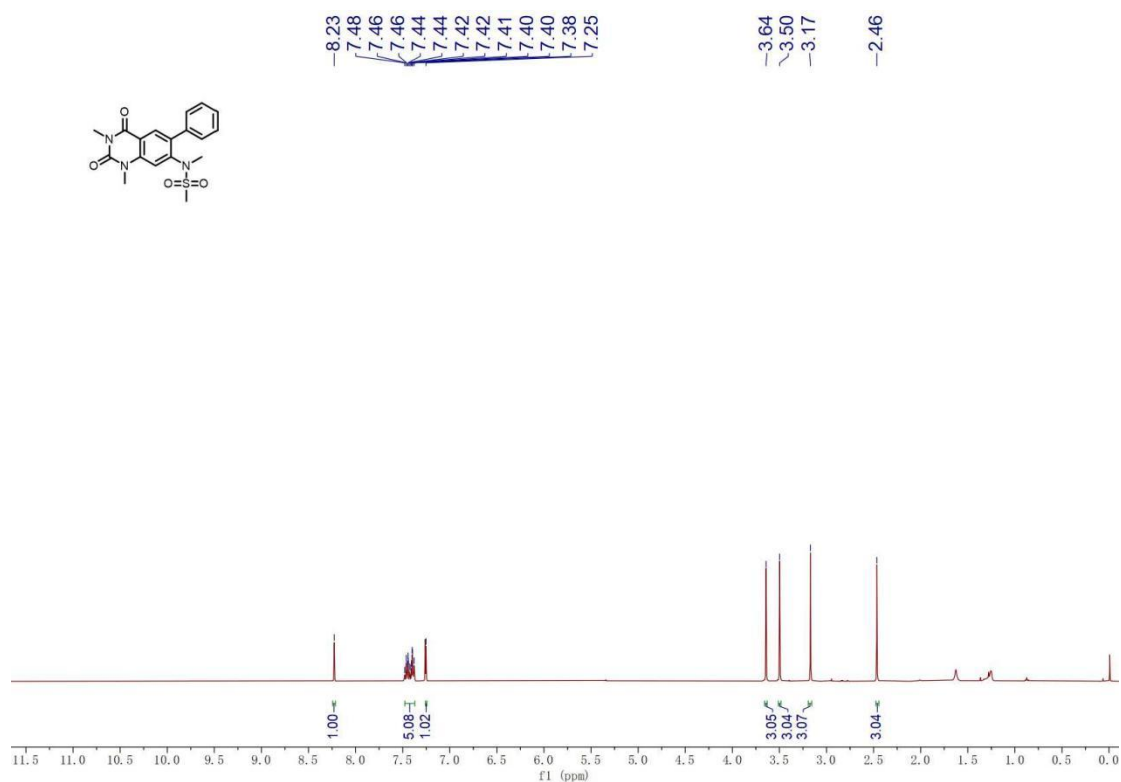

<sup>13</sup>C NMR (101 MHz, CDCl<sub>3</sub>) Spectra of **3c**

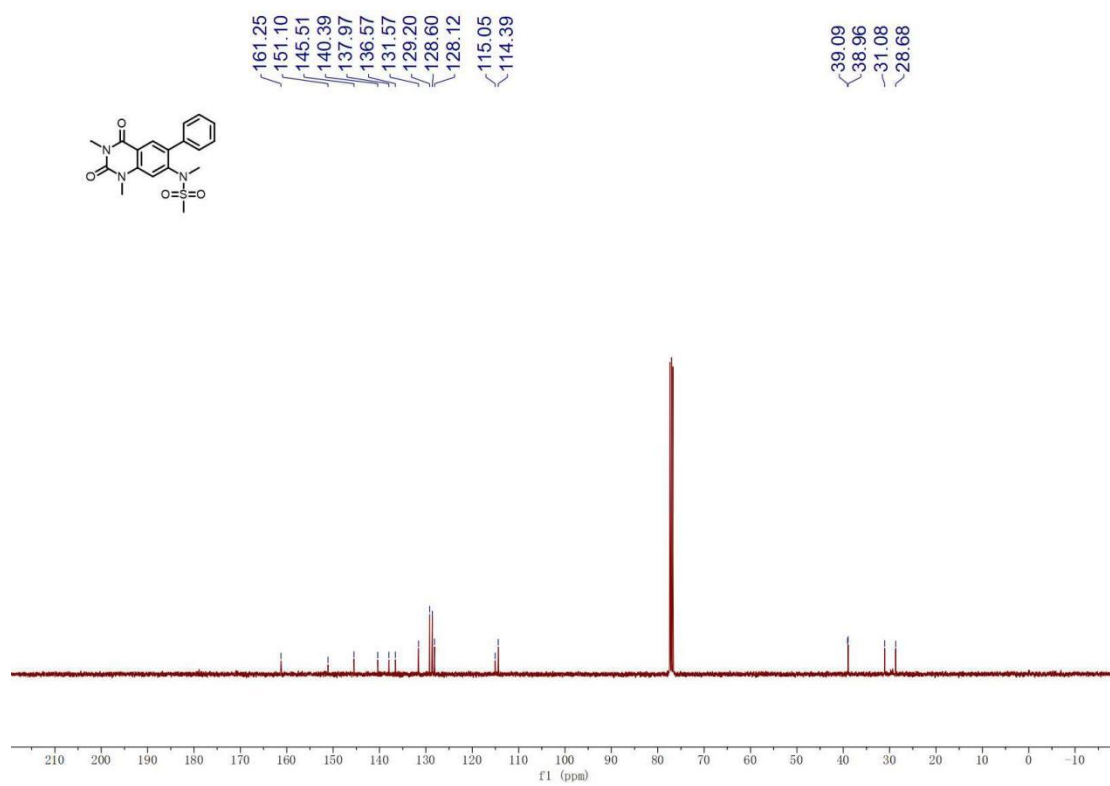

<sup>1</sup>H NMR (400 MHz, CDCl<sub>3</sub>) Spectra of **3d**

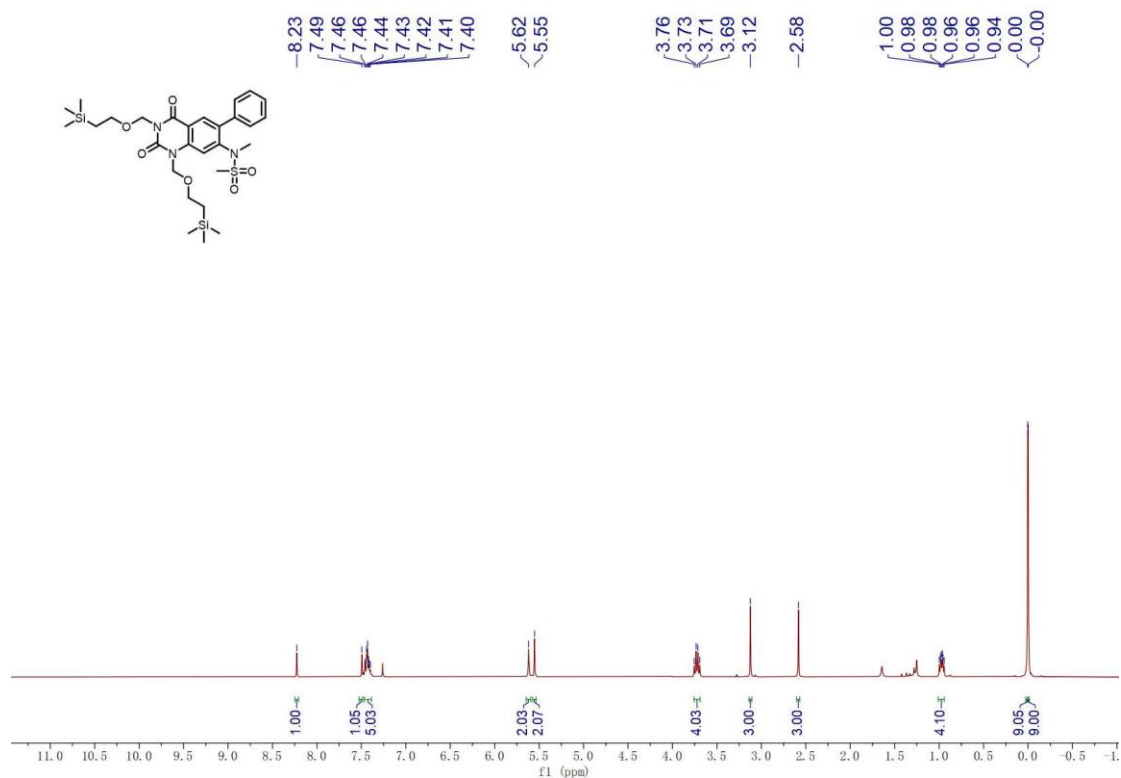

<sup>13</sup>C NMR (101 MHz, CDCl<sub>3</sub>) Spectra of **3d**

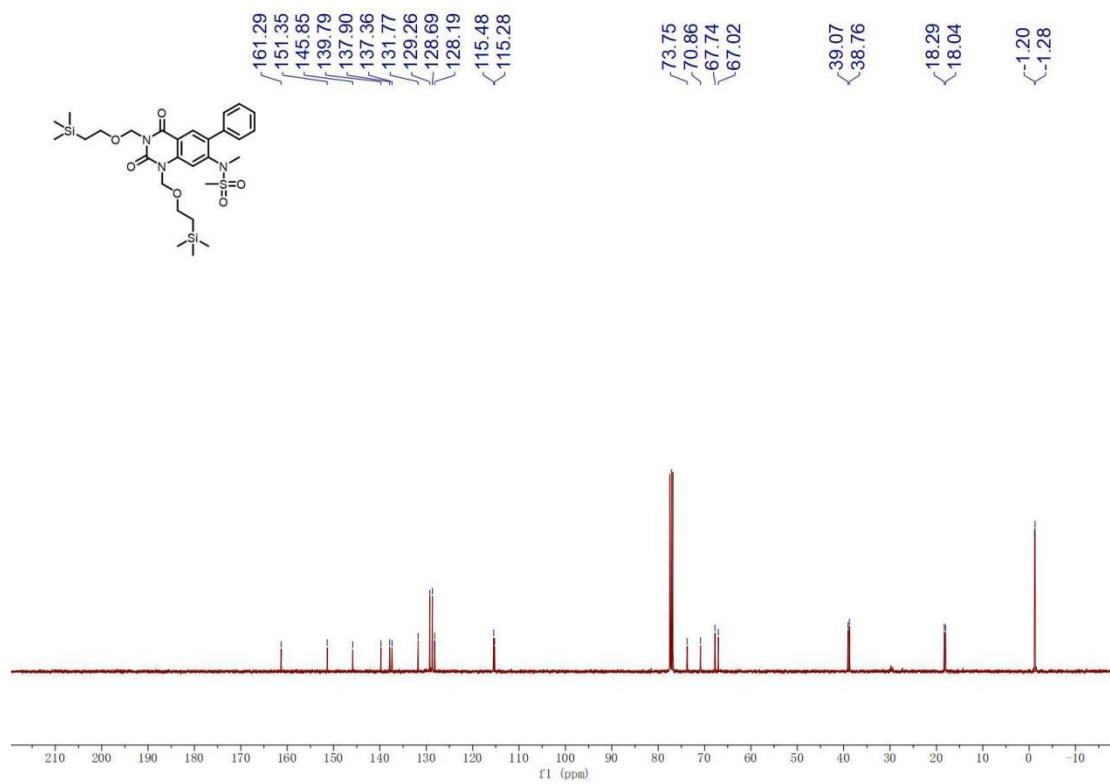

<sup>1</sup>H NMR (400 MHz, CDCl<sub>3</sub>) Spectra of **3e**

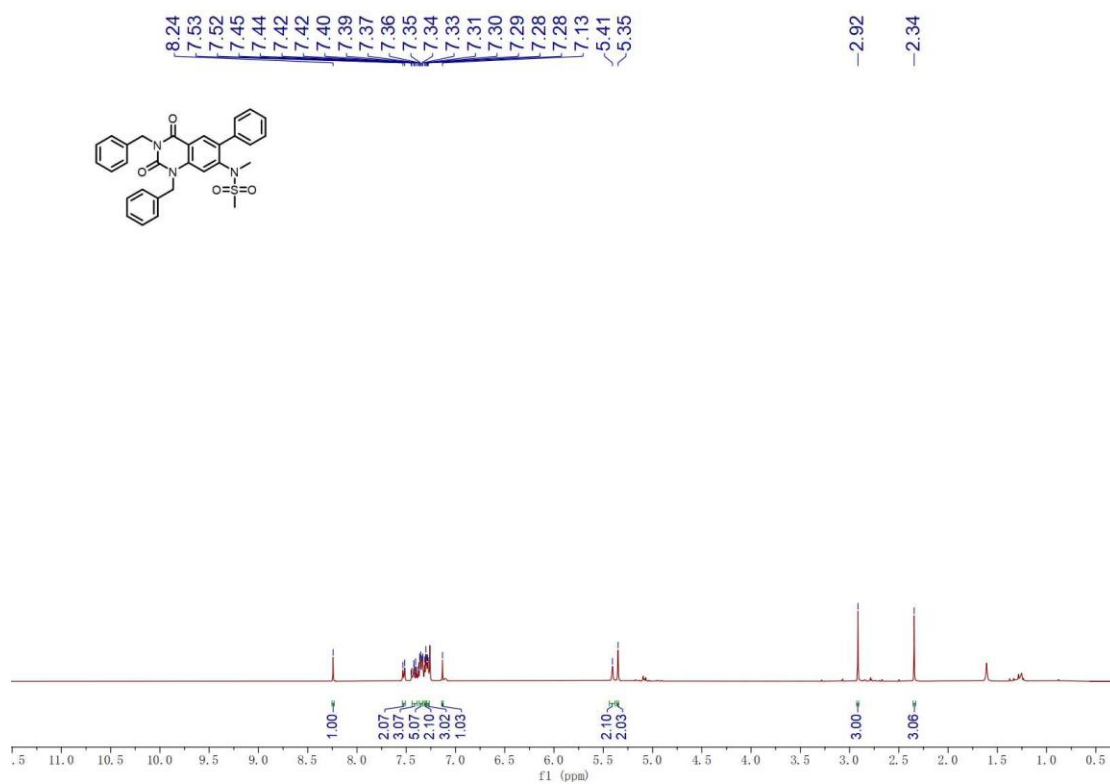

<sup>13</sup>C NMR (101 MHz, CDCl<sub>3</sub>) Spectra of **3e**

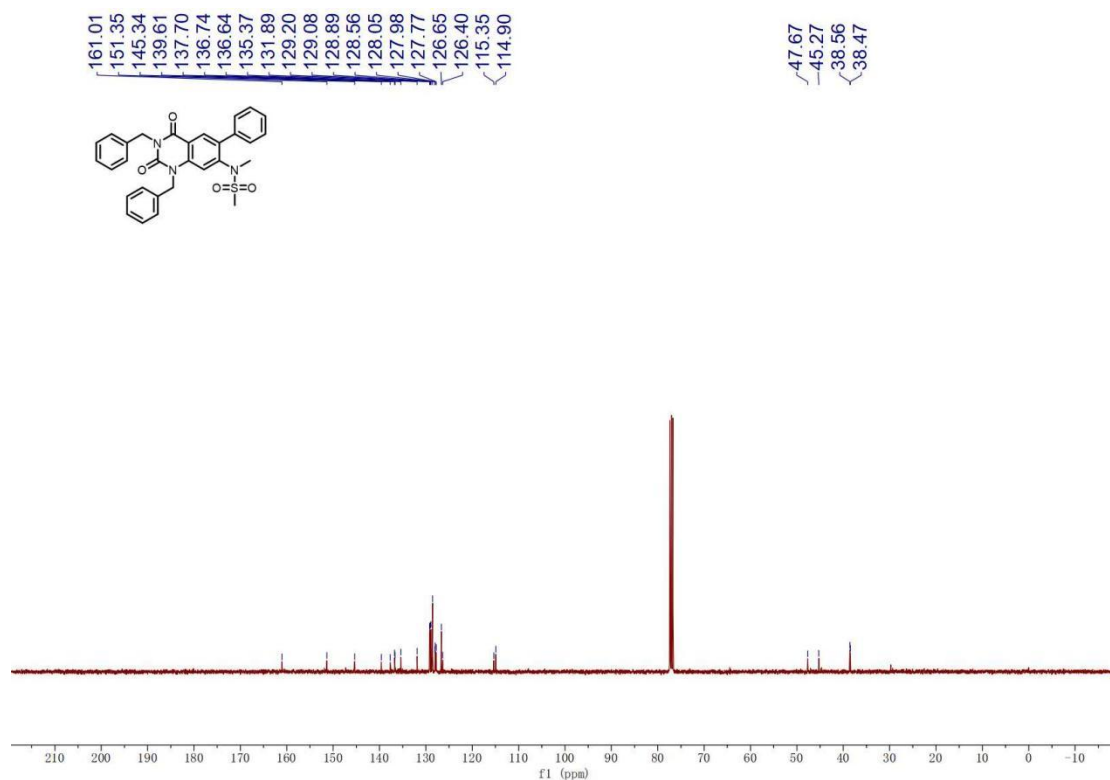

<sup>1</sup>H NMR (400 MHz, CDCl<sub>3</sub>) Spectra of **3f**

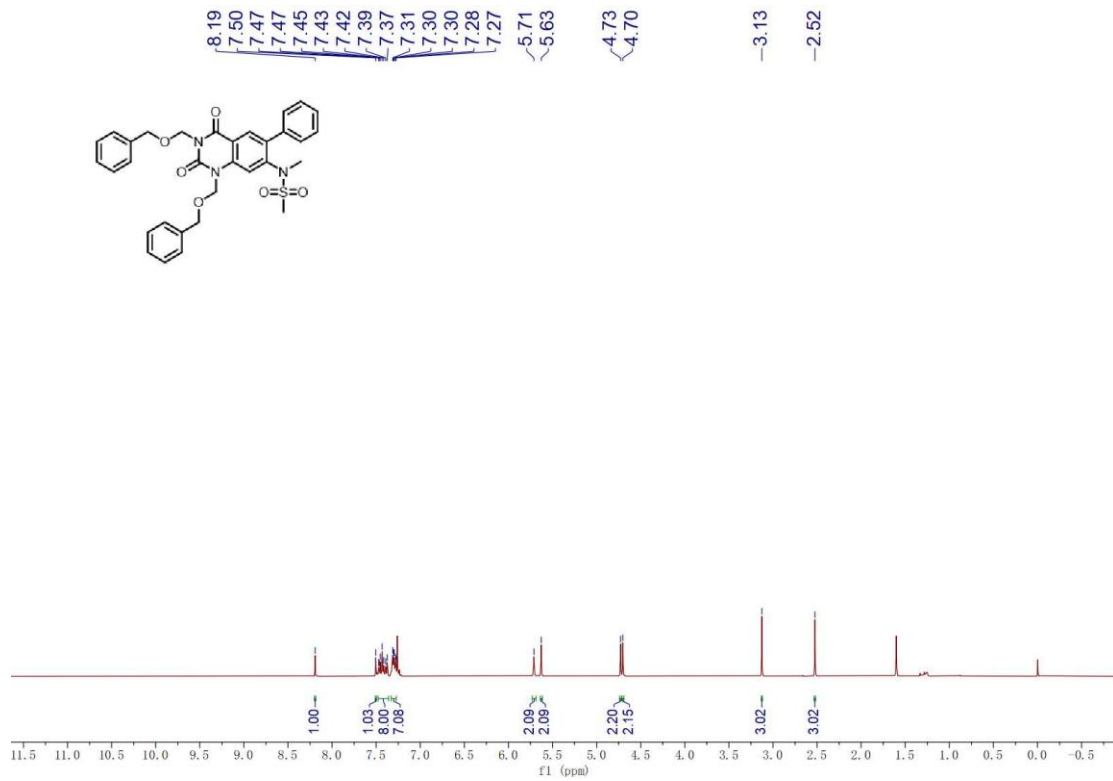

<sup>13</sup>C NMR (101 MHz, CDCl<sub>3</sub>) Spectra of **3f**

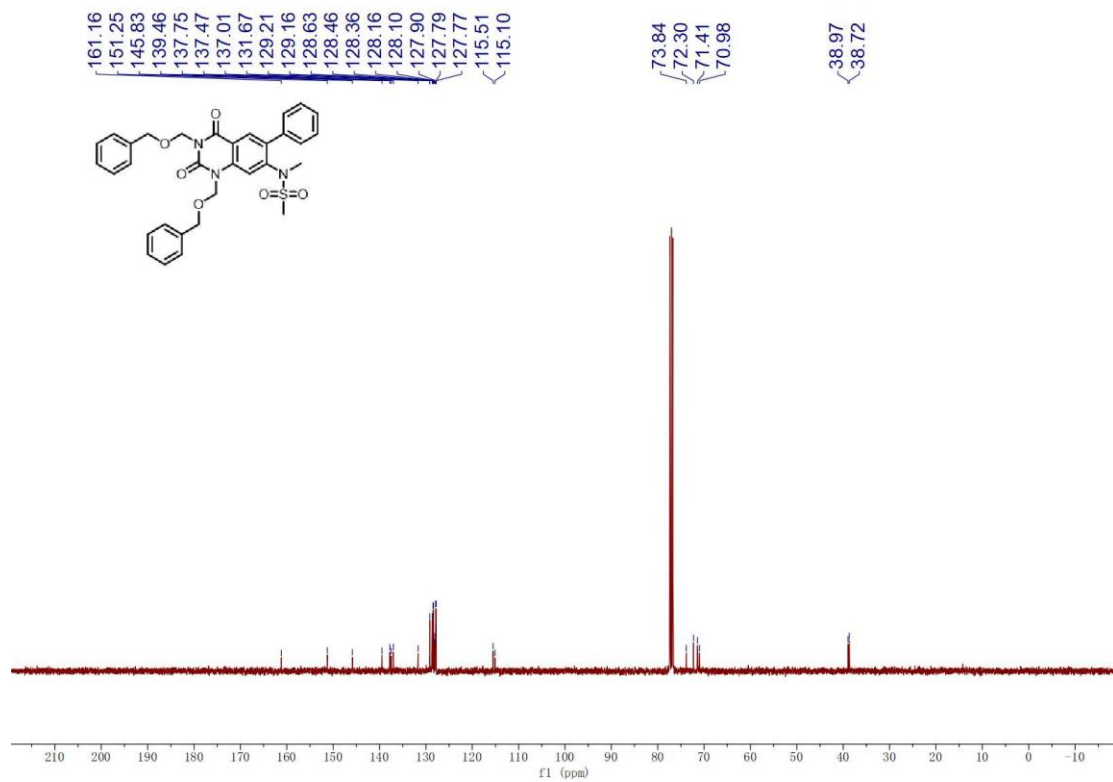

<sup>1</sup>H NMR (400 MHz, CDCl<sub>3</sub>) Spectra of **3g**

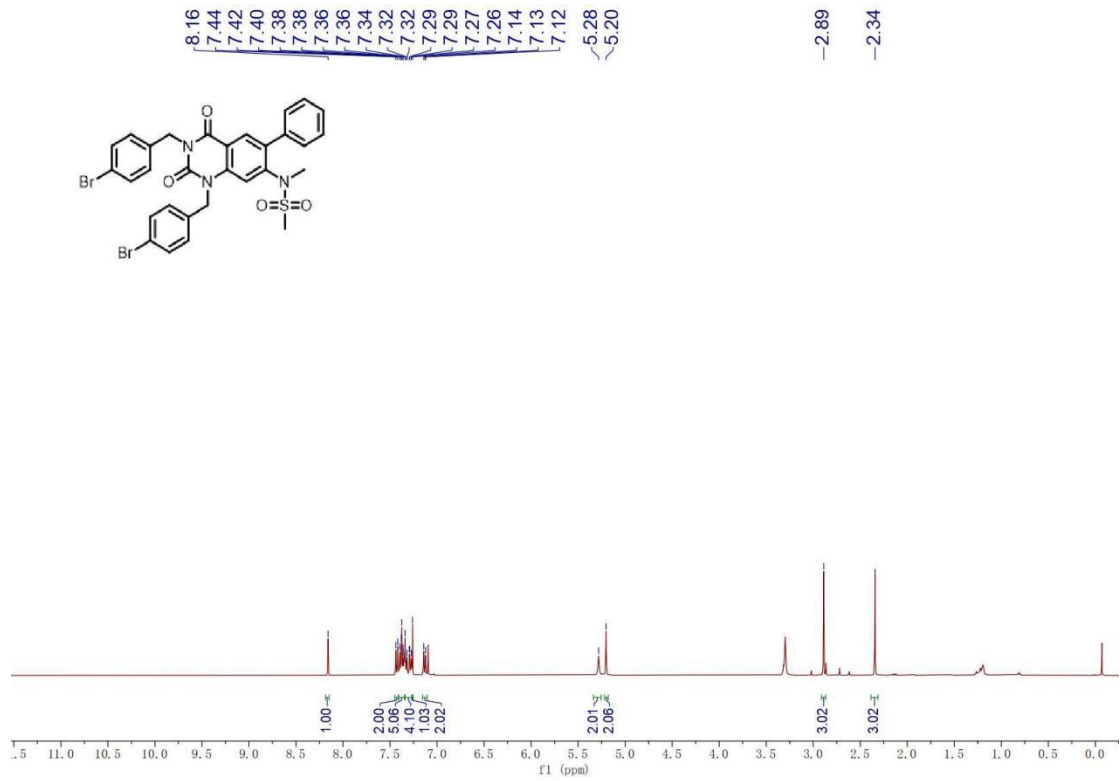

<sup>13</sup>C NMR (101 MHz, CDCl<sub>3</sub>) Spectra of **3g**

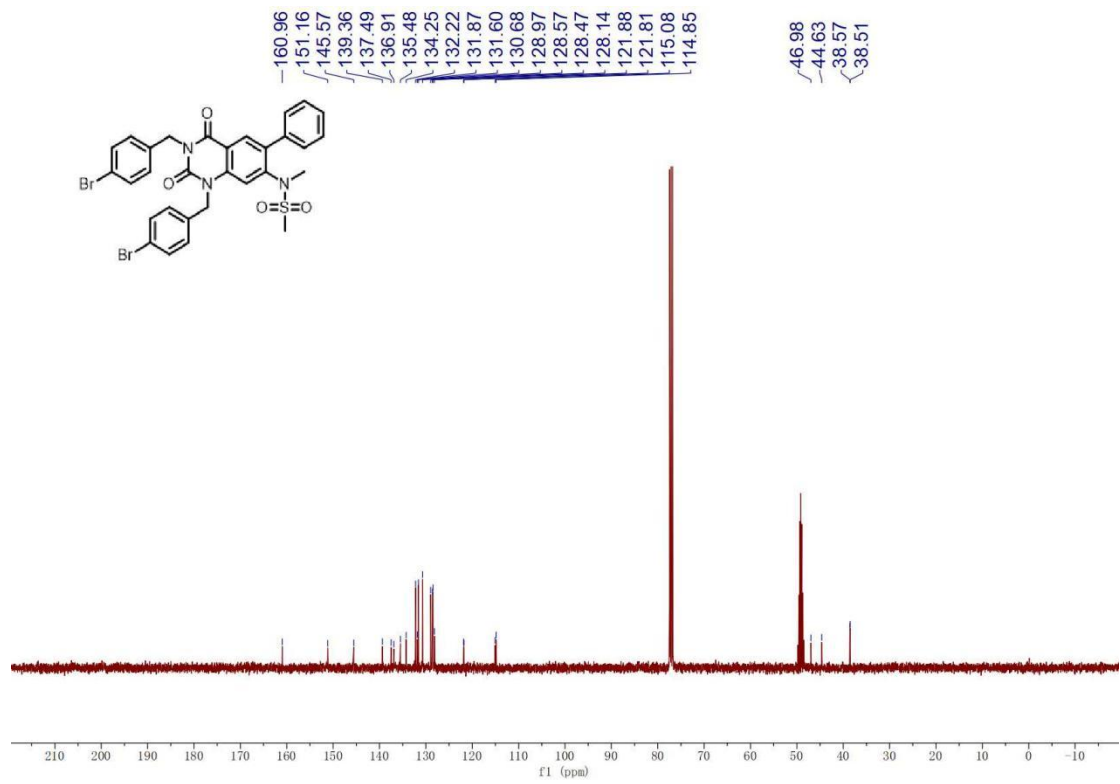

<sup>1</sup>H NMR (400 MHz, CDCl<sub>3</sub>) Spectra of **3h**

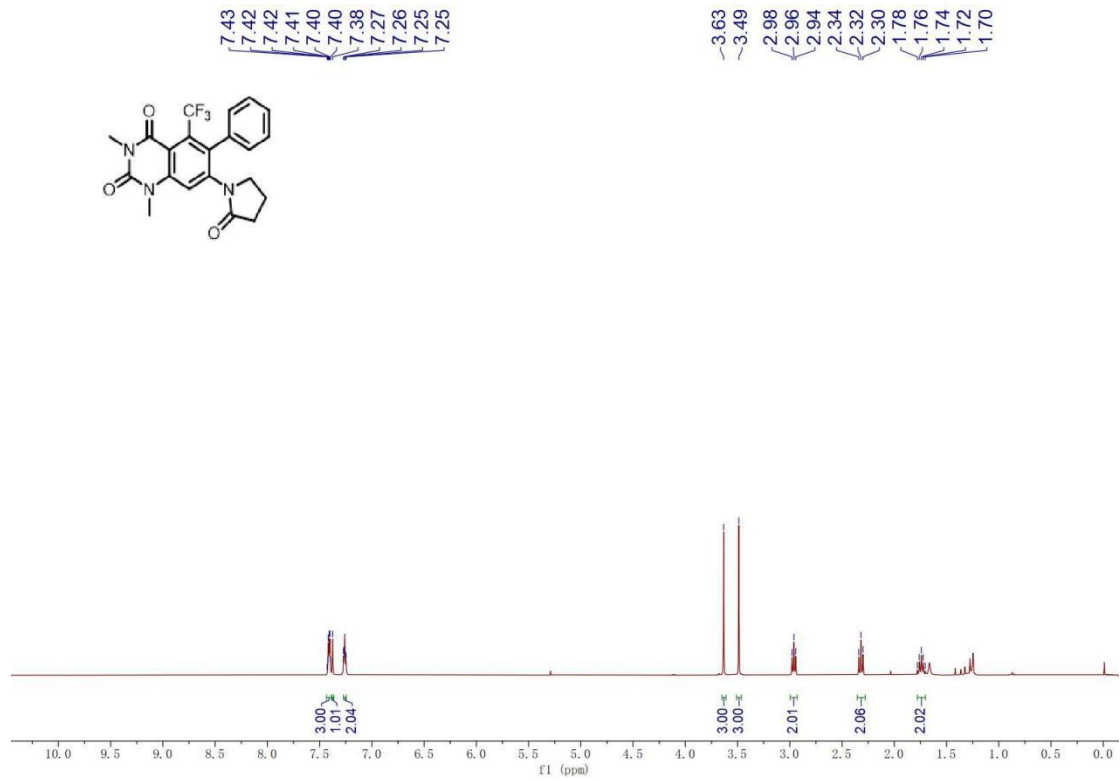

<sup>13</sup>C NMR (101 MHz, CDCl<sub>3</sub>) Spectra of **3h**

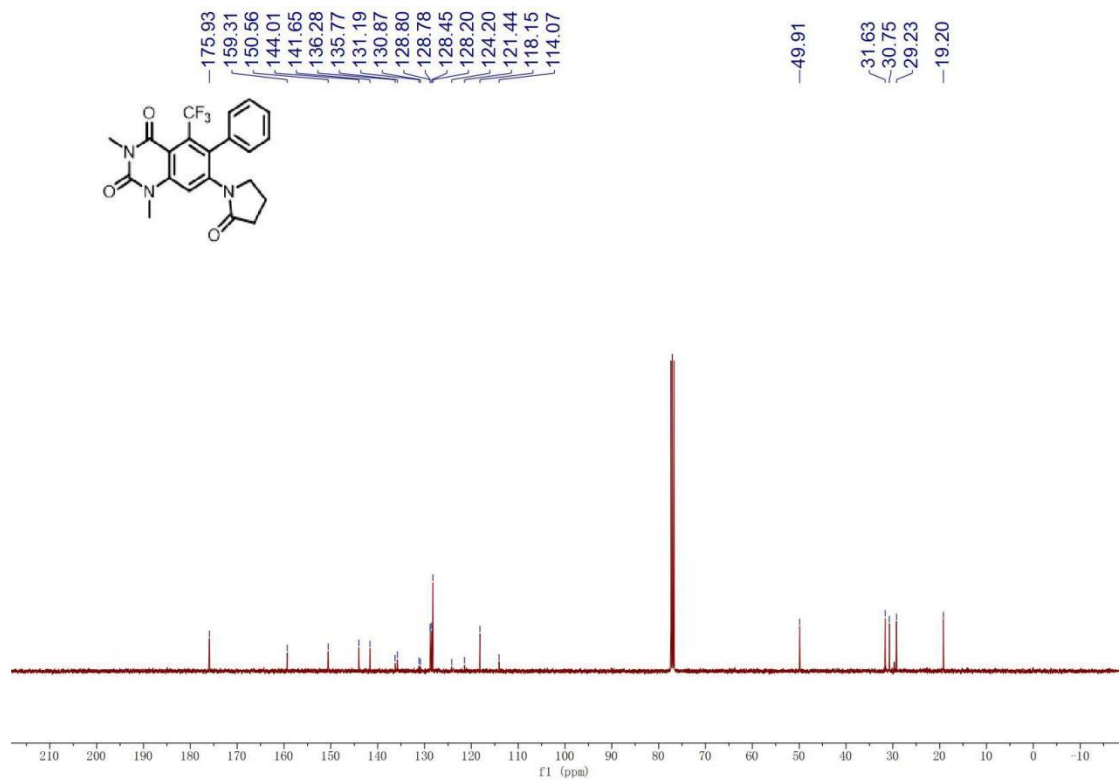

<sup>19</sup>F NMR (376 MHz, CDCl<sub>3</sub>) Spectra of **3h**

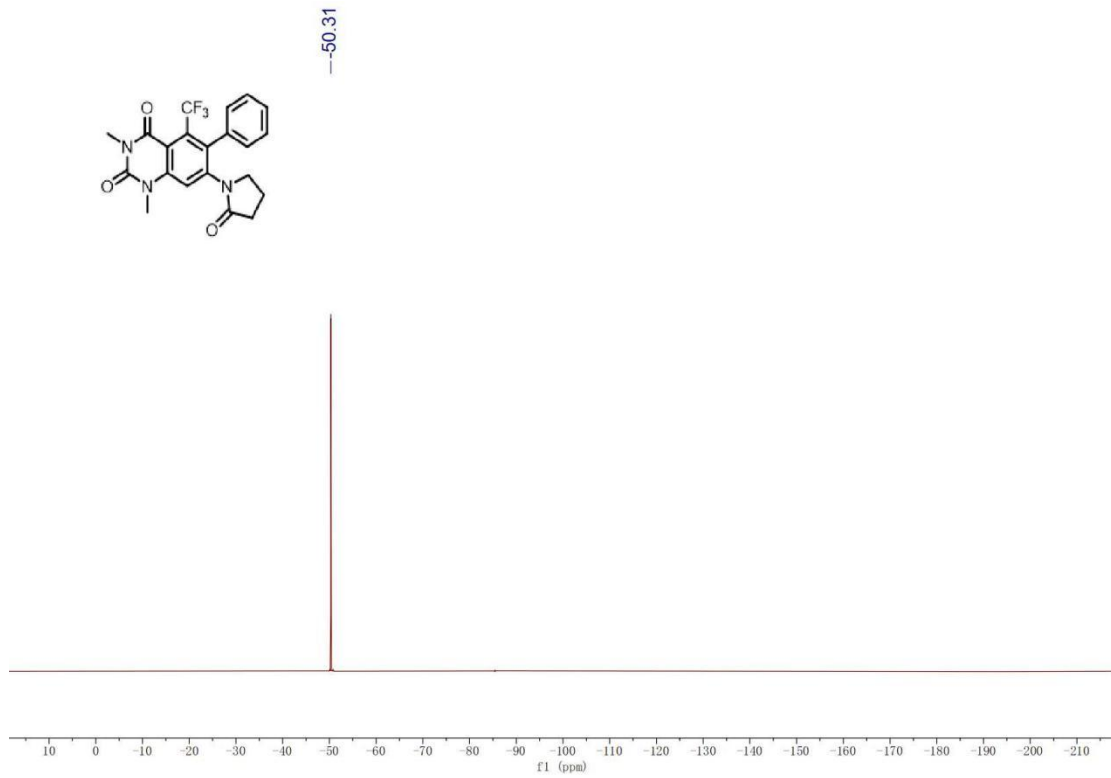

<sup>1</sup>H NMR (400 MHz, CDCl<sub>3</sub>) Spectra of **3i**

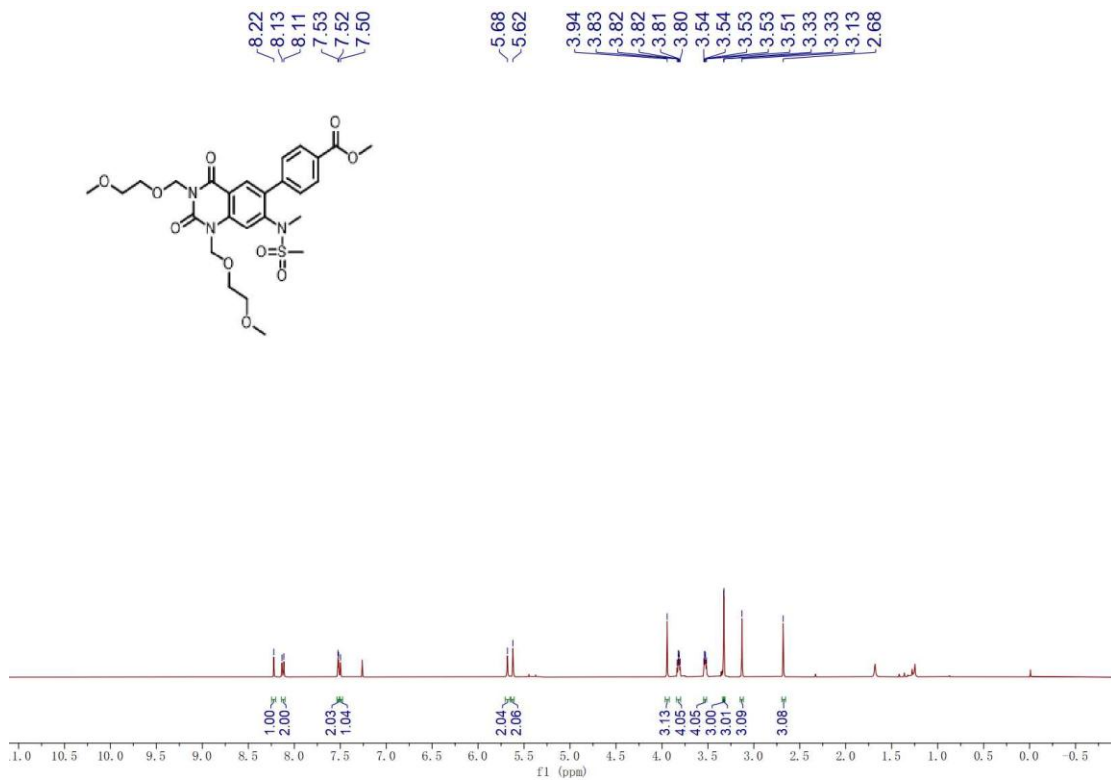

<sup>13</sup>C NMR (101 MHz, CDCl<sub>3</sub>) Spectra of **3i**

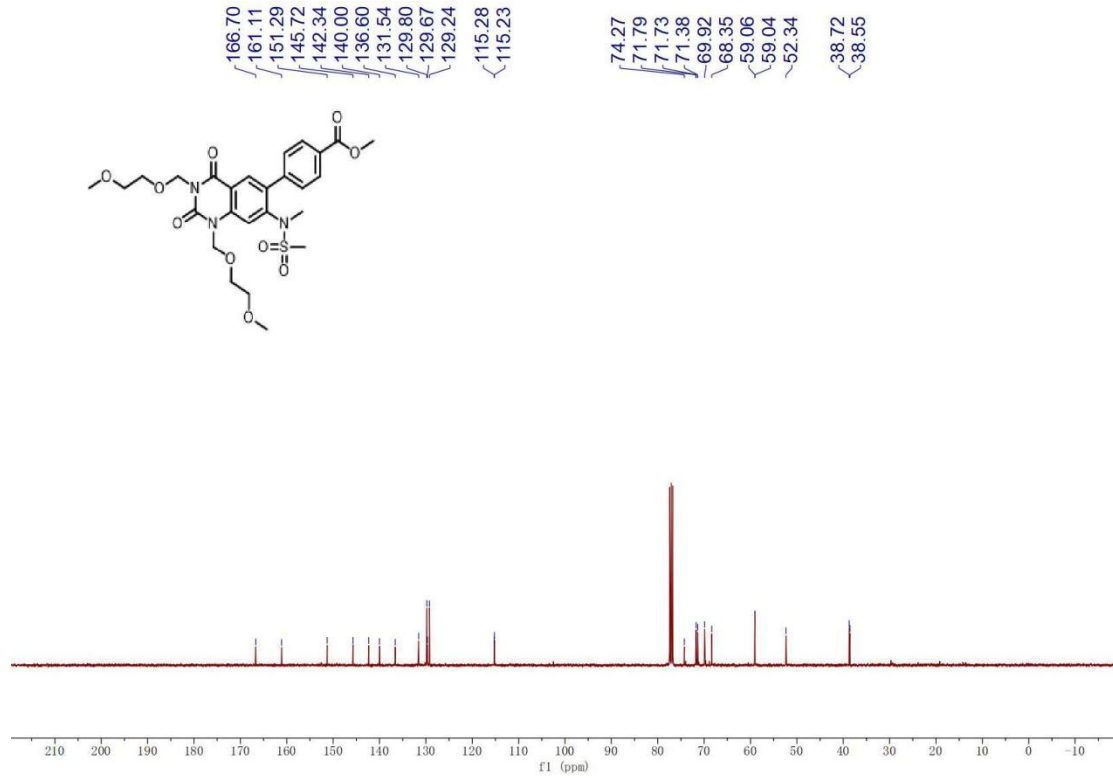

<sup>1</sup>H NMR (400 MHz, CDCl<sub>3</sub>) Spectra of **3j**

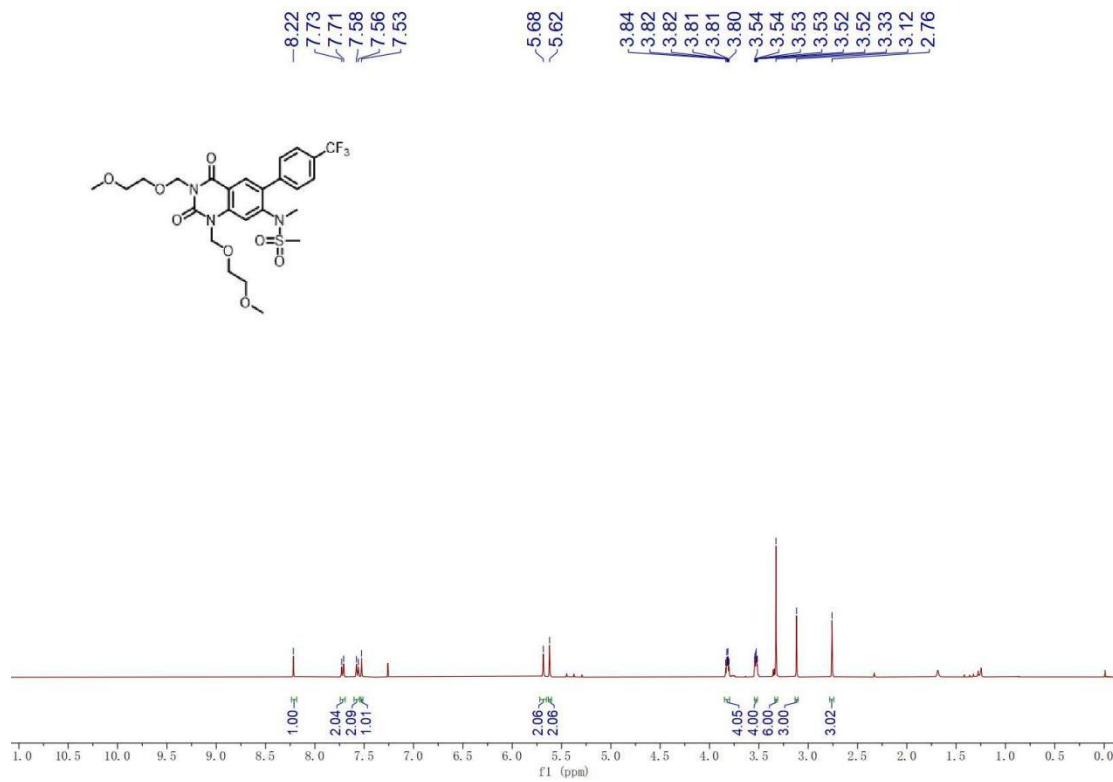

<sup>13</sup>C NMR (101 MHz, CDCl<sub>3</sub>) Spectra of **3j**

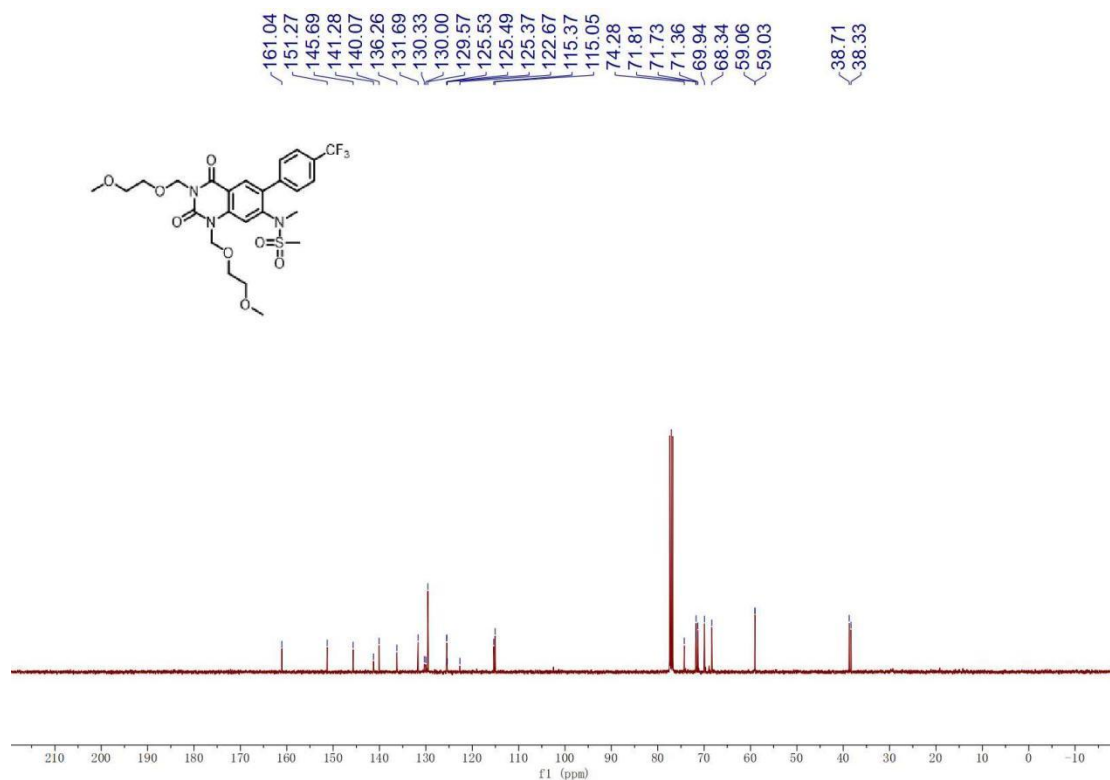

<sup>19</sup>F NMR (376 MHz, CDCl<sub>3</sub>) Spectra of **3j**

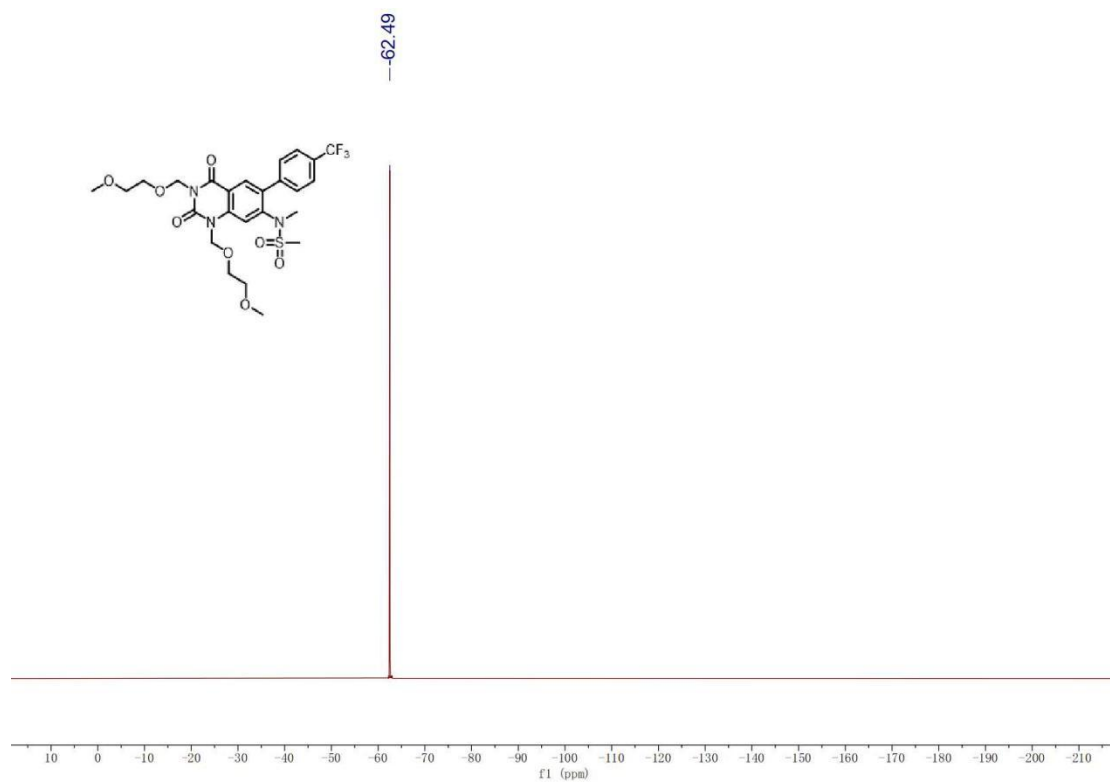

<sup>1</sup>H NMR (400 MHz, CDCl<sub>3</sub>) Spectra of **3k**

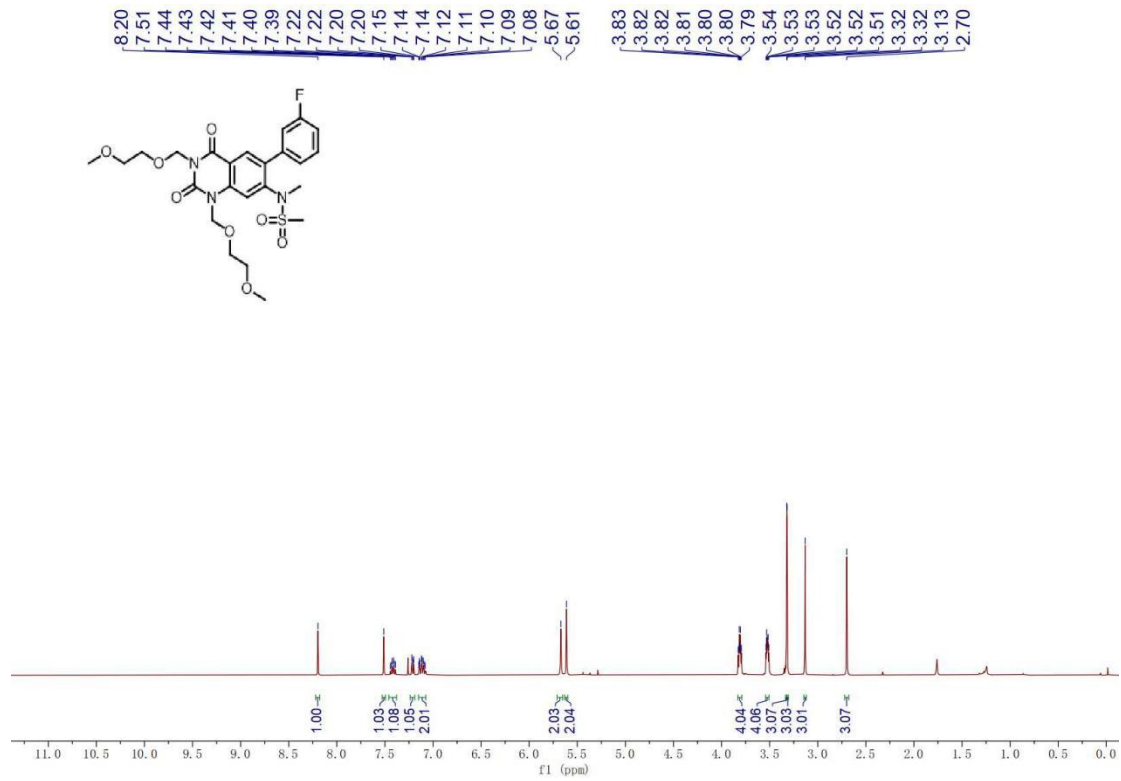

<sup>13</sup>C NMR (101 MHz, CDCl<sub>3</sub>) Spectra of **3k**

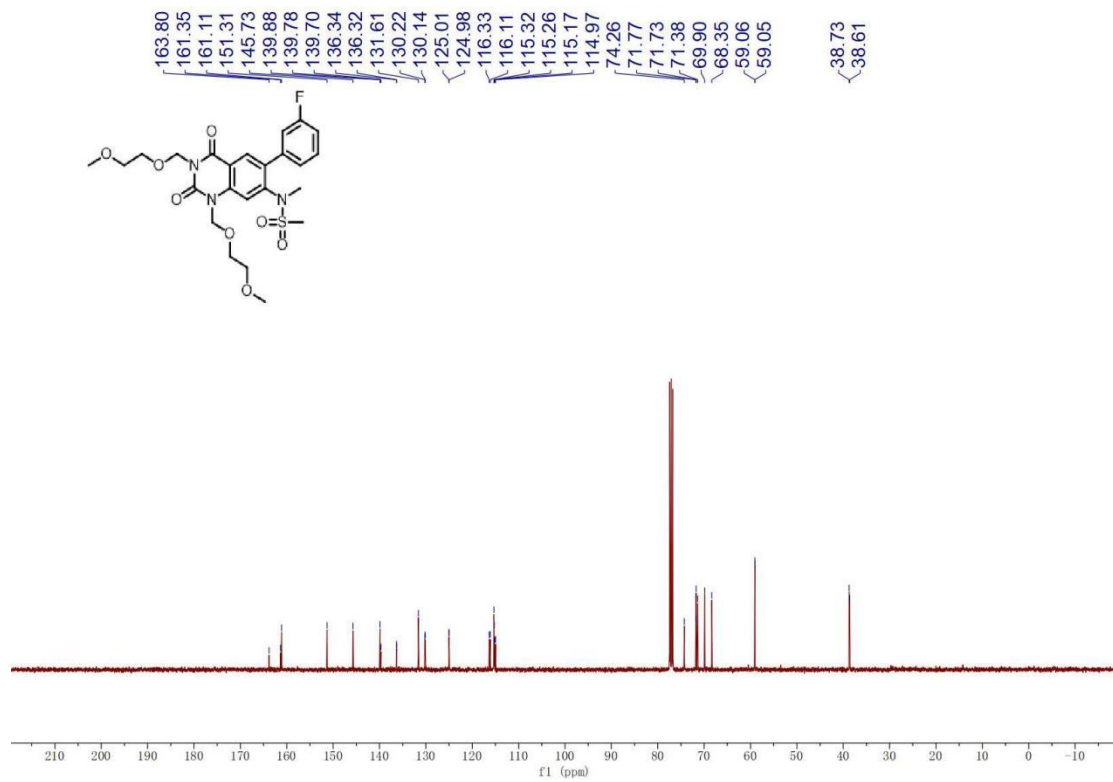

<sup>19</sup>F NMR (376 MHz, CDCl<sub>3</sub>) Spectra of **3k**

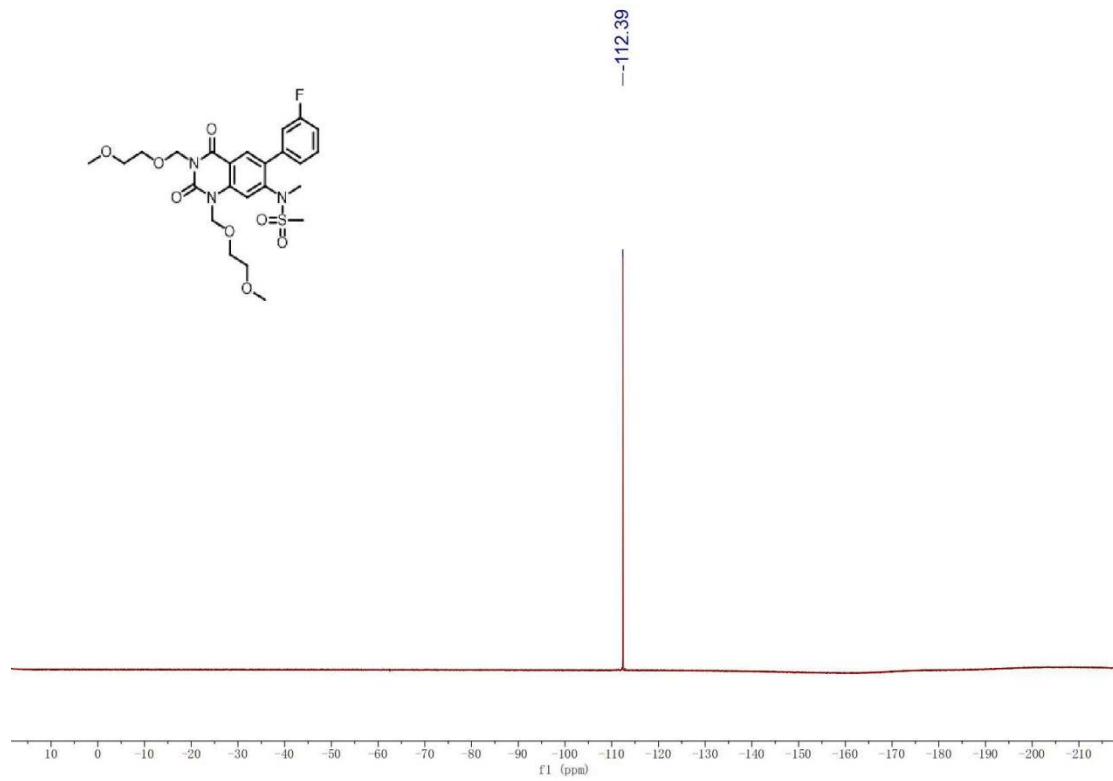

<sup>1</sup>H NMR (400 MHz, CDCl<sub>3</sub>) Spectra of **3l**

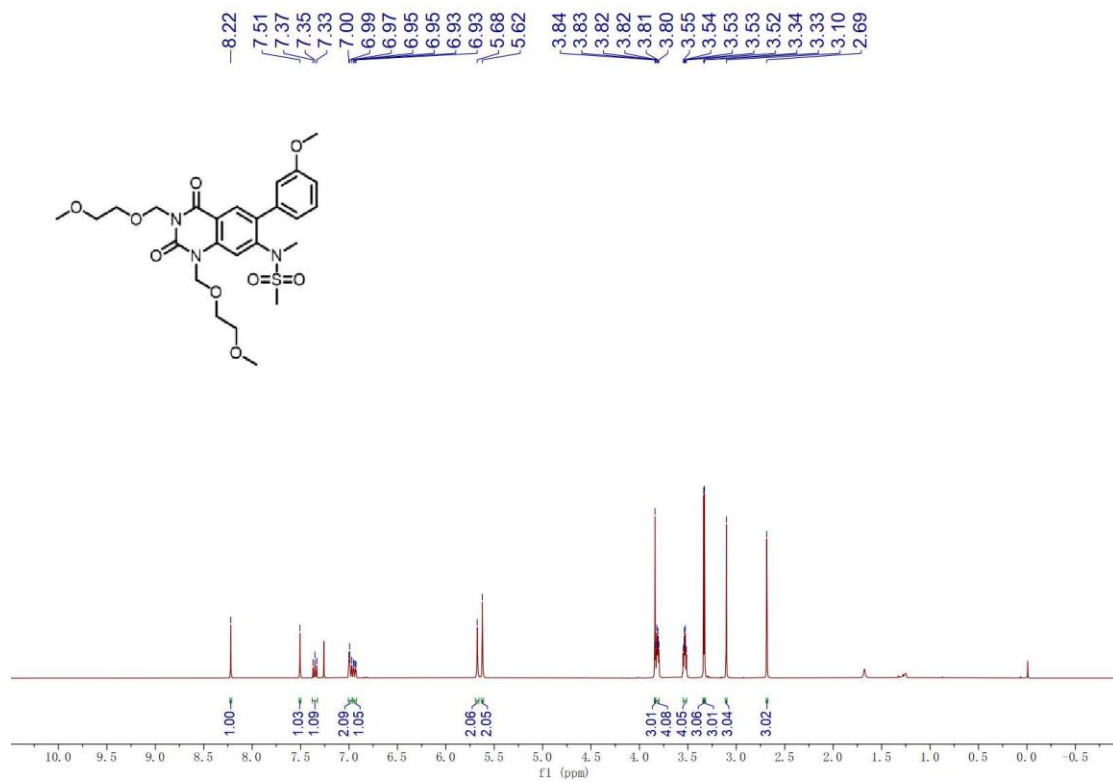

<sup>13</sup>C NMR (101 MHz, CDCl<sub>3</sub>) Spectra of **3l**

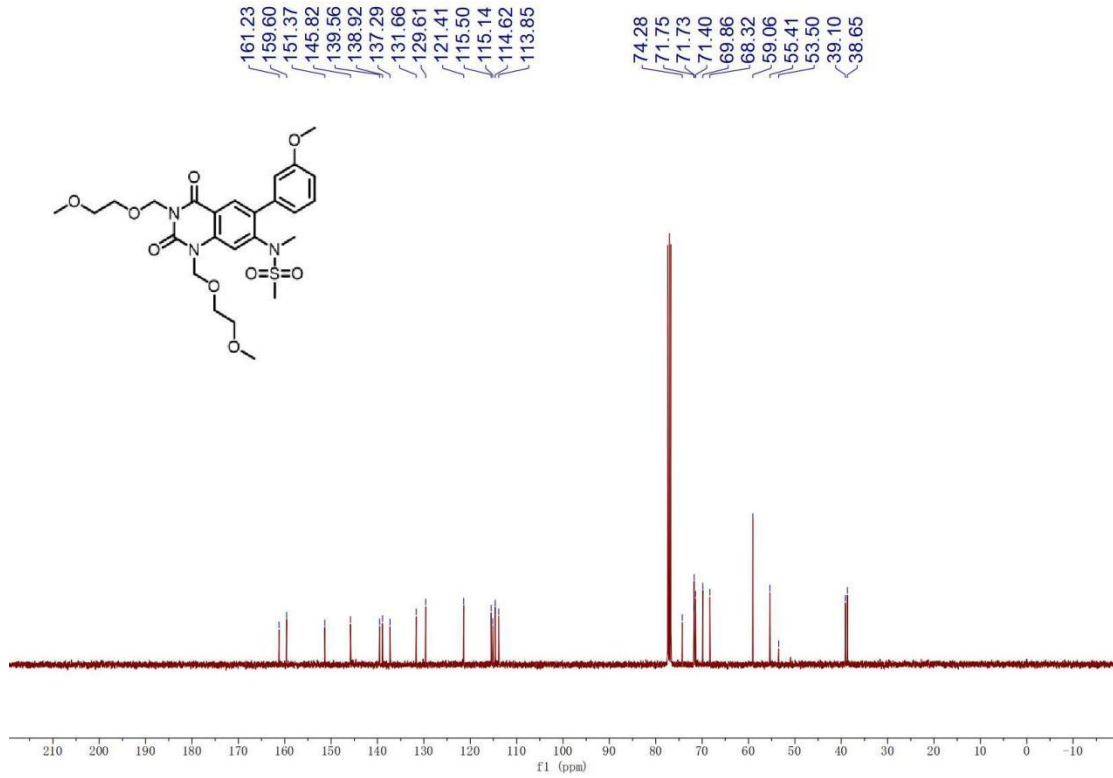

<sup>1</sup>H NMR (400 MHz, CDCl<sub>3</sub>) Spectra of **3m**

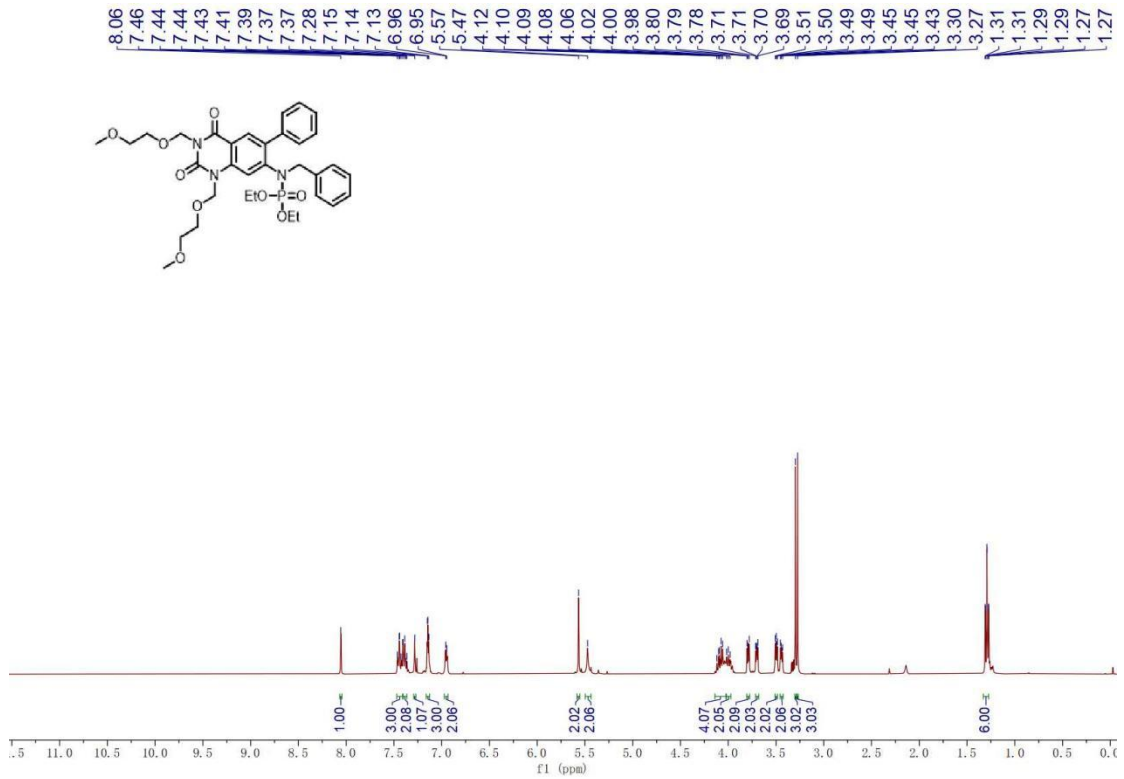

<sup>13</sup>C NMR (101 MHz, CDCl<sub>3</sub>) Spectra of **3m**

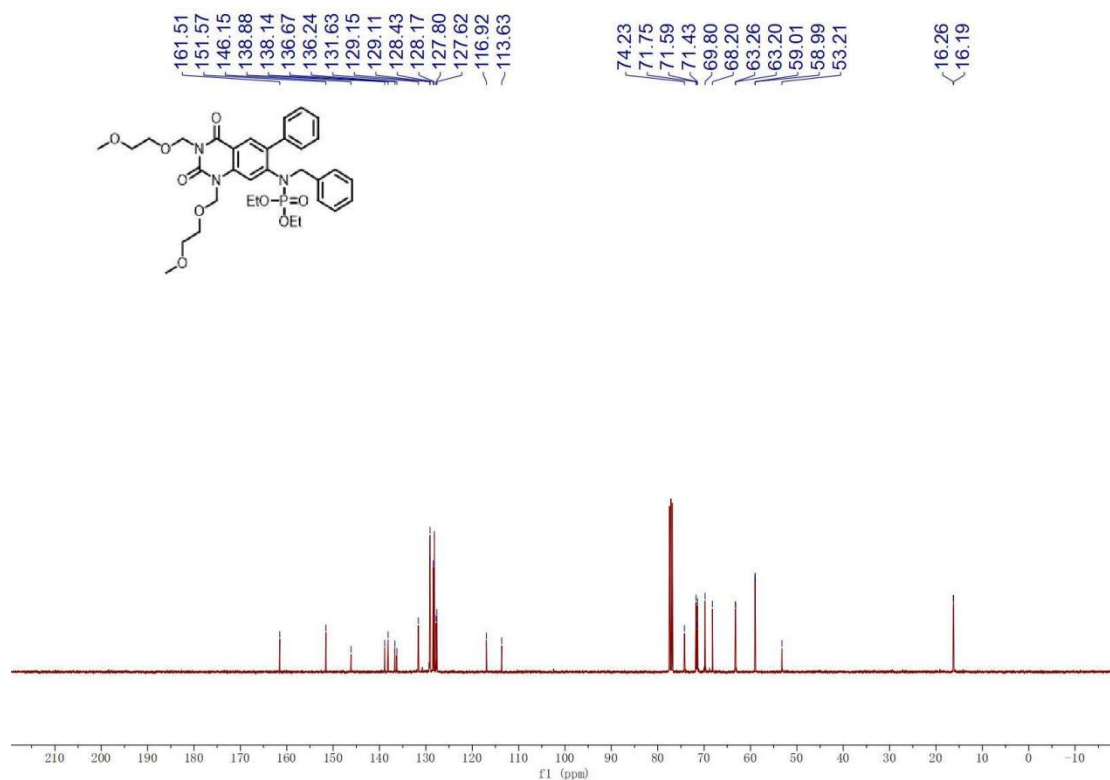

<sup>31</sup>P NMR (162 MHz, CDCl<sub>3</sub>) Spectra of **3m**

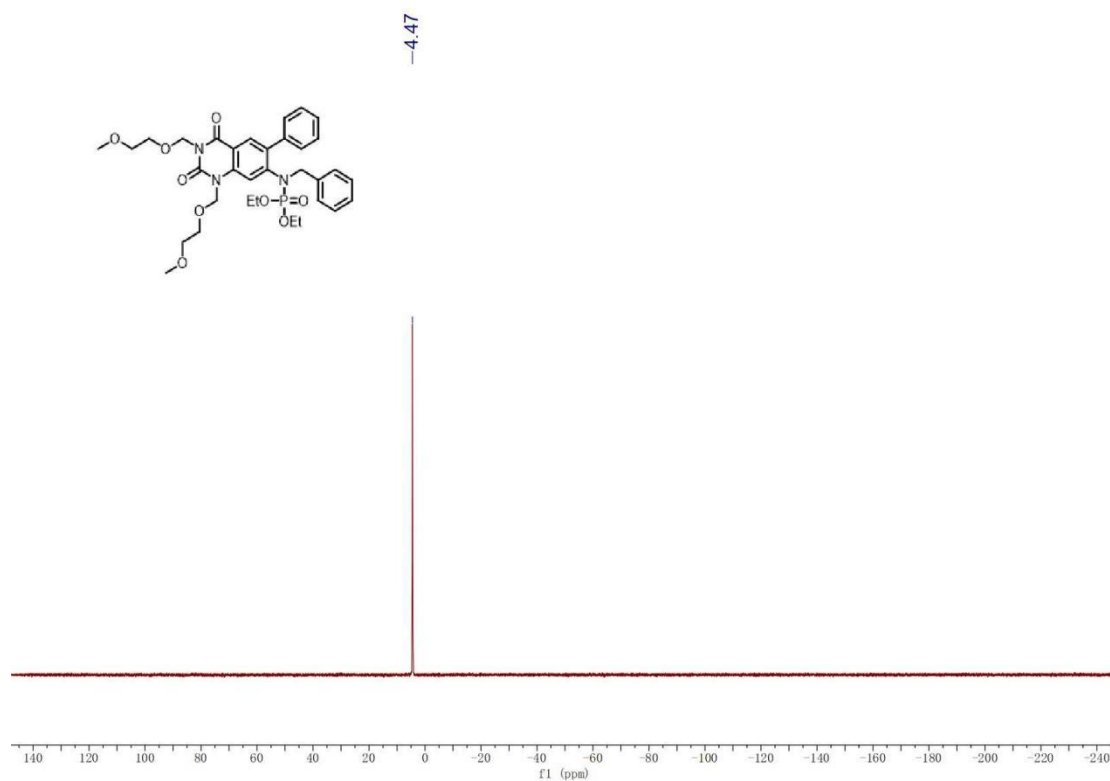

<sup>1</sup>H NMR (400 MHz, CDCl<sub>3</sub>) Spectra of **3n**

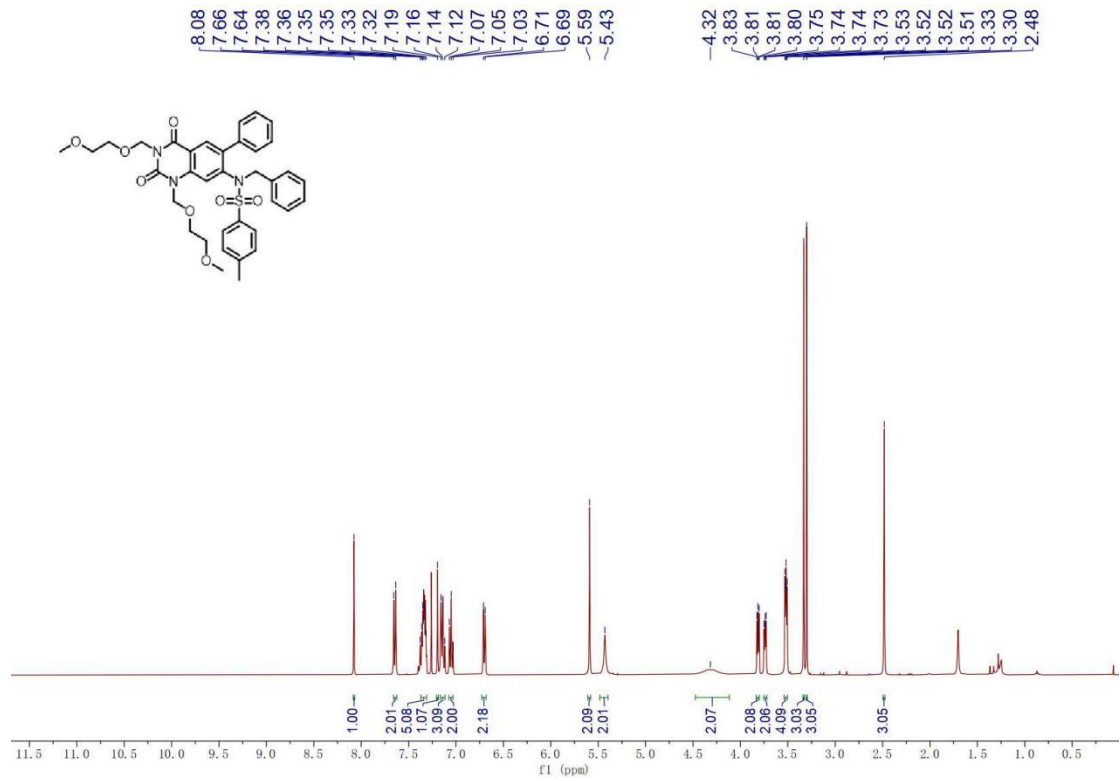

<sup>13</sup>C NMR (101 MHz, CDCl<sub>3</sub>) Spectra of **3n**

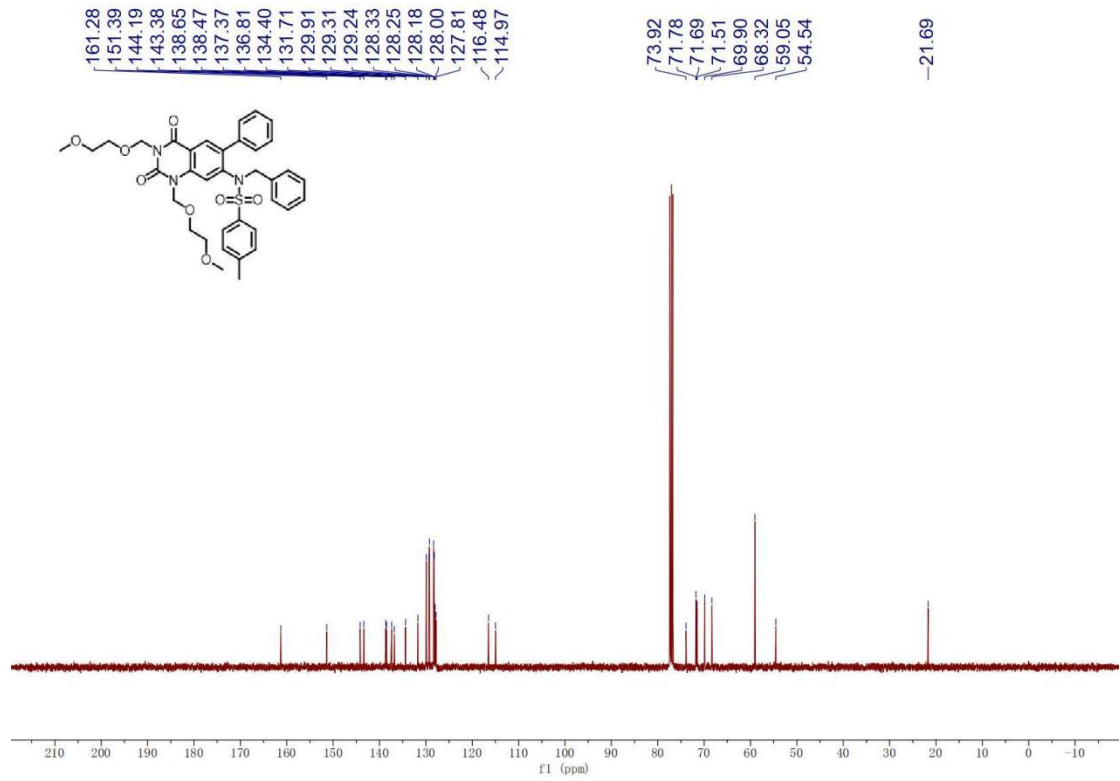

<sup>1</sup>H NMR (400 MHz, CDCl<sub>3</sub>) Spectra of **3o**

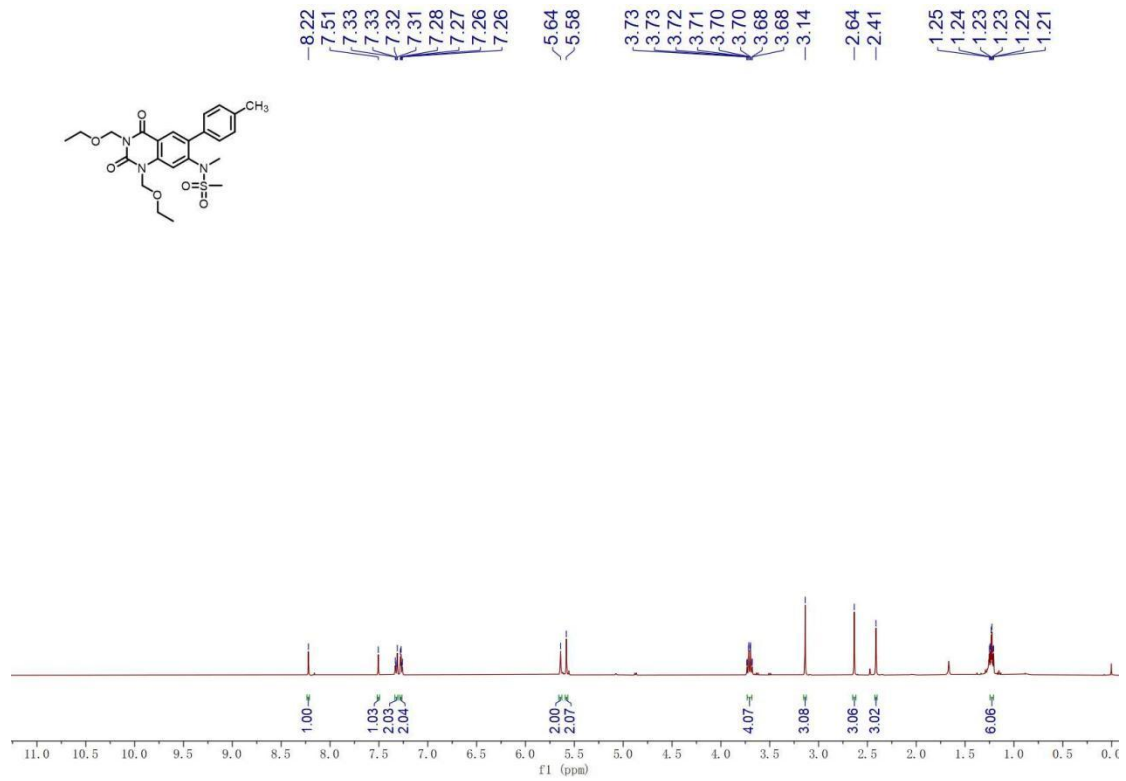

<sup>13</sup>C NMR (101 MHz, CDCl<sub>3</sub>) Spectra of **3o**

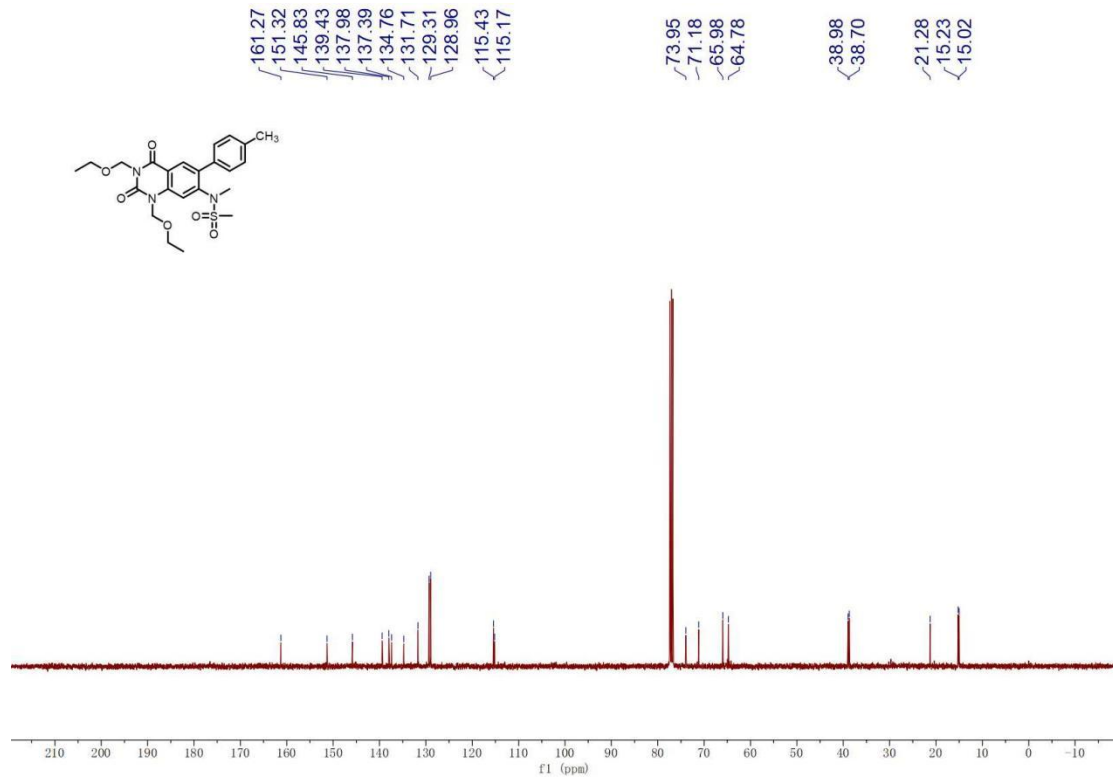

<sup>1</sup>H NMR (400 MHz, CDCl<sub>3</sub>) Spectra of **3p**

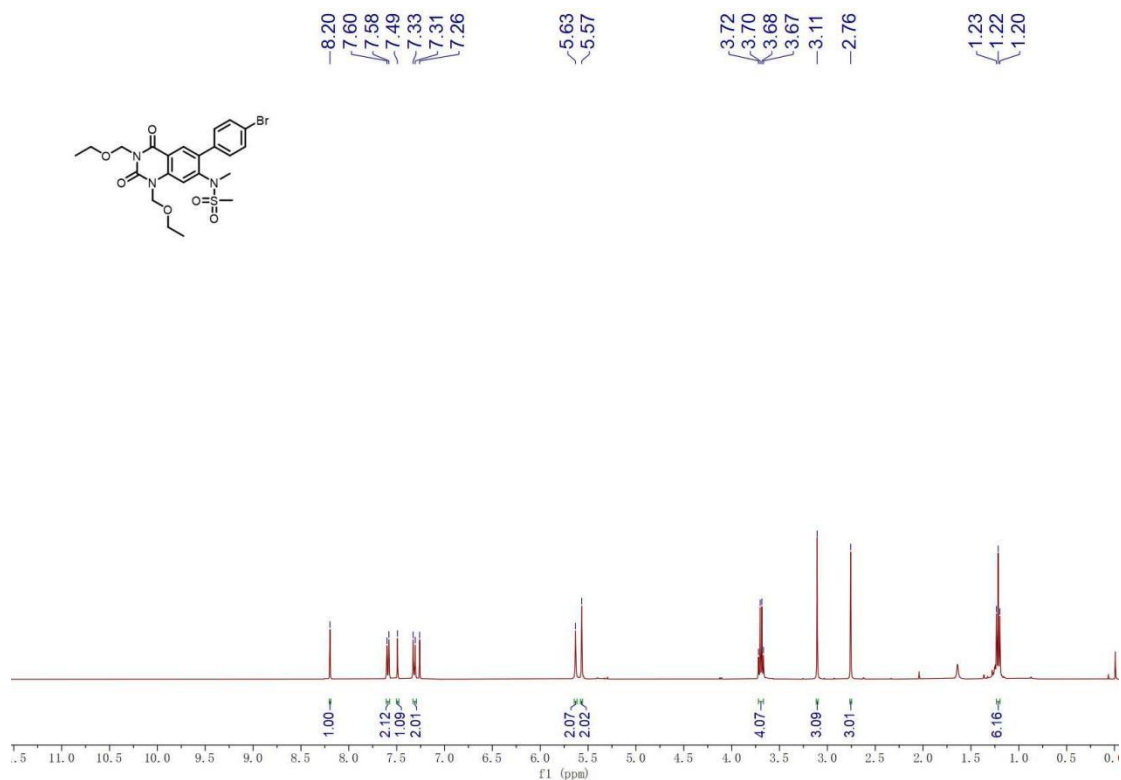

<sup>13</sup>C NMR (101 MHz, CDCl<sub>3</sub>) Spectra of **3p**

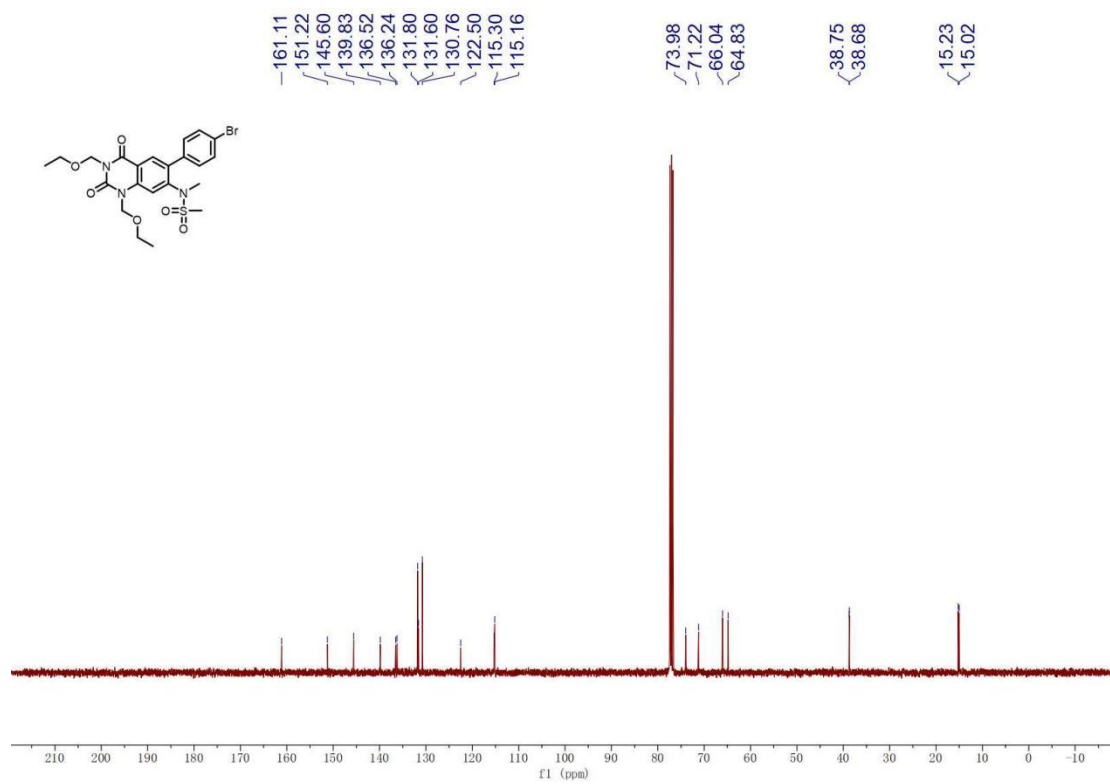

<sup>1</sup>H NMR (400 MHz, CDCl<sub>3</sub>) Spectra of **3q**

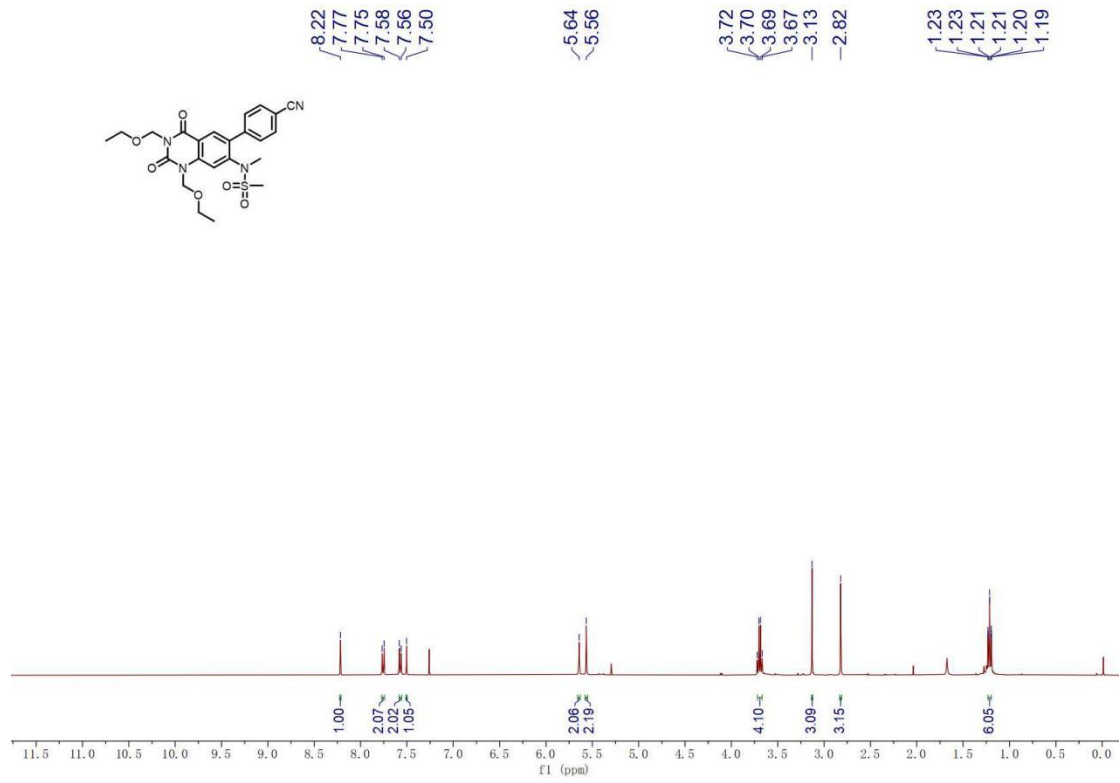

<sup>13</sup>C NMR (101 MHz, CDCl<sub>3</sub>) Spectra of **3q**

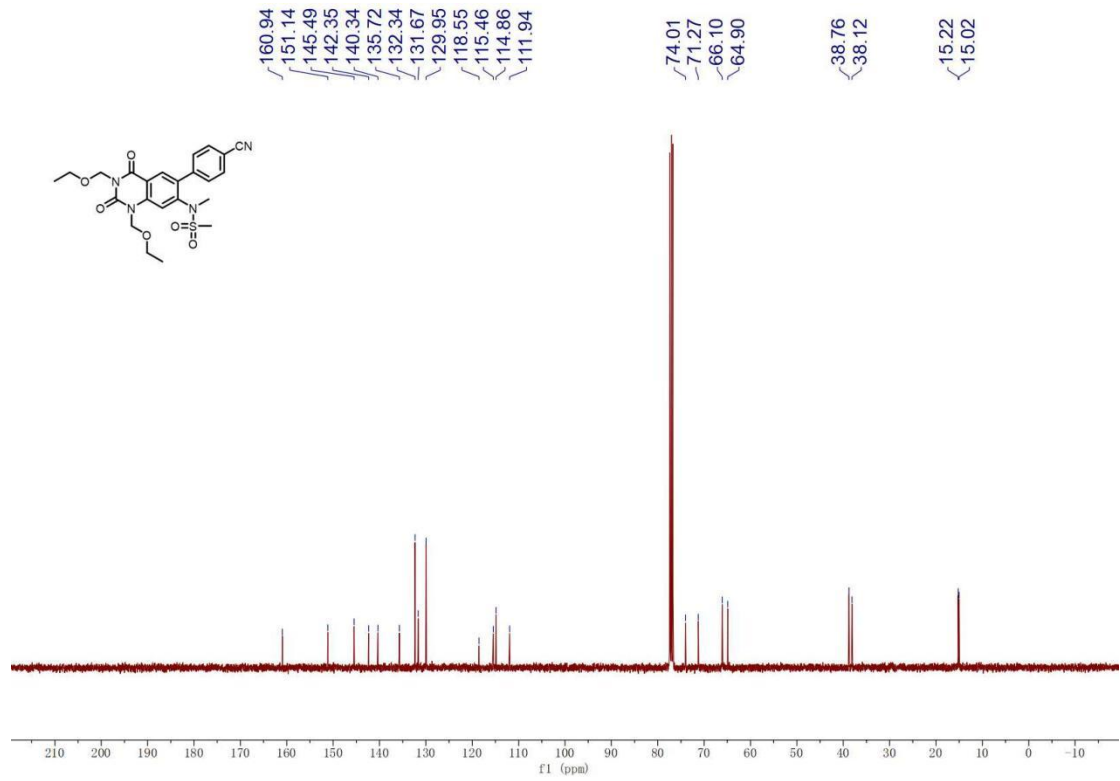

<sup>1</sup>H NMR (400 MHz, CDCl<sub>3</sub>) Spectra of **3r**

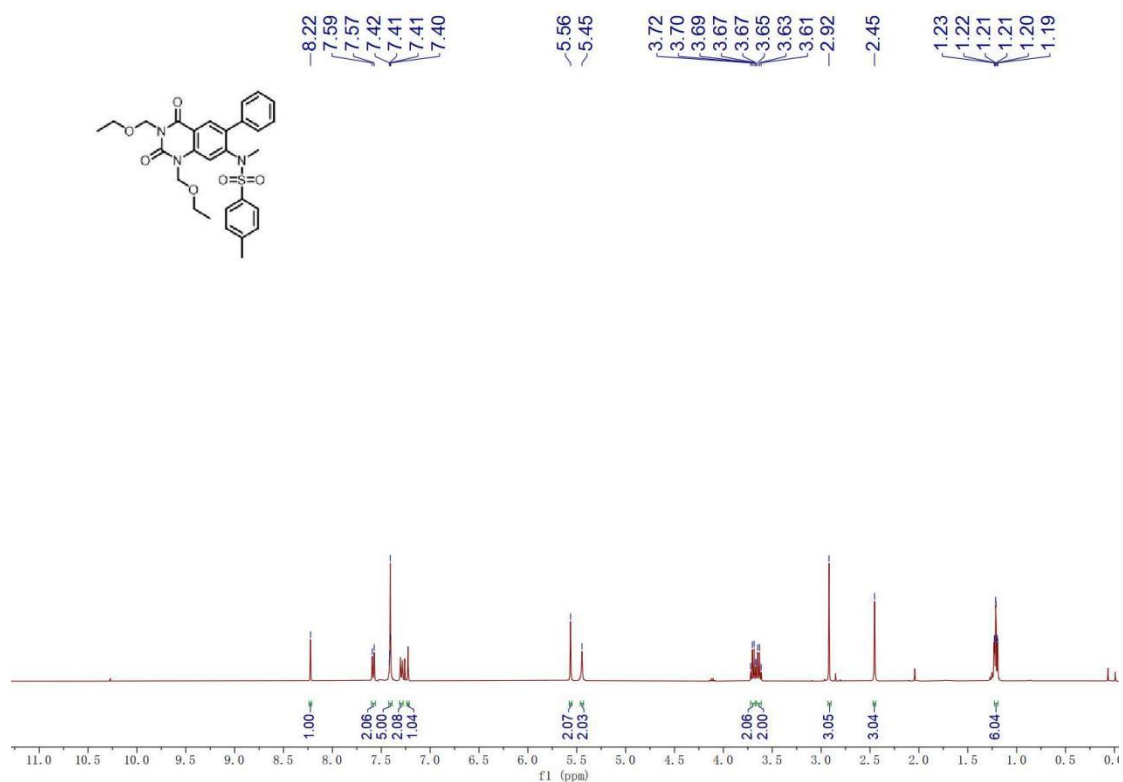

<sup>13</sup>C NMR (101 MHz, CDCl<sub>3</sub>) Spectra of **3r**

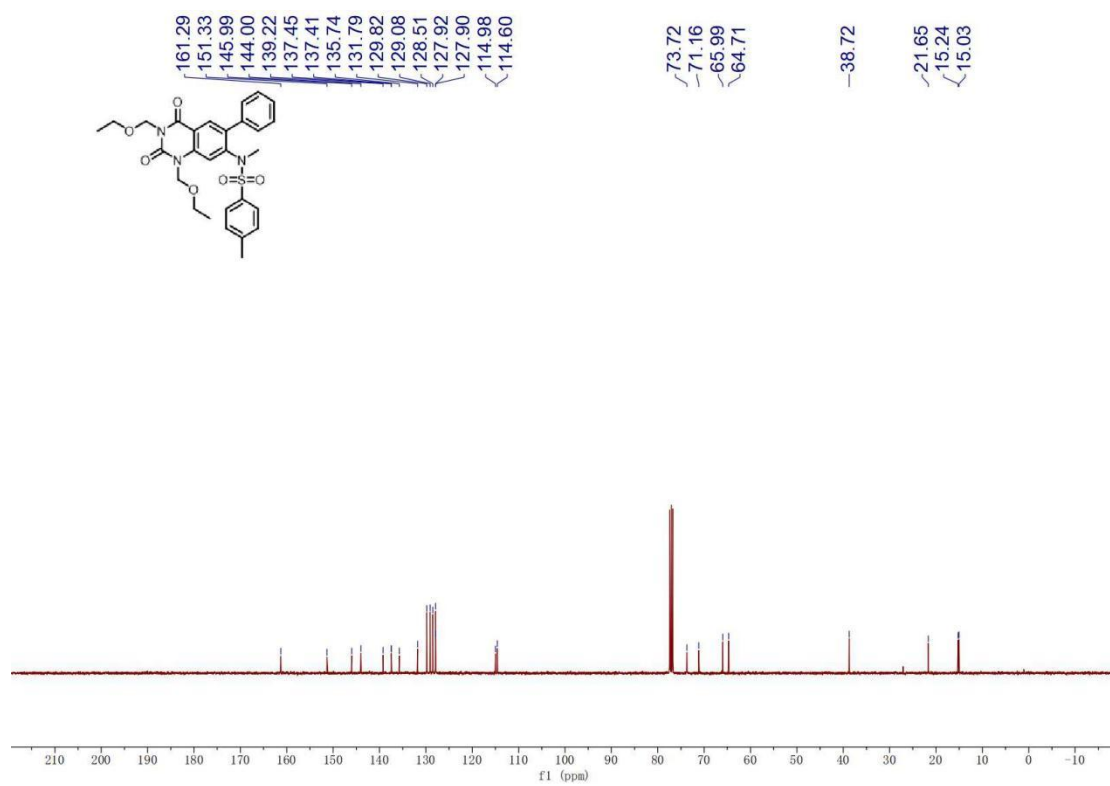

<sup>1</sup>H NMR (400 MHz, CDCl<sub>3</sub>) Spectra of **3s**

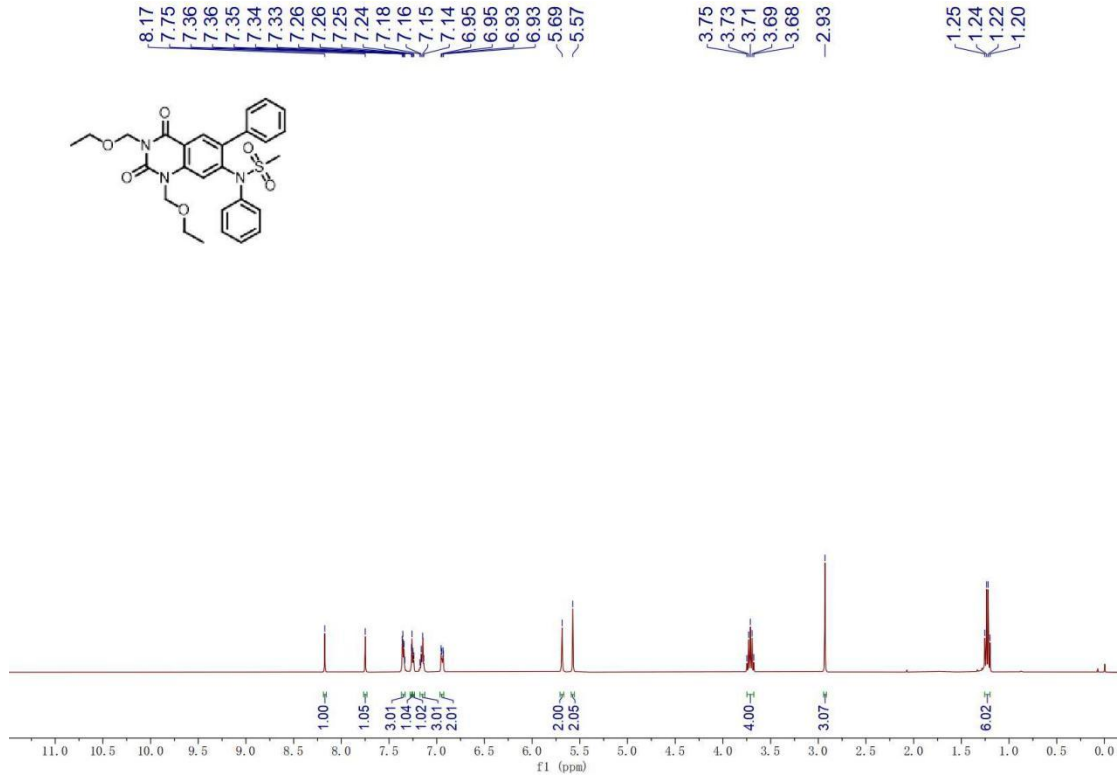

<sup>13</sup>C NMR (101 MHz, CDCl<sub>3</sub>) Spectra of **3s**

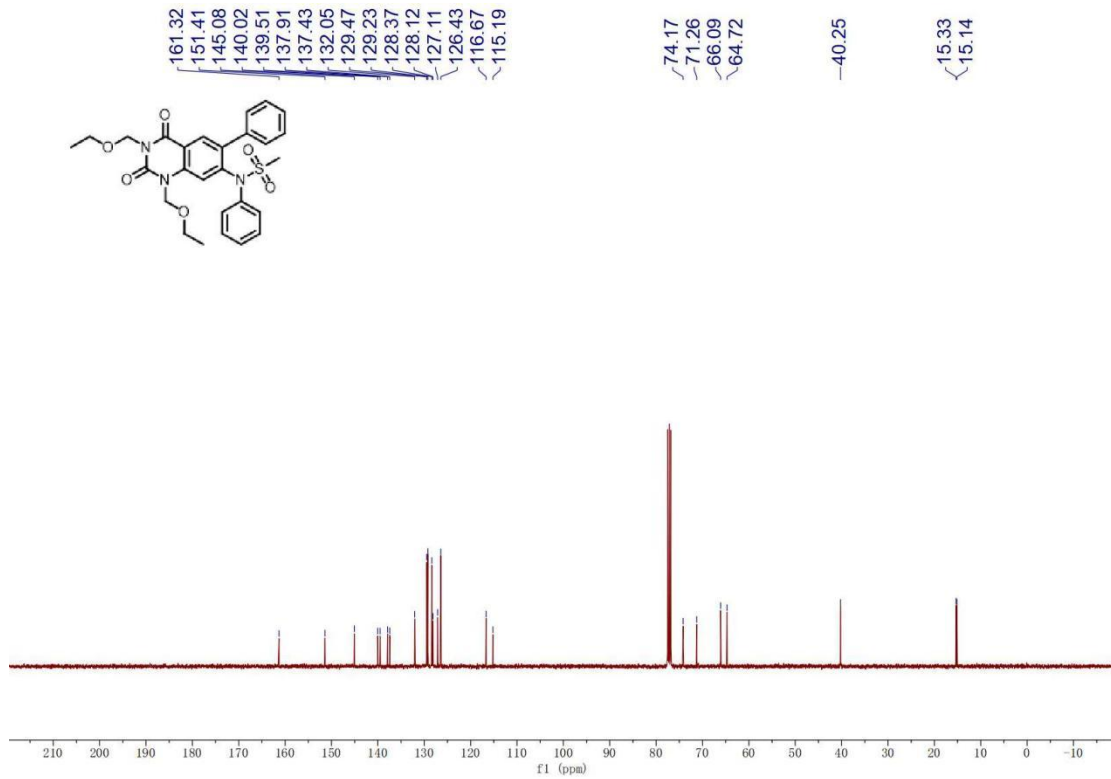

<sup>1</sup>H NMR (400 MHz, CDCl<sub>3</sub>) Spectra of **3t**

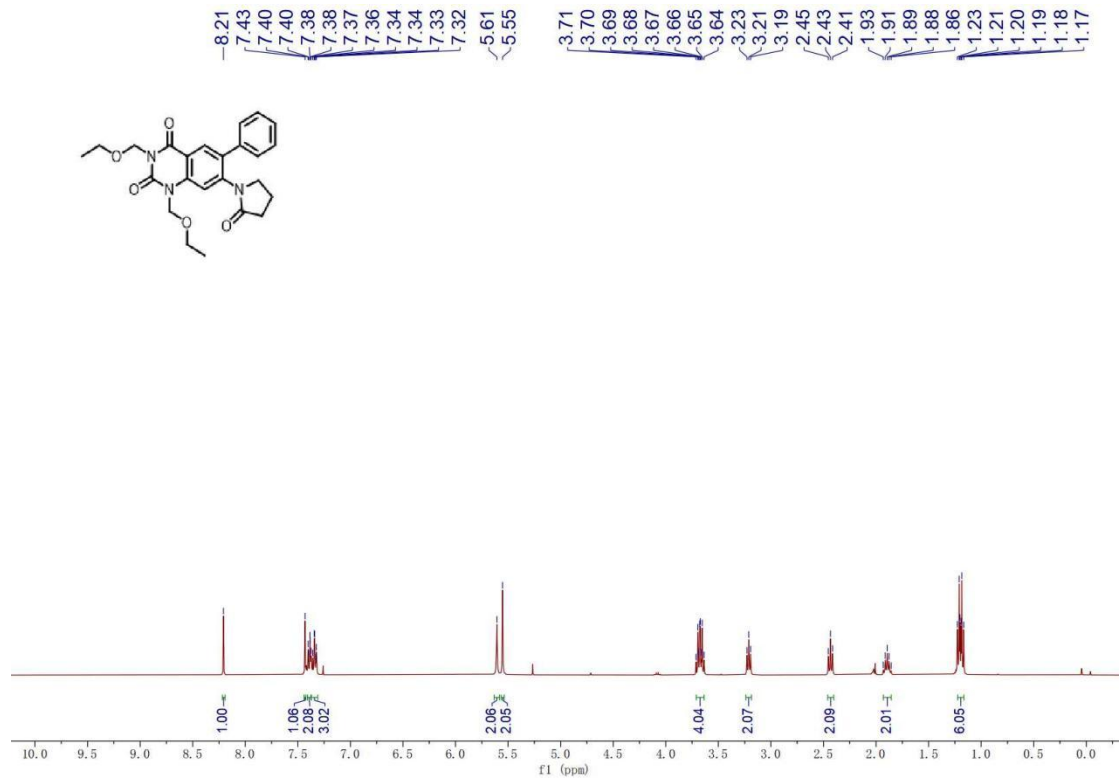

<sup>13</sup>C NMR (101 MHz, CDCl<sub>3</sub>) Spectra of **3t**

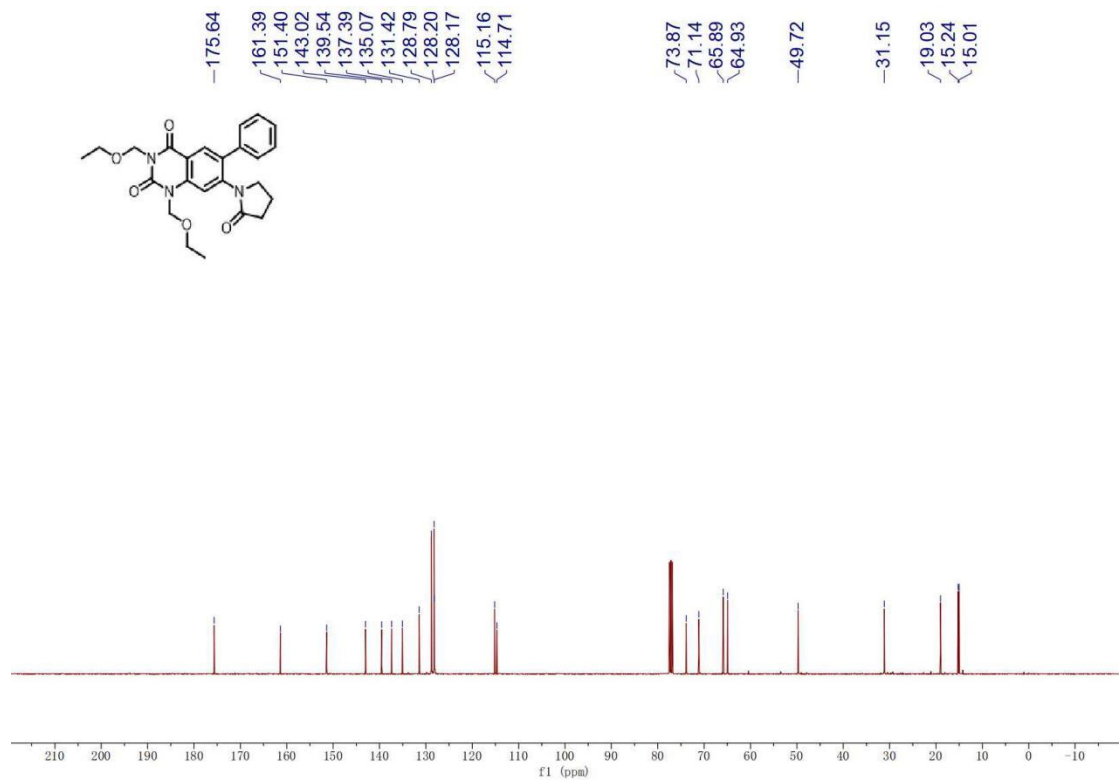

<sup>1</sup>H NMR (400 MHz, CDCl<sub>3</sub>) Spectra of **3u**

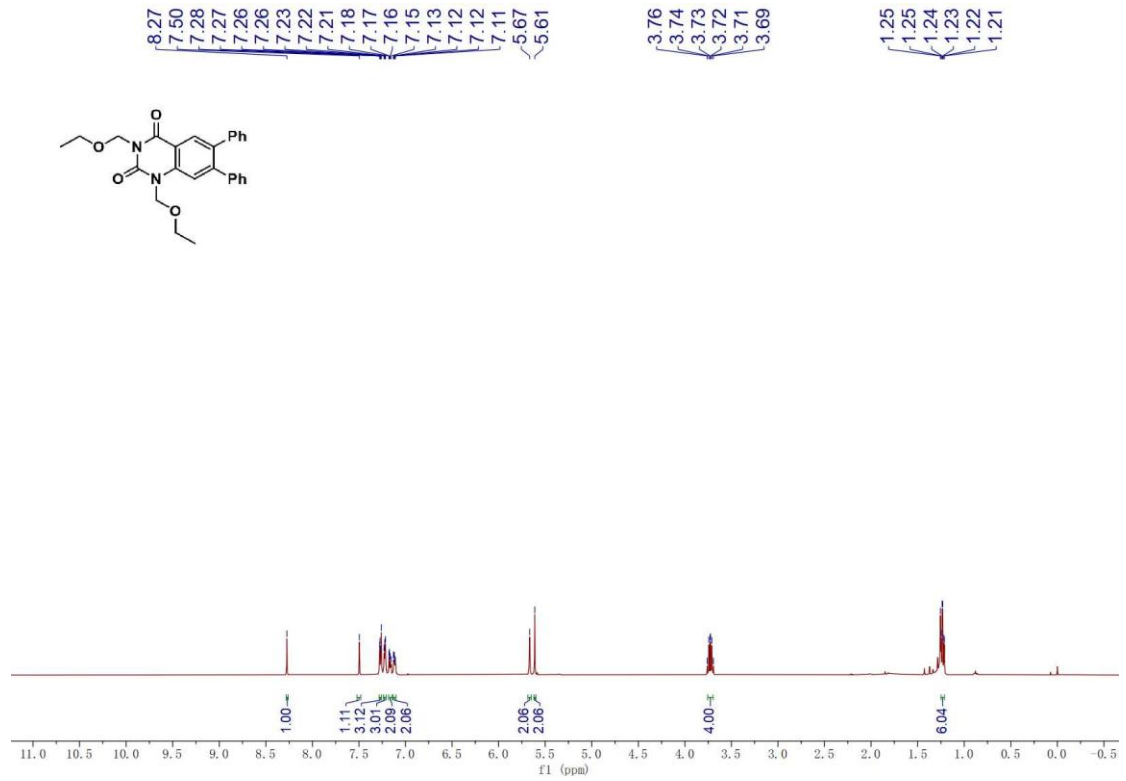

<sup>13</sup>C NMR (101 MHz, CDCl<sub>3</sub>) Spectra of **3u**

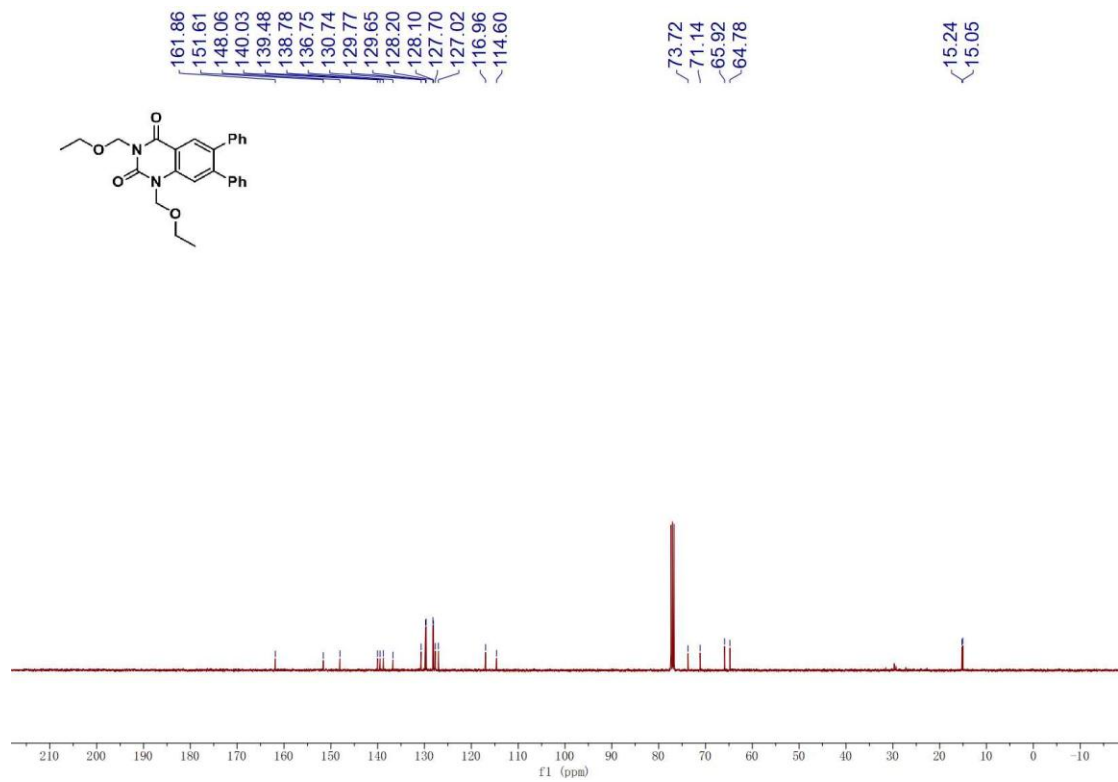

<sup>1</sup>H NMR (400 MHz, CDCl<sub>3</sub>) Spectra of **4a**

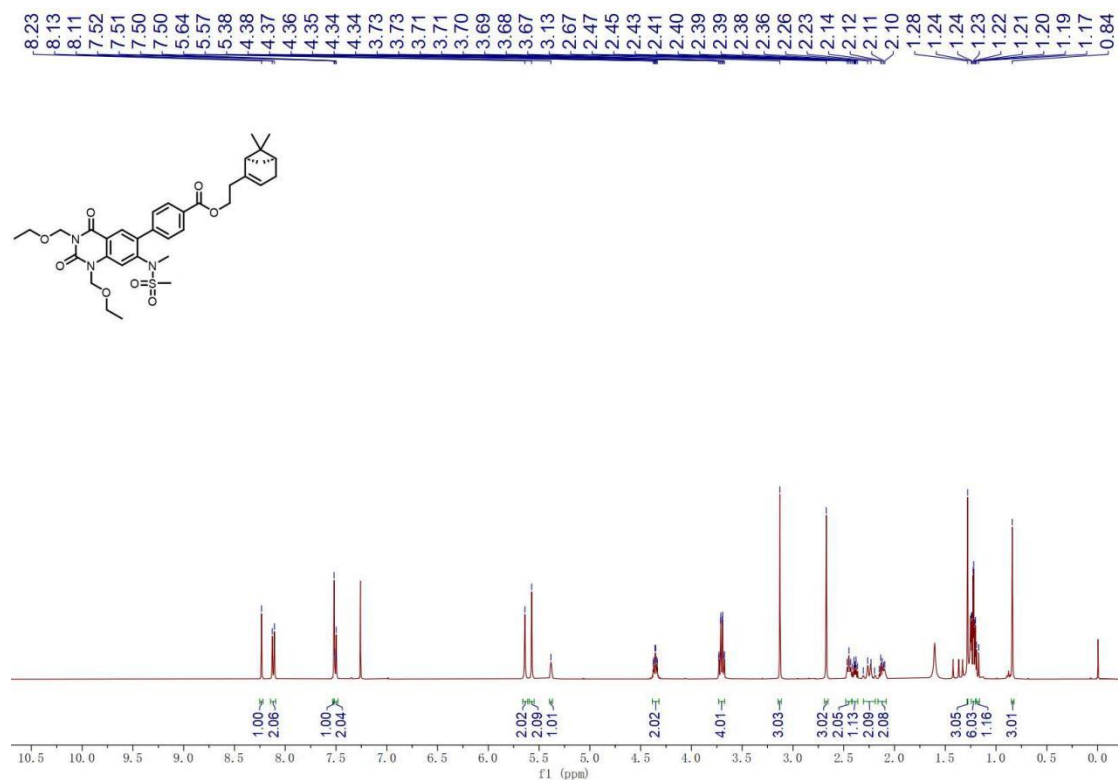

<sup>13</sup>C NMR (101 MHz, CDCl<sub>3</sub>) Spectra of **4a**

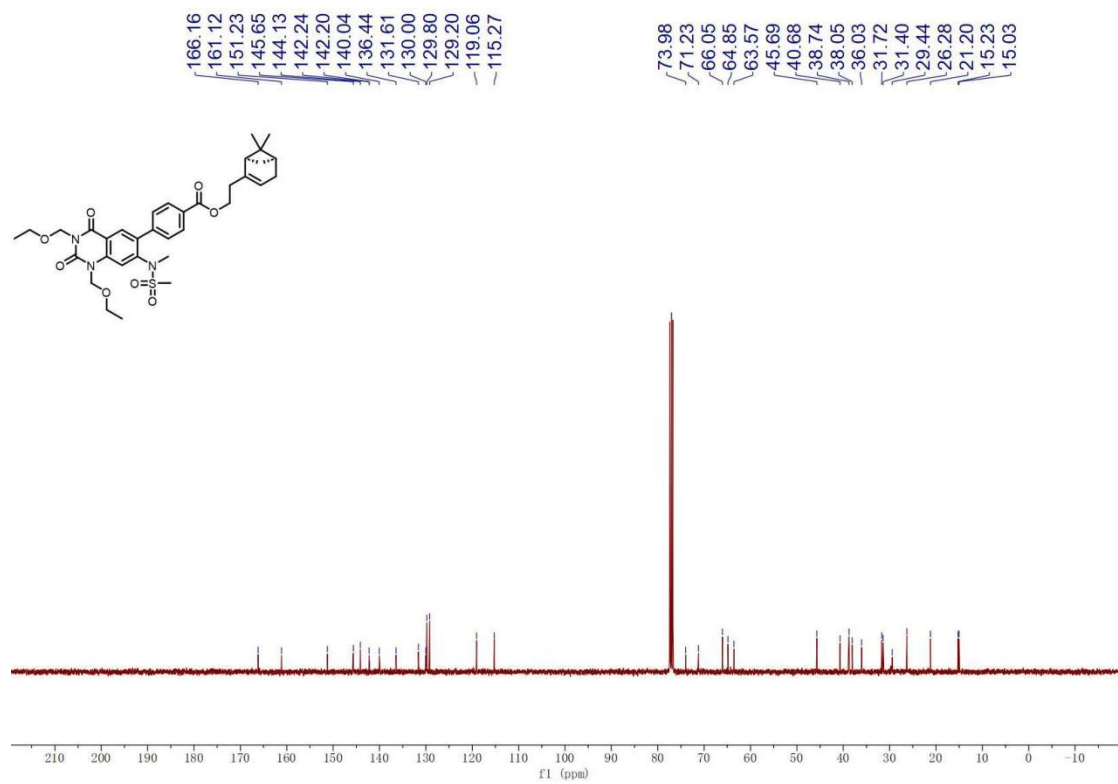

<sup>1</sup>H NMR (400 MHz, CDCl<sub>3</sub>) Spectra of **4b**

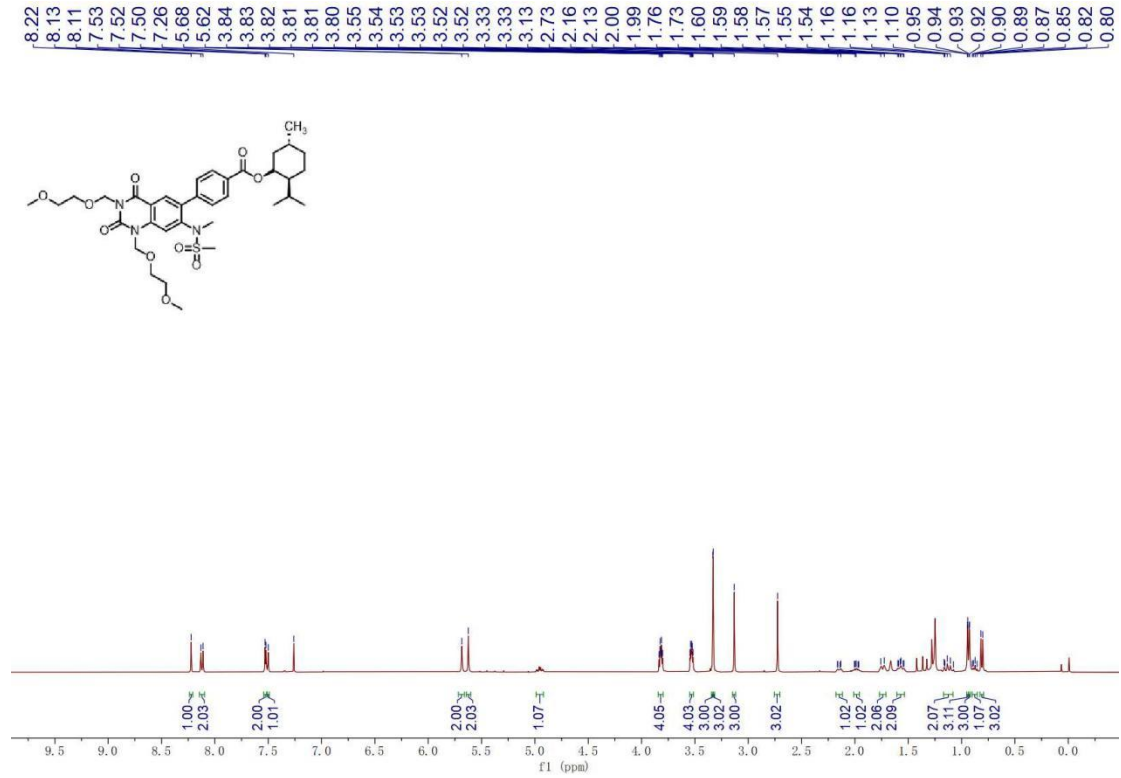

<sup>13</sup>C NMR (101 MHz, CDCl<sub>3</sub>) Spectra of **4b**

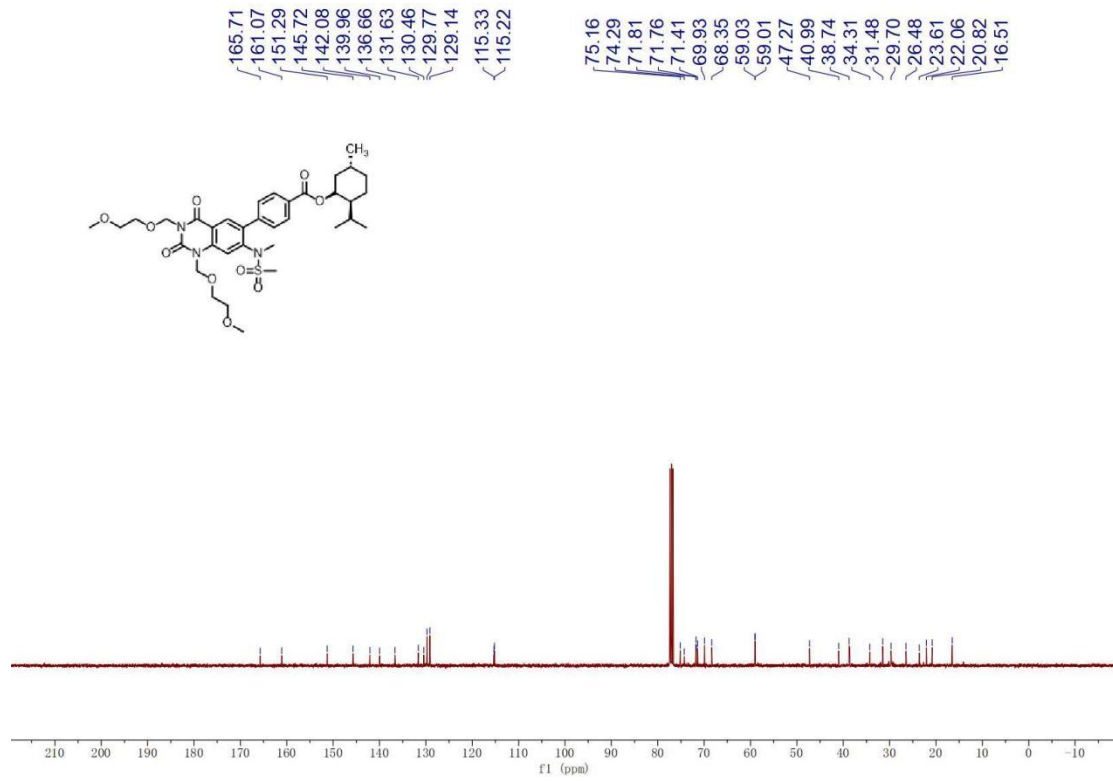

<sup>1</sup>H NMR (400 MHz, CDCl<sub>3</sub>) Spectra of **4c**

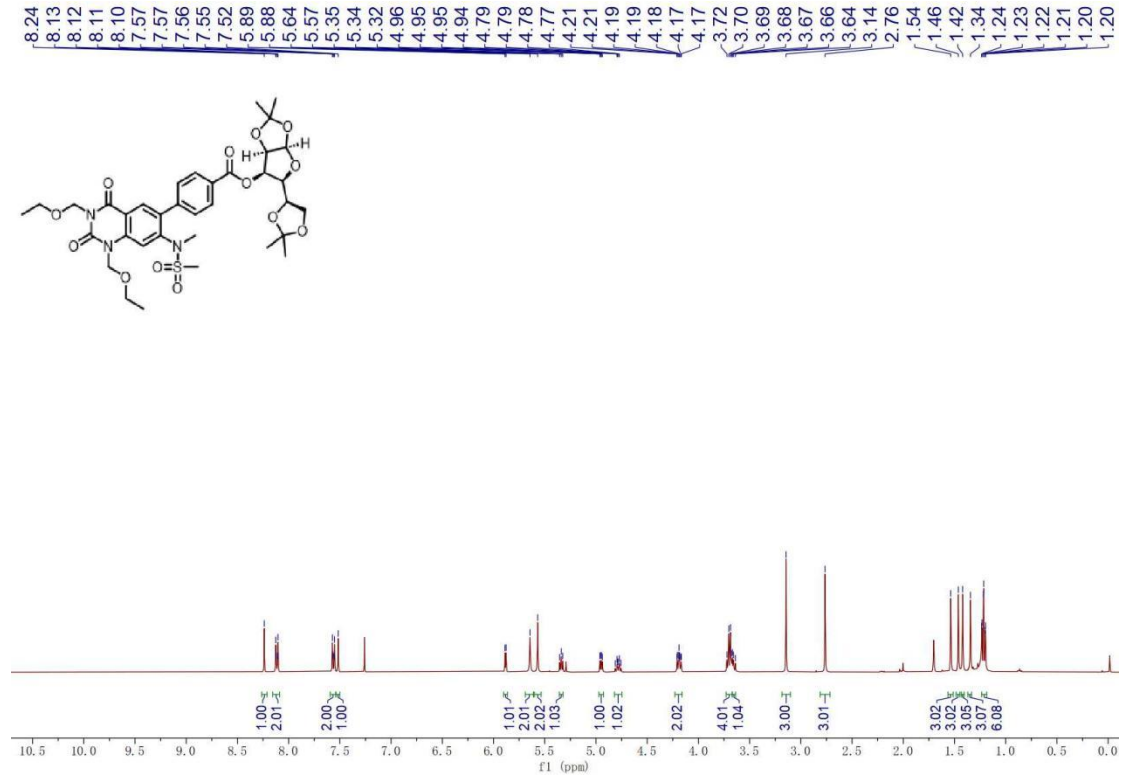

<sup>13</sup>C NMR (101 MHz, CDCl<sub>3</sub>) Spectra of **4c**

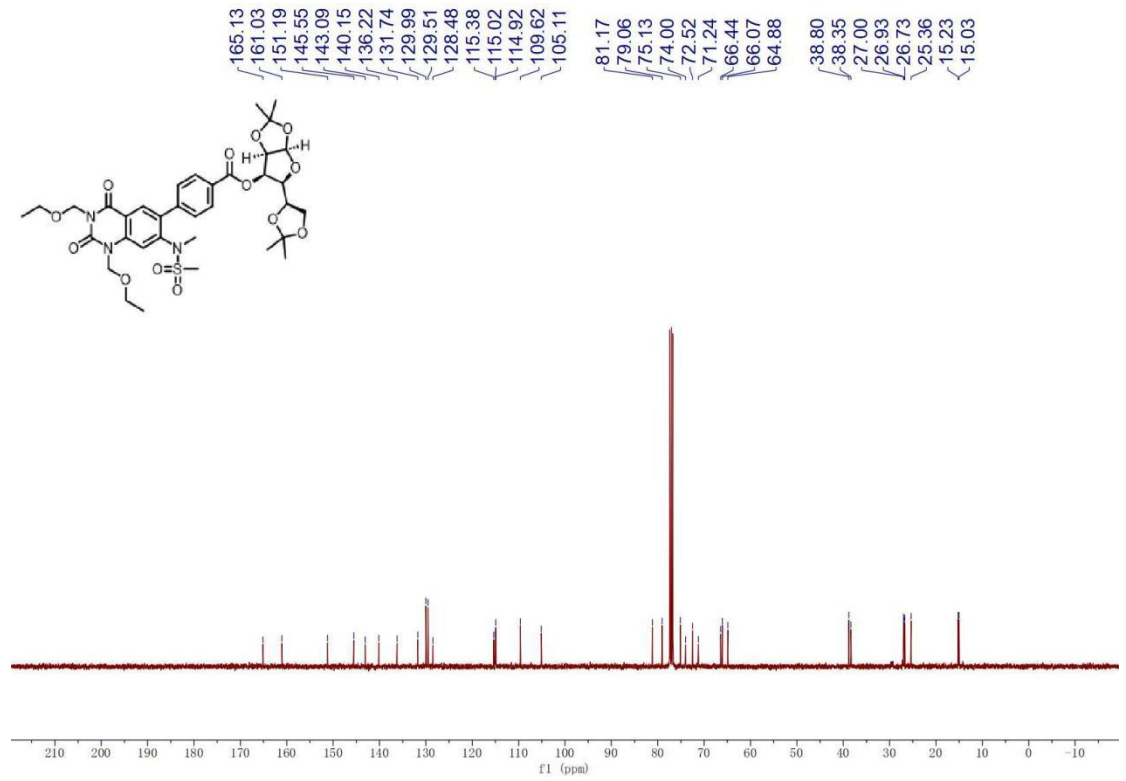

<sup>1</sup>H NMR (400 MHz, CDCl<sub>3</sub>) Spectra of **4d**

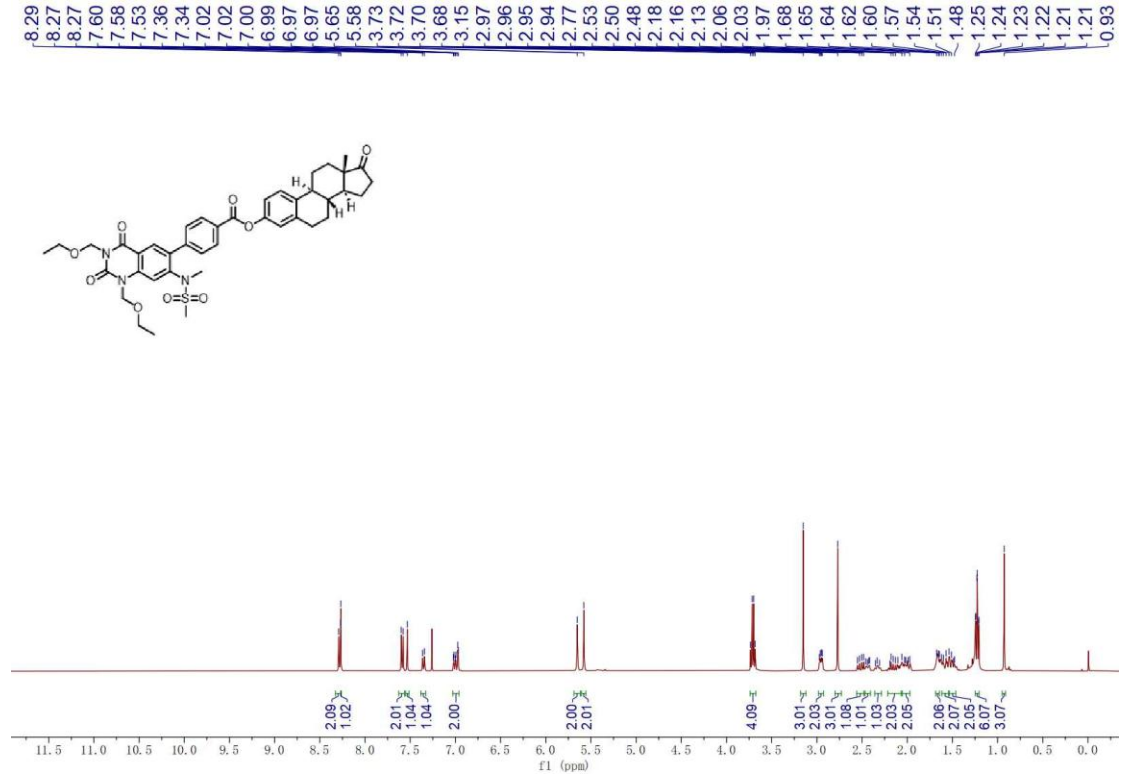

<sup>13</sup>C NMR (101 MHz, CDCl<sub>3</sub>) Spectra of **4d**

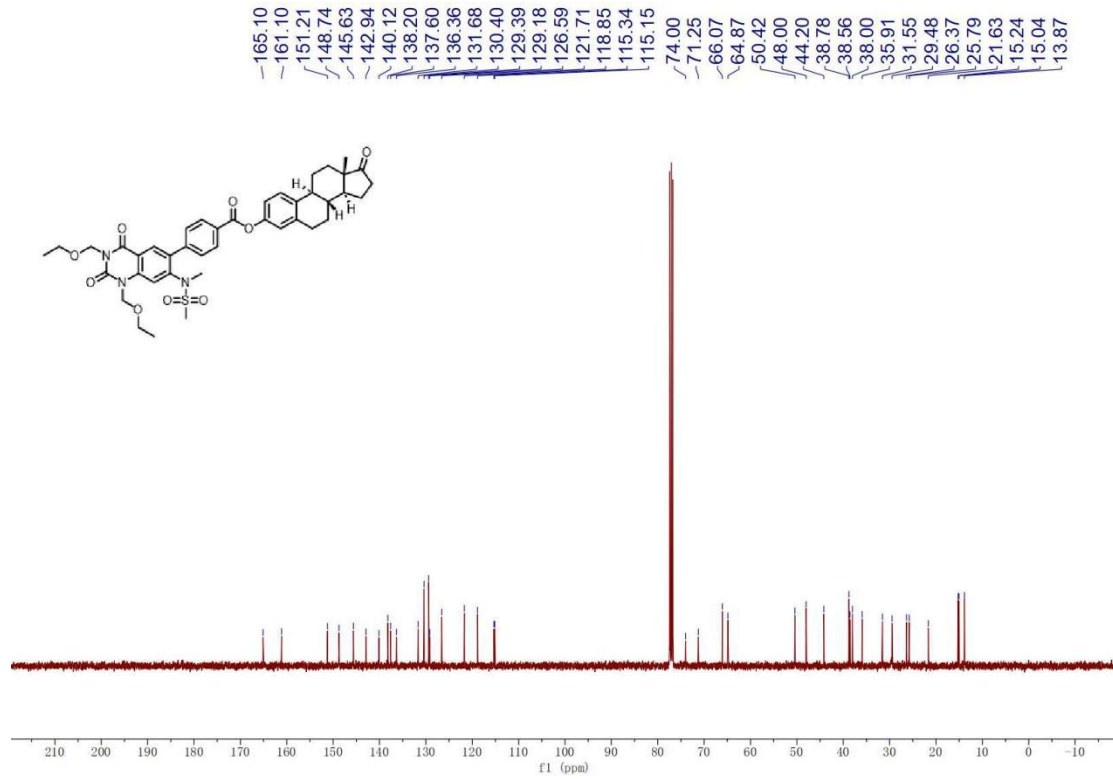

<sup>1</sup>H NMR (400 MHz, CDCl<sub>3</sub>) Spectra of **4e**

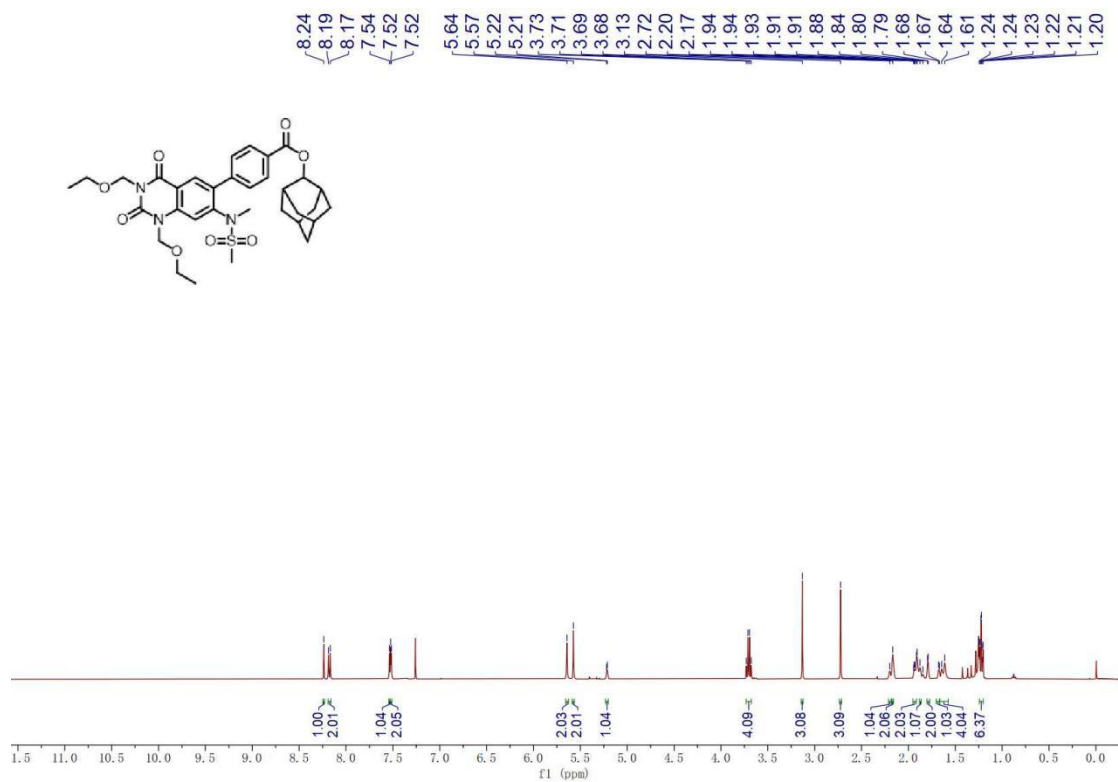

<sup>13</sup>C NMR (101 MHz, CDCl<sub>3</sub>) Spectra of **4e**

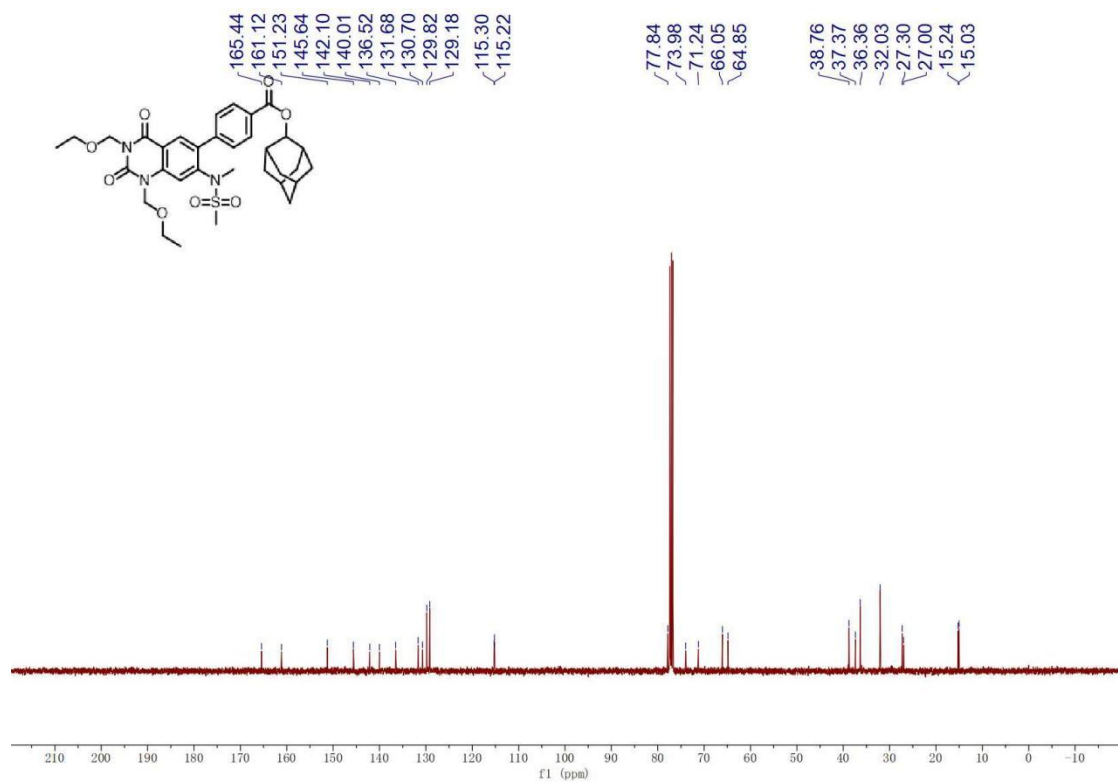

<sup>1</sup>H NMR (400 MHz, CDCl<sub>3</sub>) Spectra of **4f**

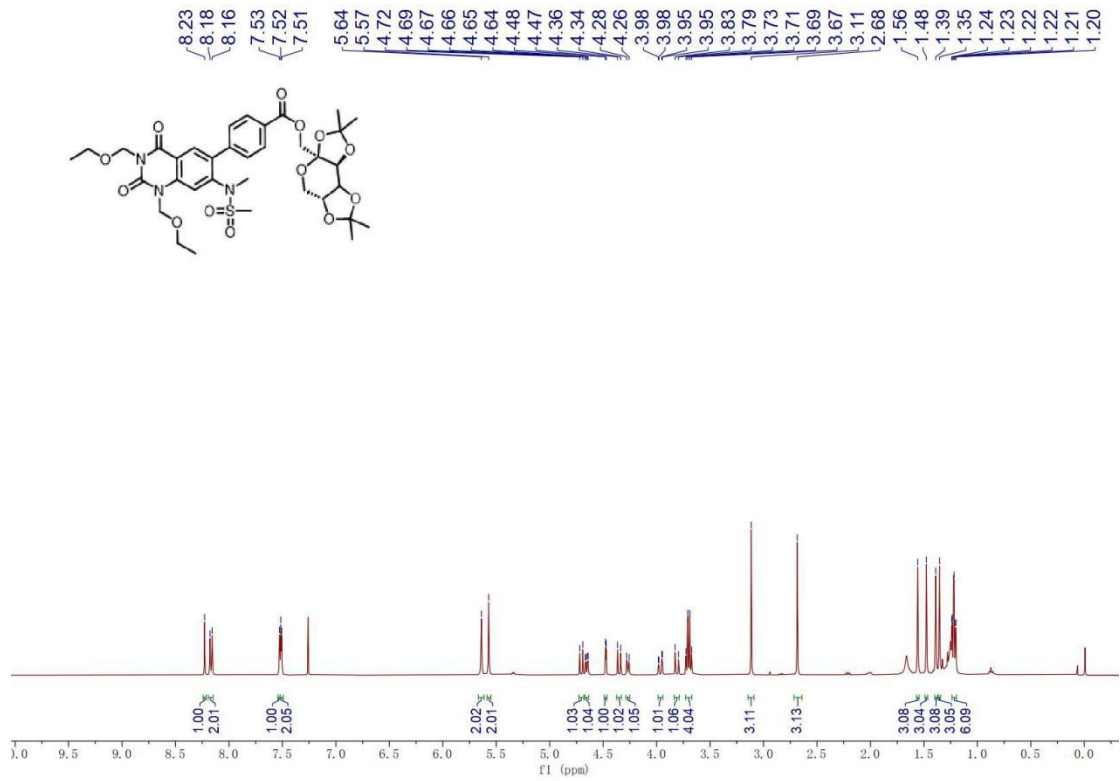

<sup>13</sup>C NMR (101 MHz, CDCl<sub>3</sub>) Spectra of **4f**

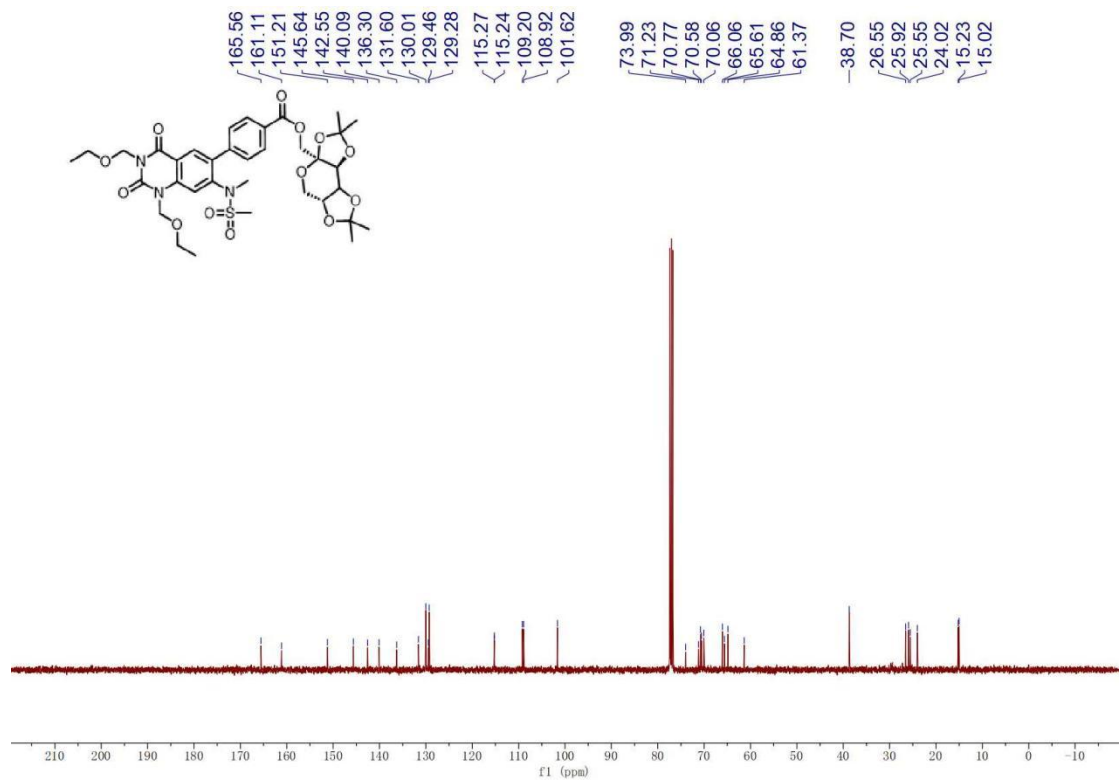

<sup>1</sup>H NMR (400 MHz, CDCl<sub>3</sub>) Spectra of **4g**

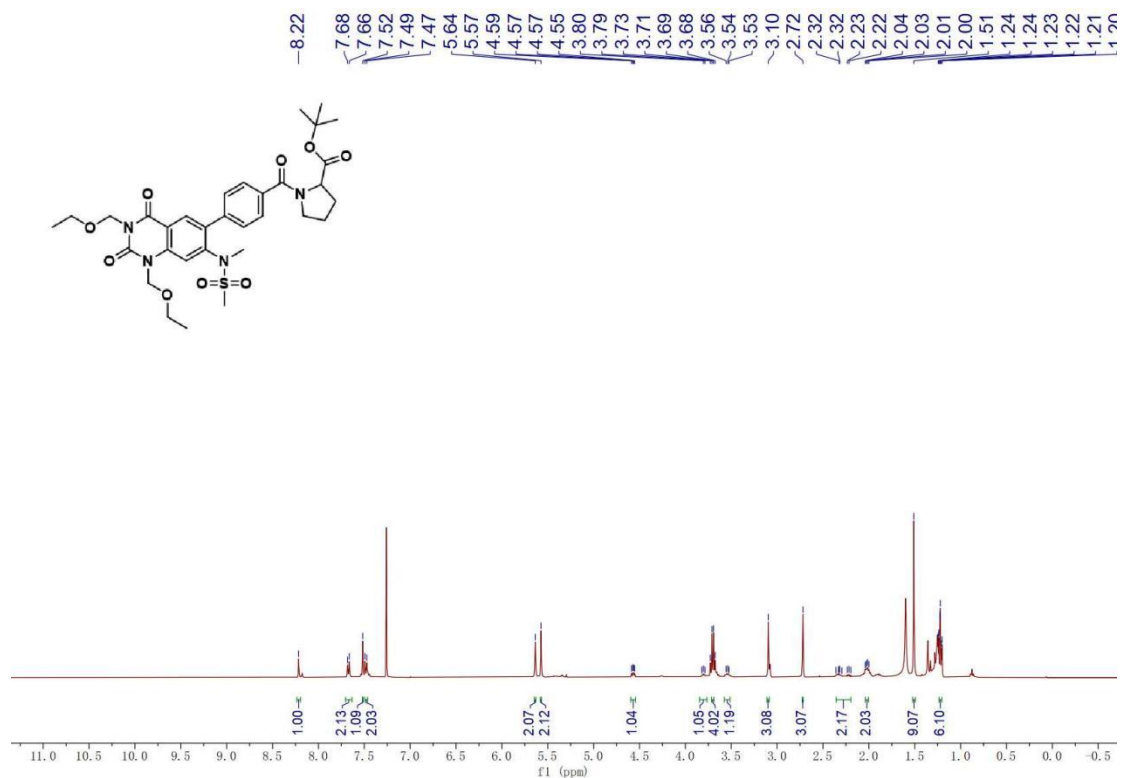

<sup>13</sup>C NMR (101 MHz, CDCl<sub>3</sub>) Spectra of **4g**

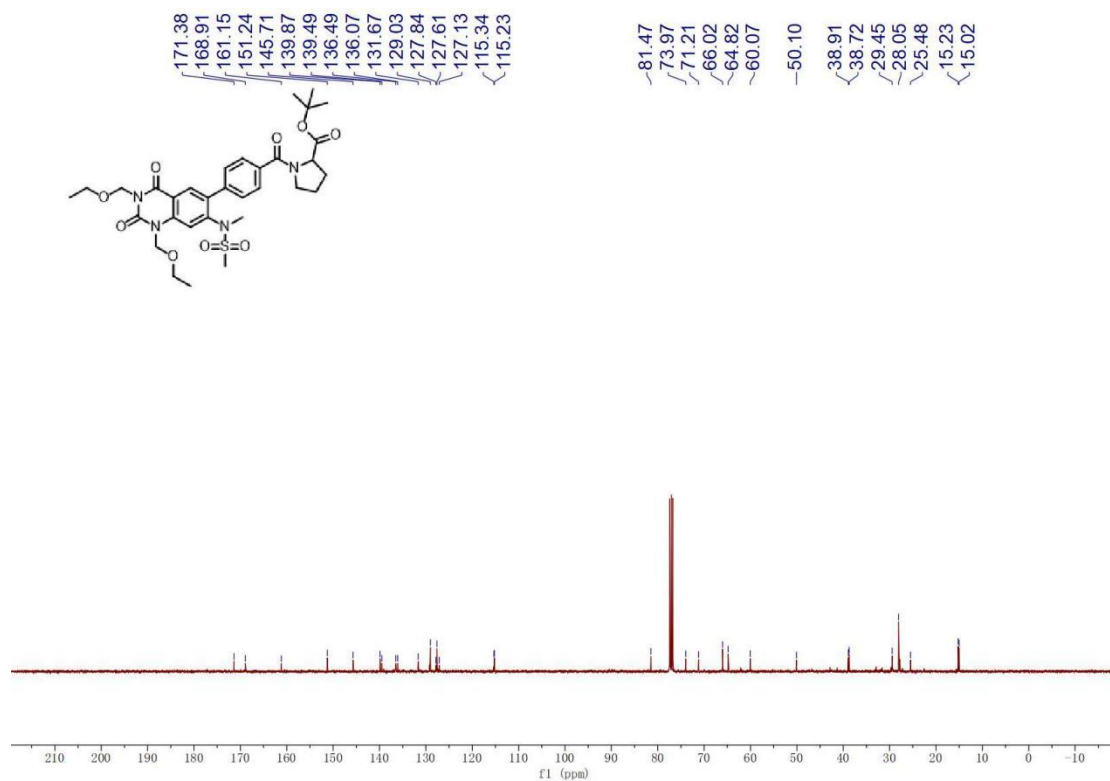

<sup>1</sup>H NMR (400 MHz, CDCl<sub>3</sub>) Spectra of **4h**

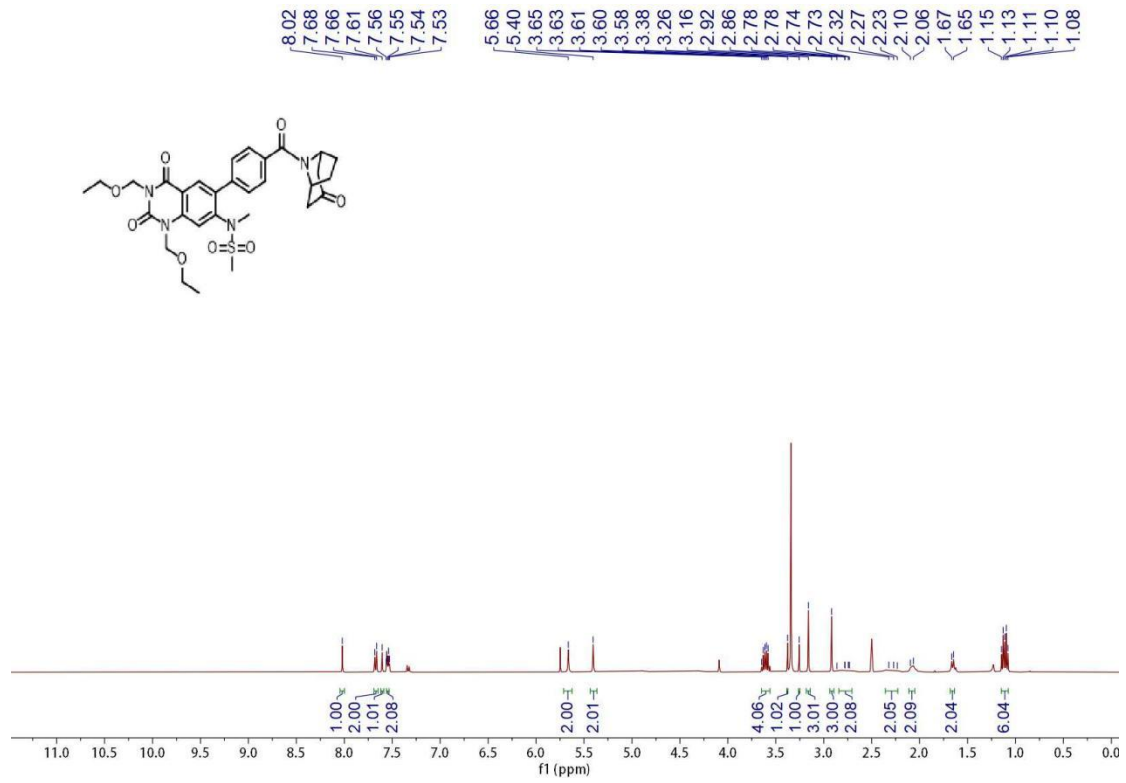

<sup>13</sup>C NMR (101 MHz, CDCl<sub>3</sub>) Spectra of **4h**

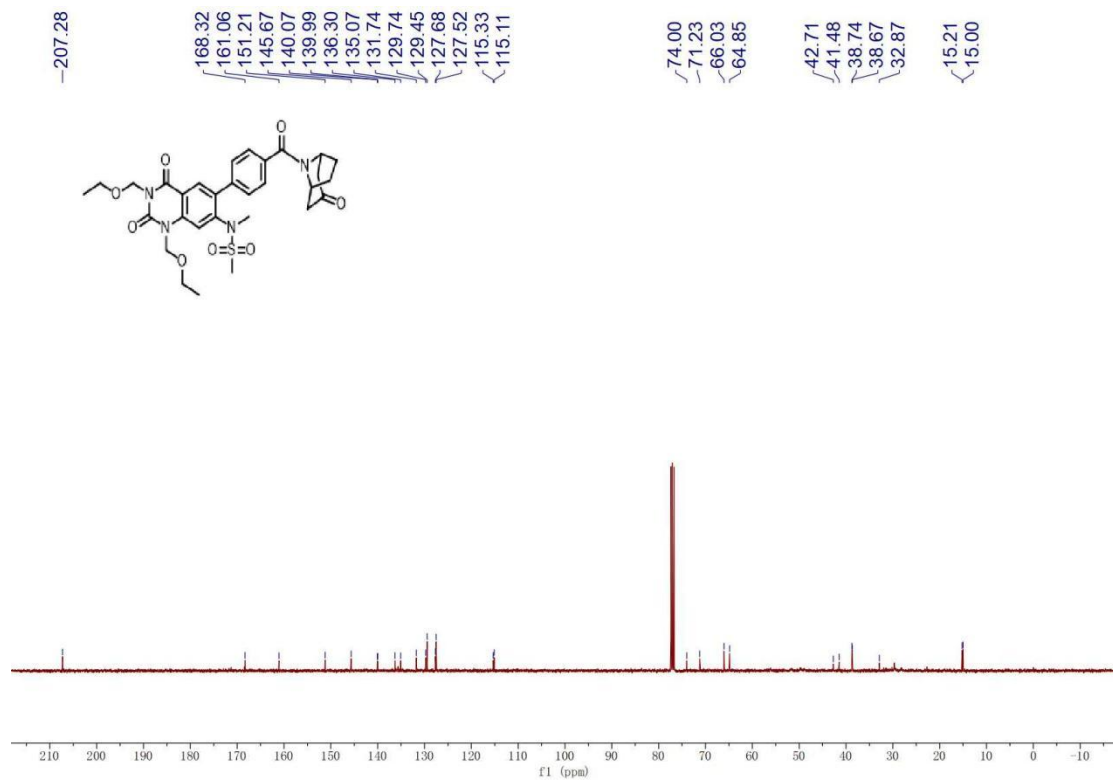

<sup>1</sup>H NMR (400 MHz, DMSO-*d*<sub>6</sub>) Spectra of **4i**

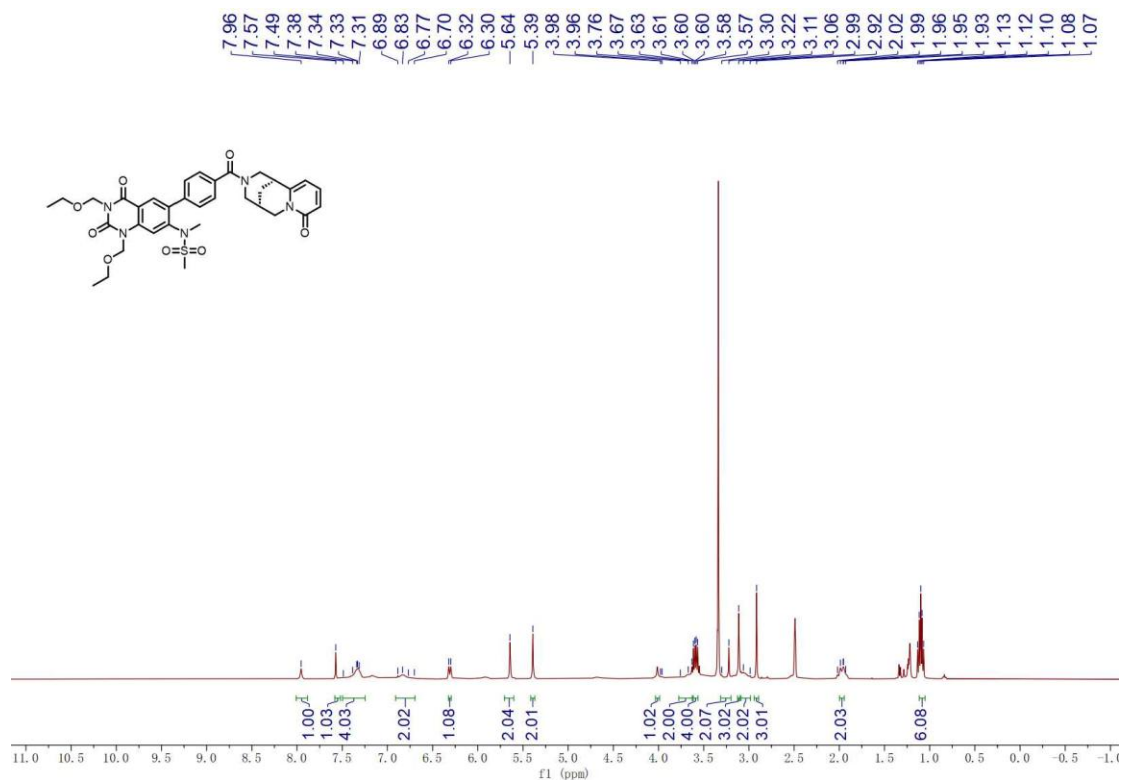

<sup>13</sup>C NMR (101 MHz, DMSO-*d*<sub>6</sub>) Spectra of **4i**

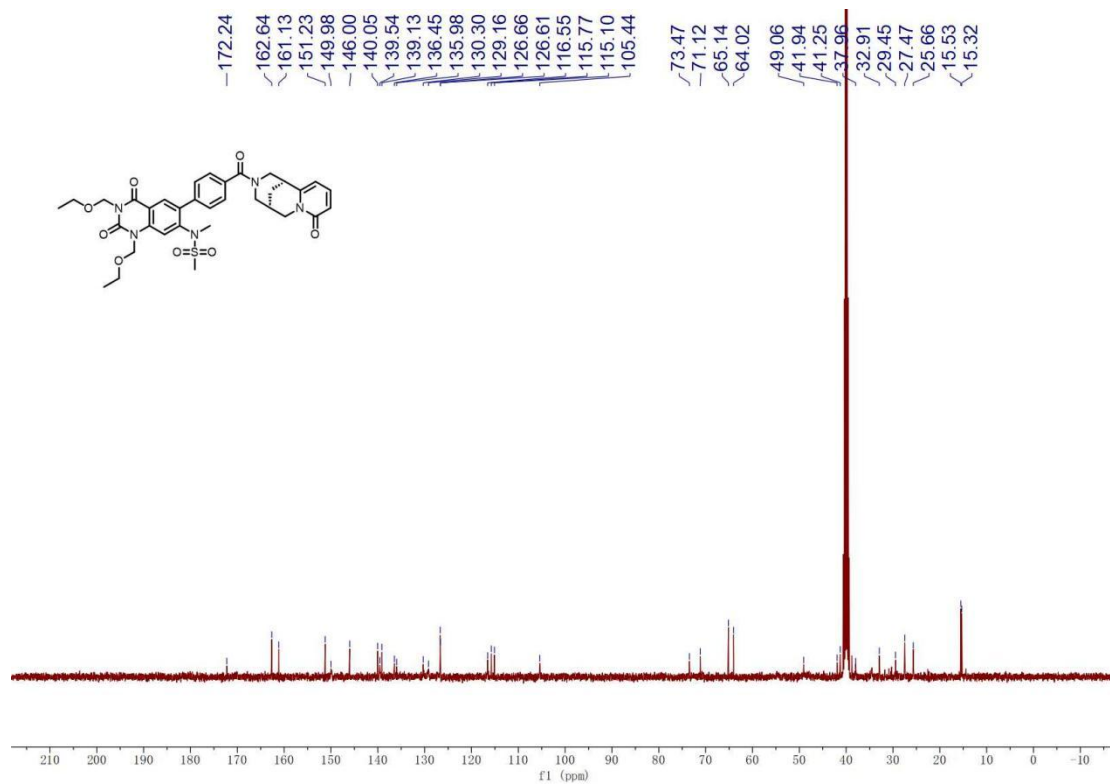

<sup>1</sup>H NMR (400 MHz, DMSO-*d*<sub>6</sub>) Spectra of **5**

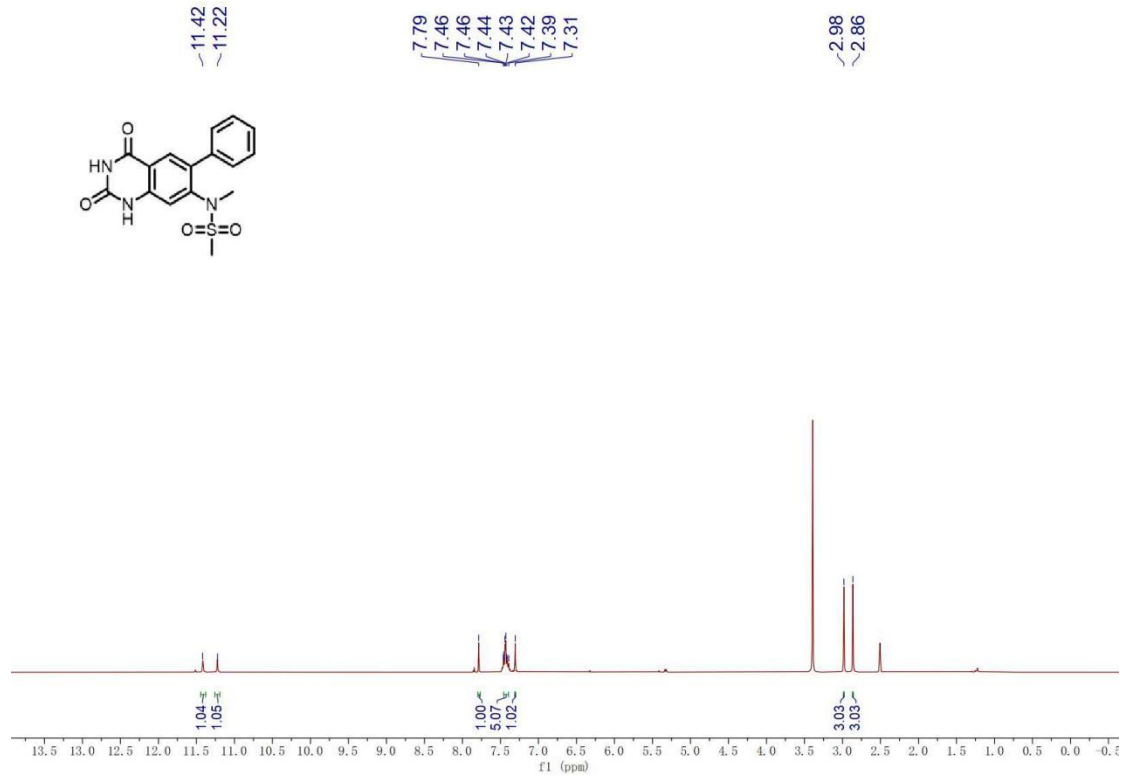

<sup>13</sup>C NMR (101 MHz, DMSO-*d*<sub>6</sub>) Spectra of **5**

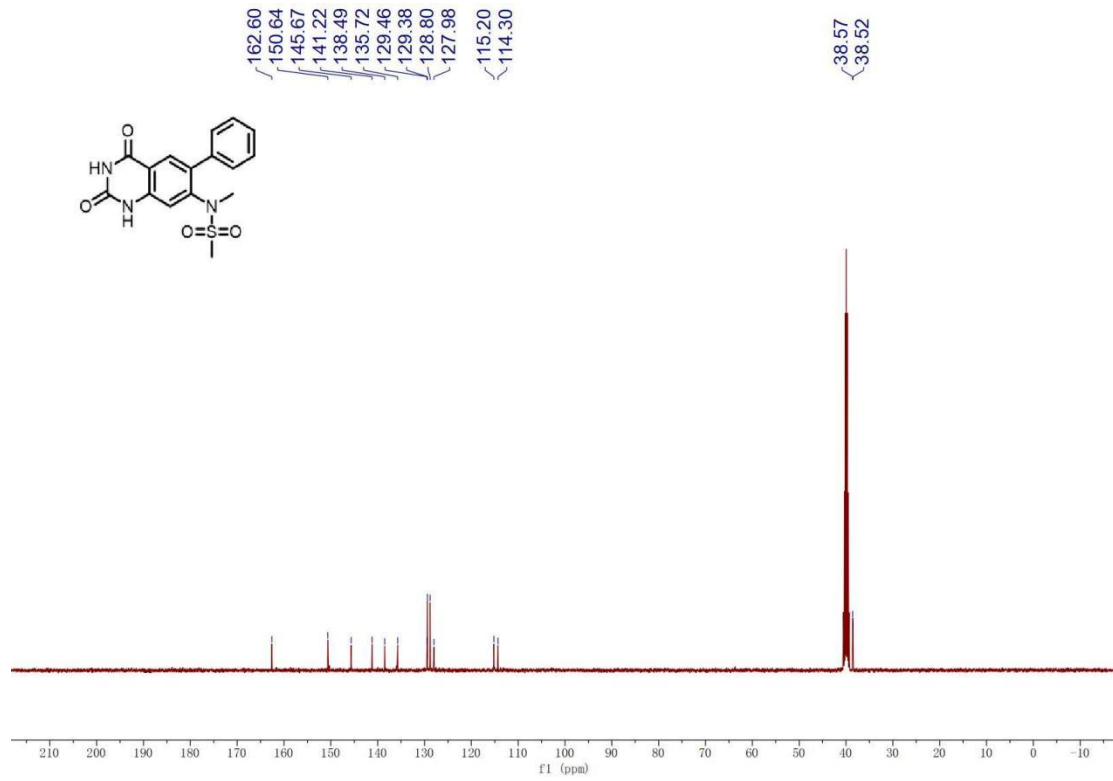

<sup>1</sup>H NMR (400 MHz, CDCl<sub>3</sub>) Spectra of 6

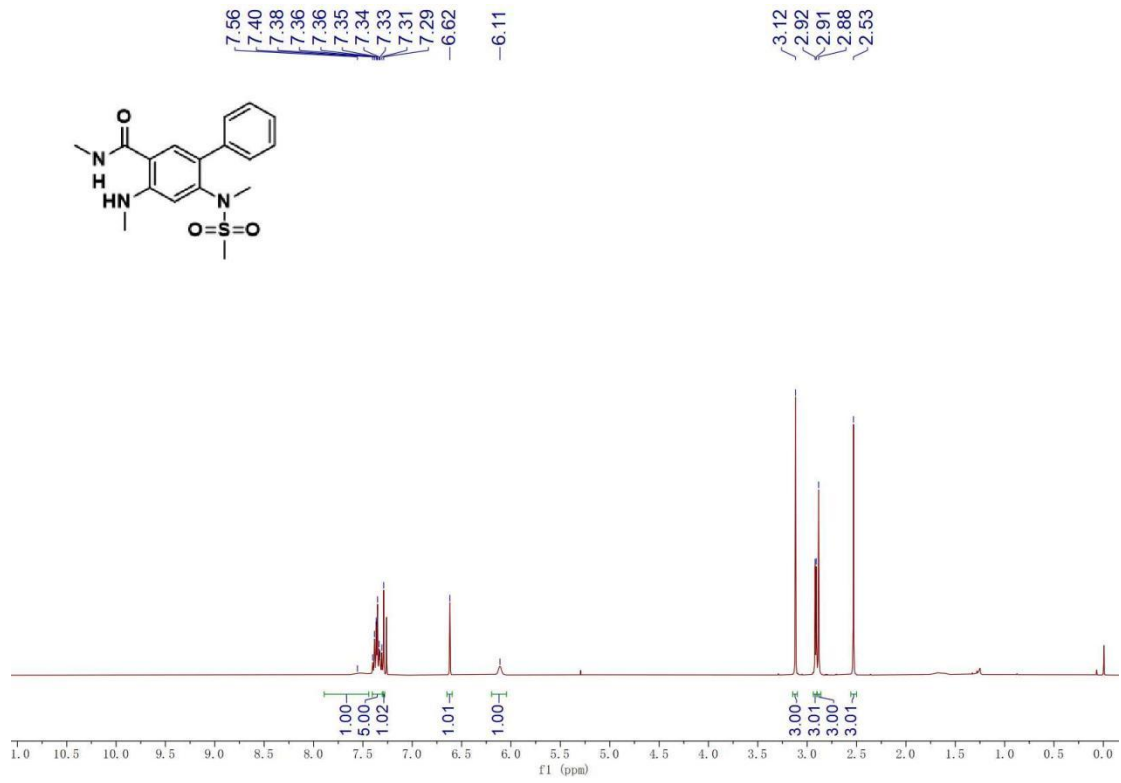

<sup>13</sup>C NMR (101 MHz, CDCl<sub>3</sub>) Spectra of 6

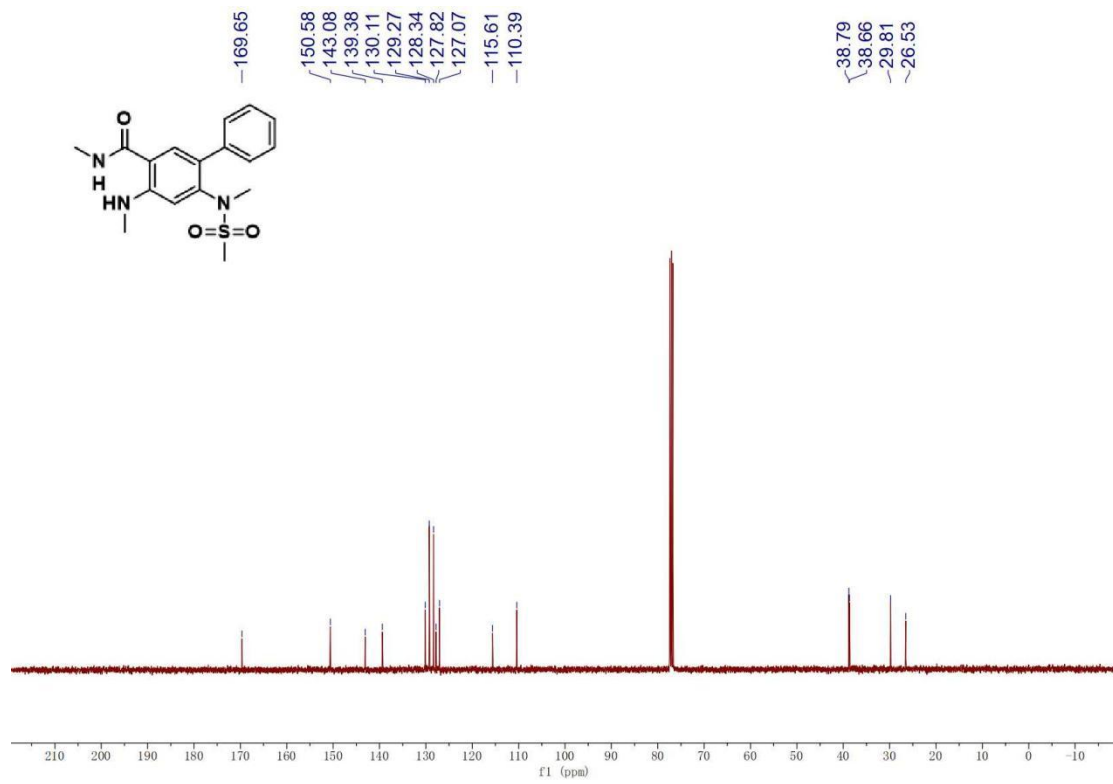

<sup>1</sup>H NMR (400 MHz, CDCl<sub>3</sub>) Spectra of 7

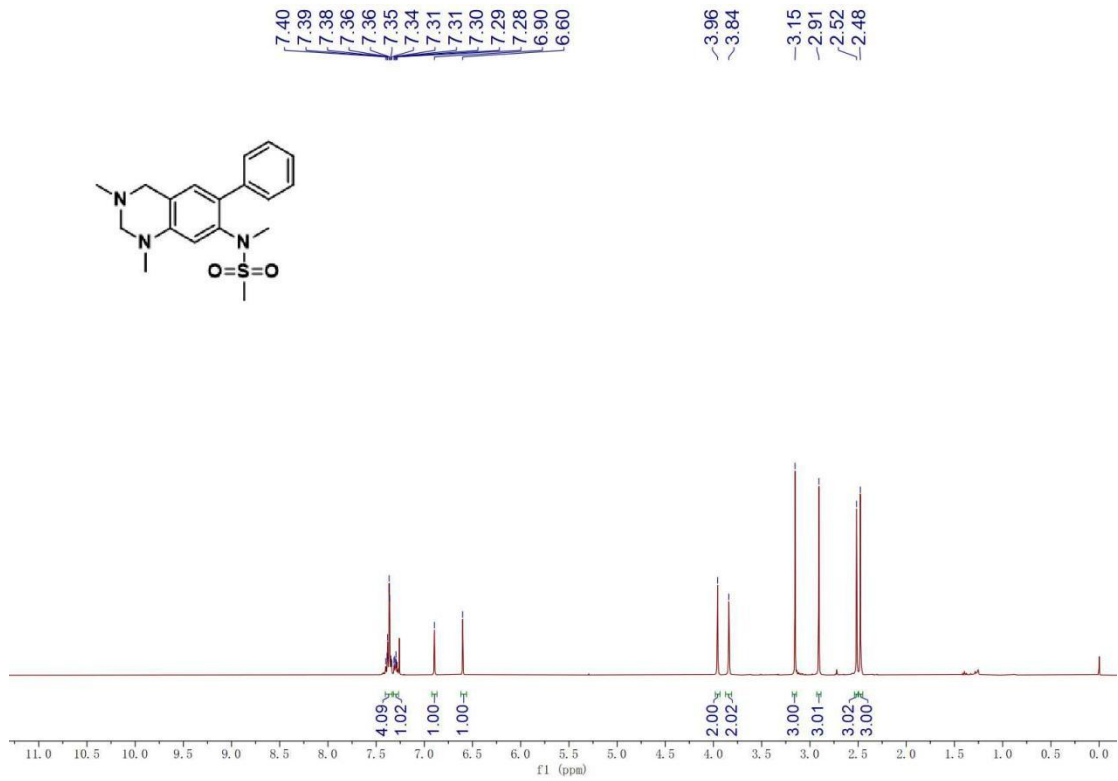

<sup>13</sup>C NMR (101 MHz, CDCl<sub>3</sub>) Spectra of 7

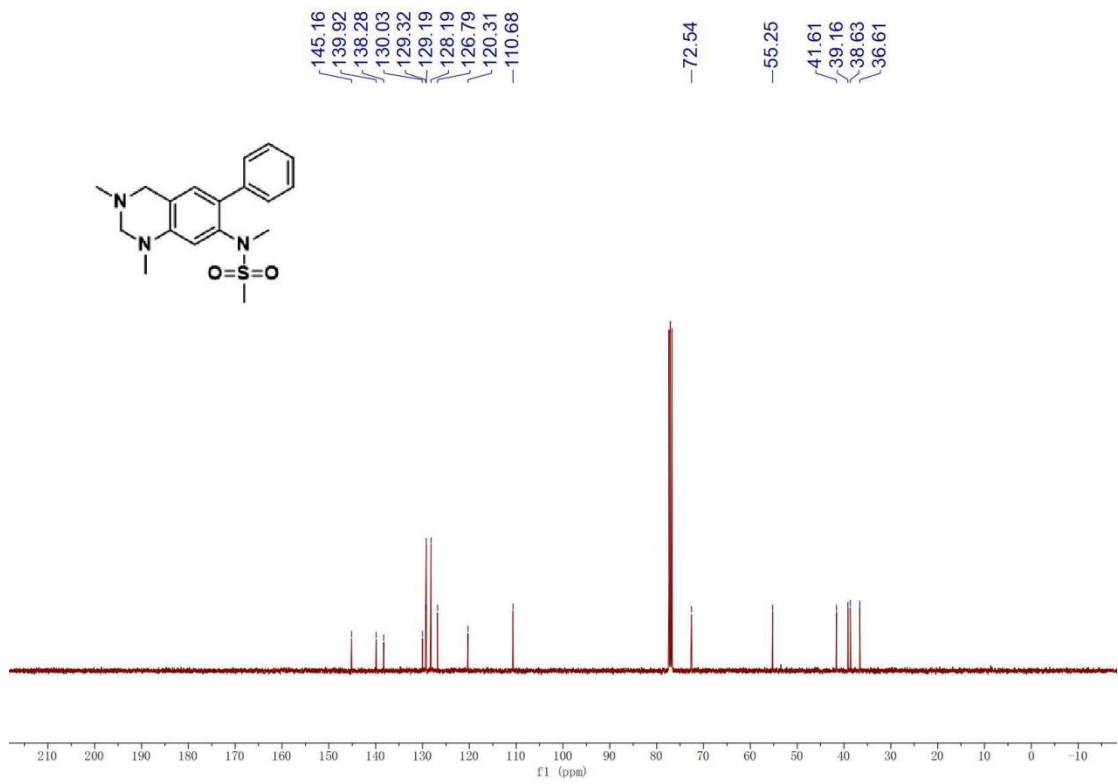

<sup>1</sup>H NMR (400 MHz, CDCl<sub>3</sub>) Spectra of **9**

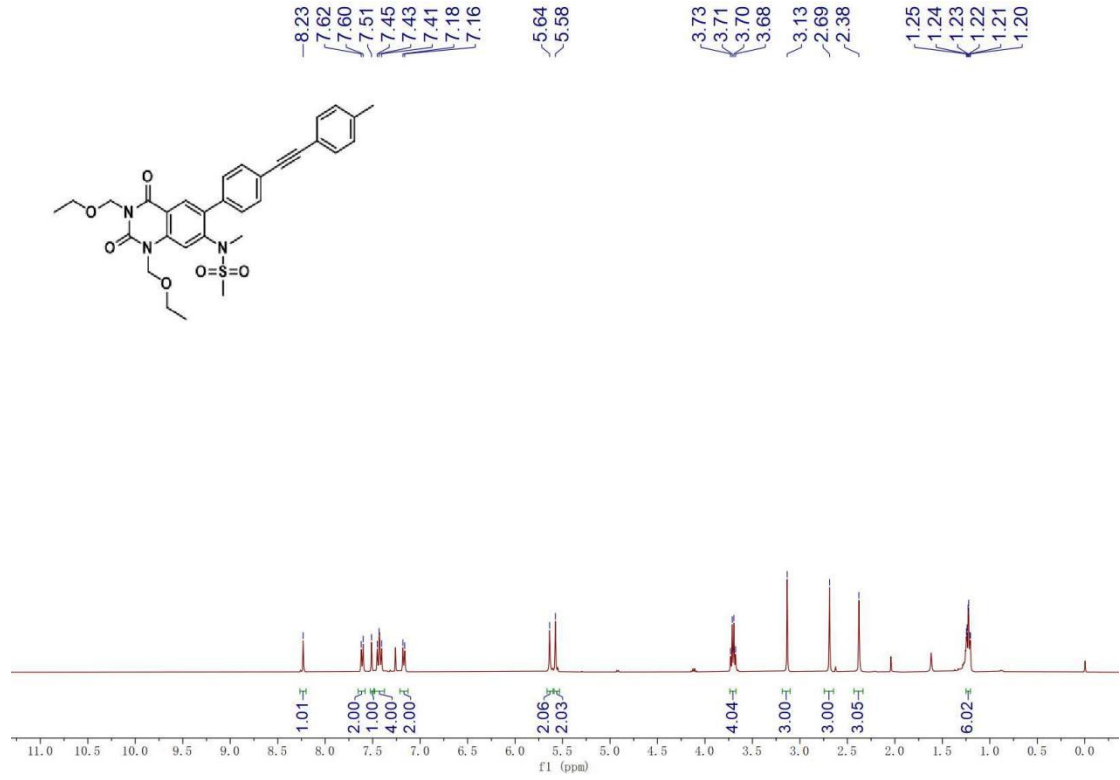

<sup>13</sup>C NMR (101 MHz, CDCl<sub>3</sub>) Spectra of **9**

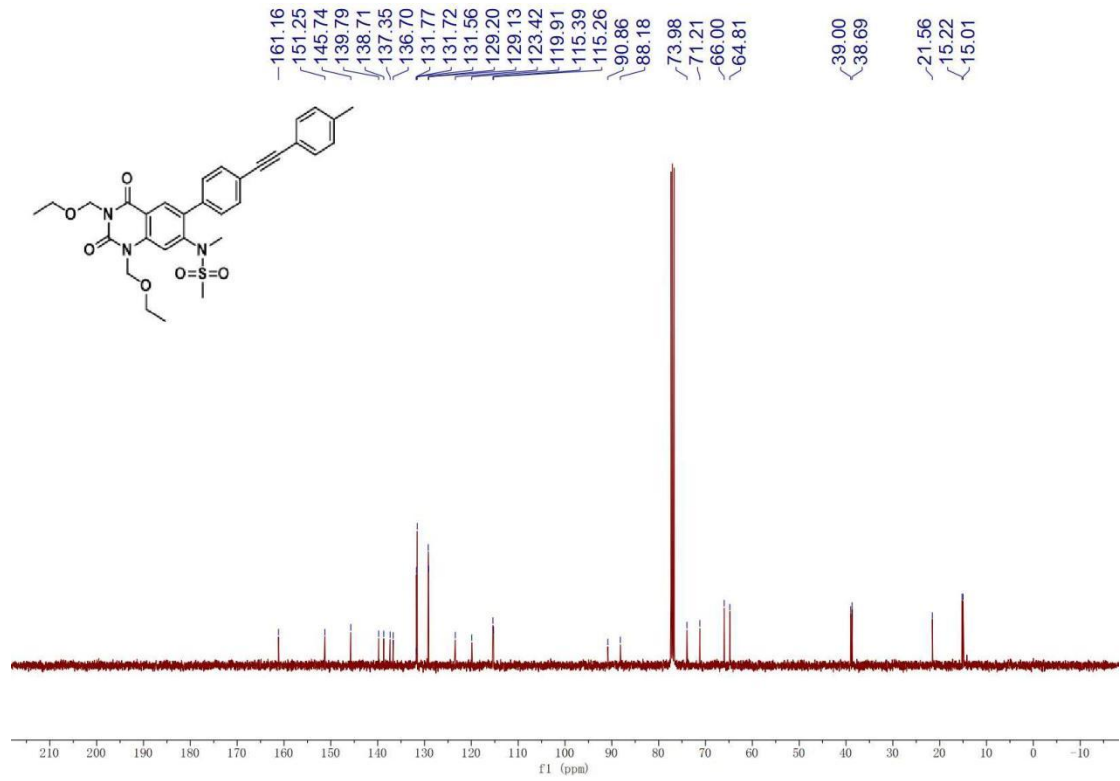

<sup>1</sup>H NMR (400 MHz, CDCl<sub>3</sub>) Spectra of **11a**

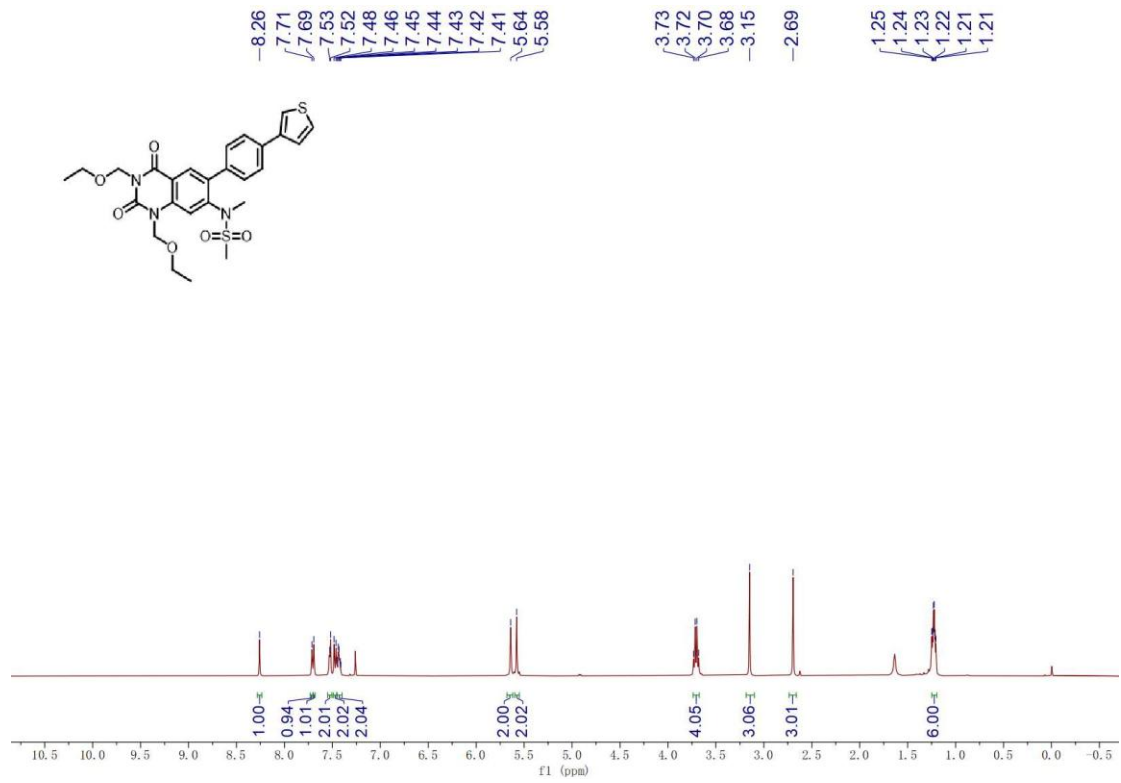

<sup>13</sup>C NMR (101 MHz, CDCl<sub>3</sub>) Spectra of **11a**

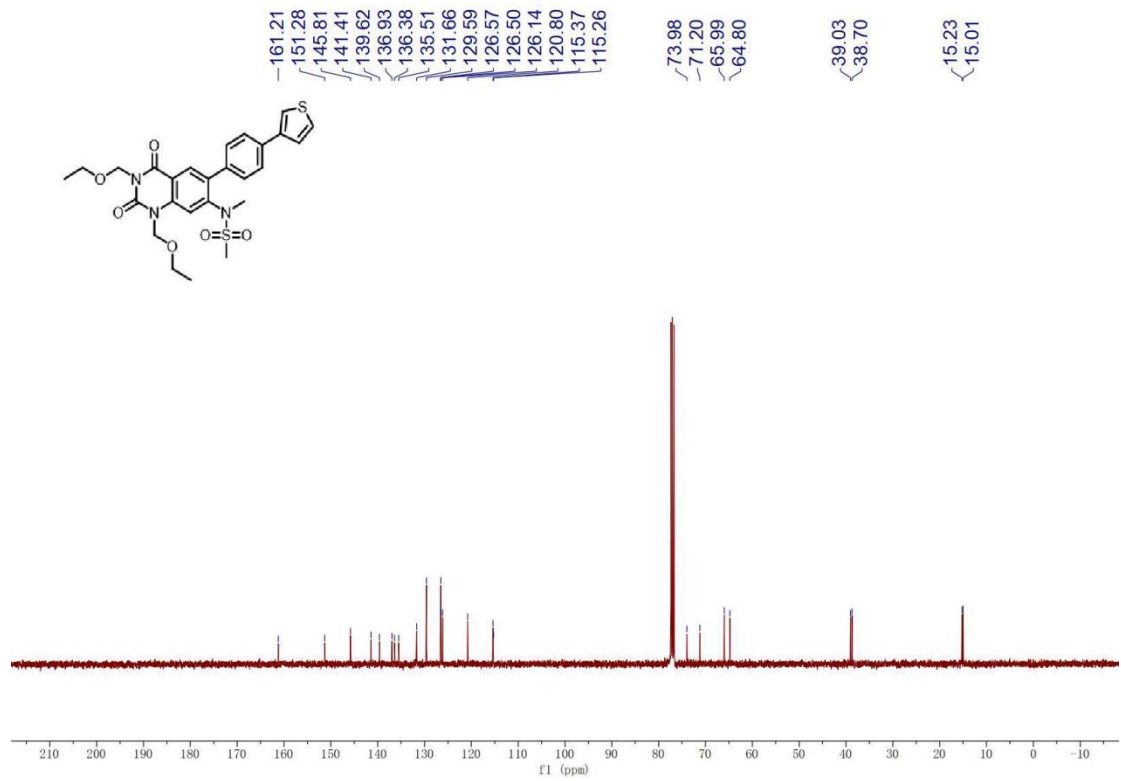

<sup>1</sup>H NMR (400 MHz, CDCl<sub>3</sub>) Spectra of **11b**

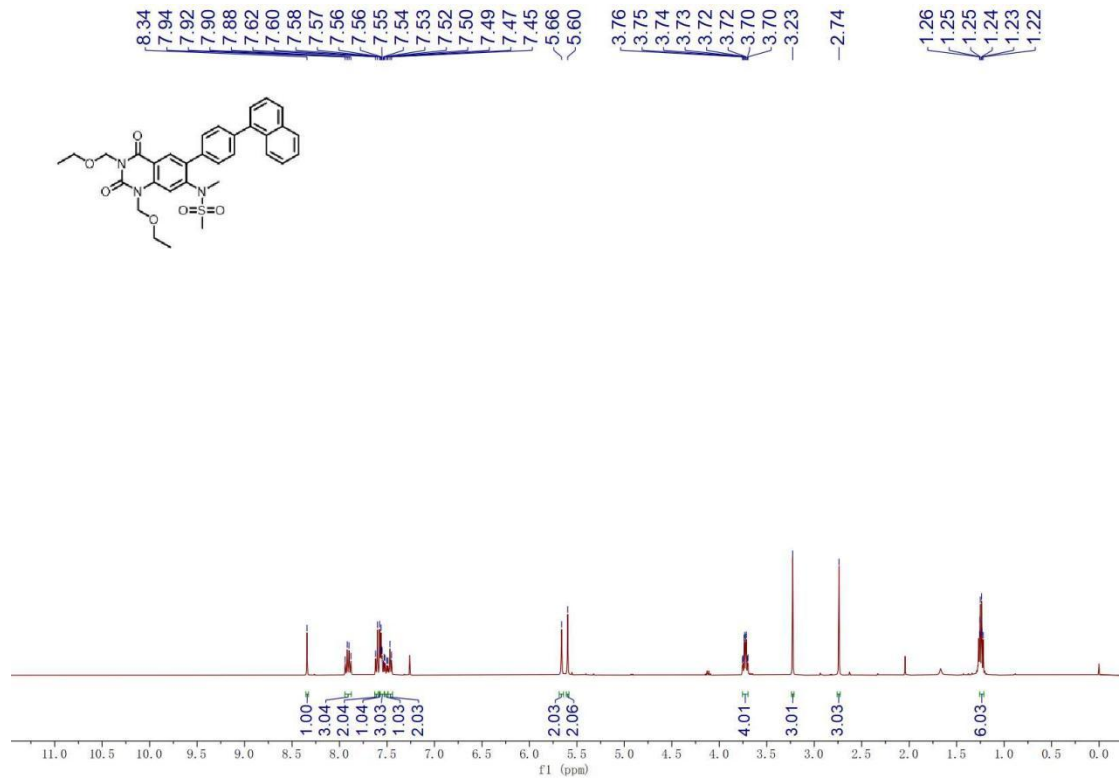

<sup>13</sup>C NMR (101 MHz, CDCl<sub>3</sub>) Spectra of **11b**

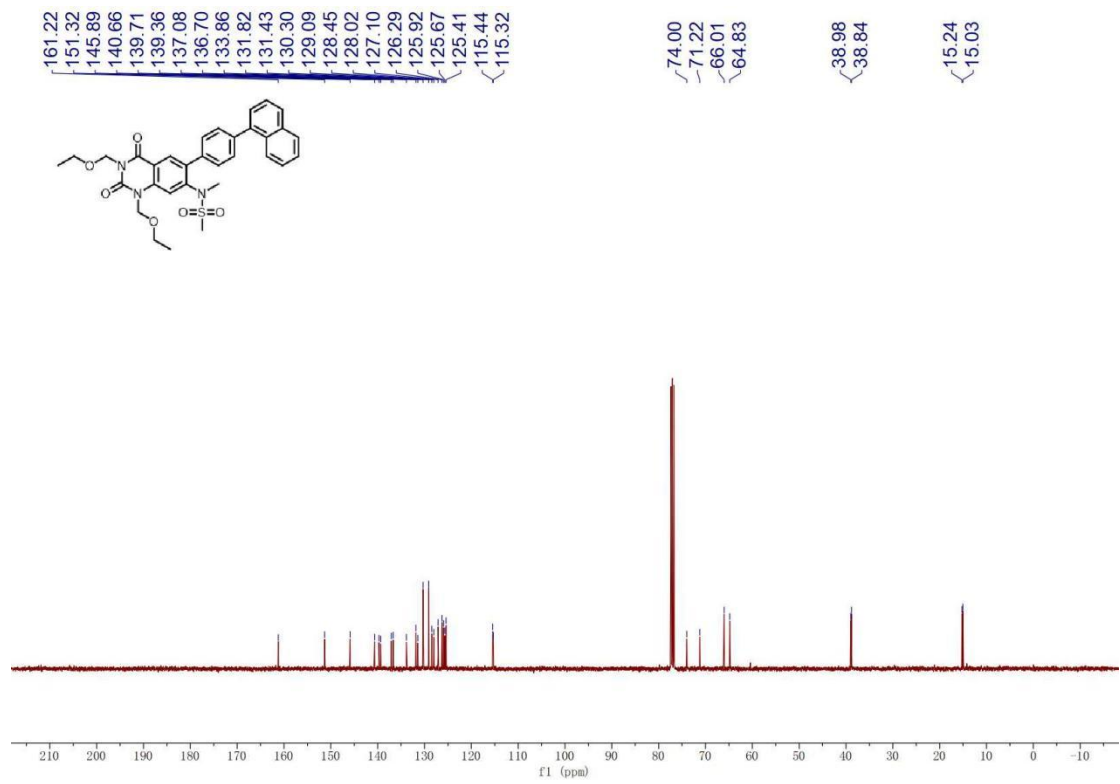

<sup>1</sup>H NMR (400 MHz, CDCl<sub>3</sub>) Spectra of **11c**

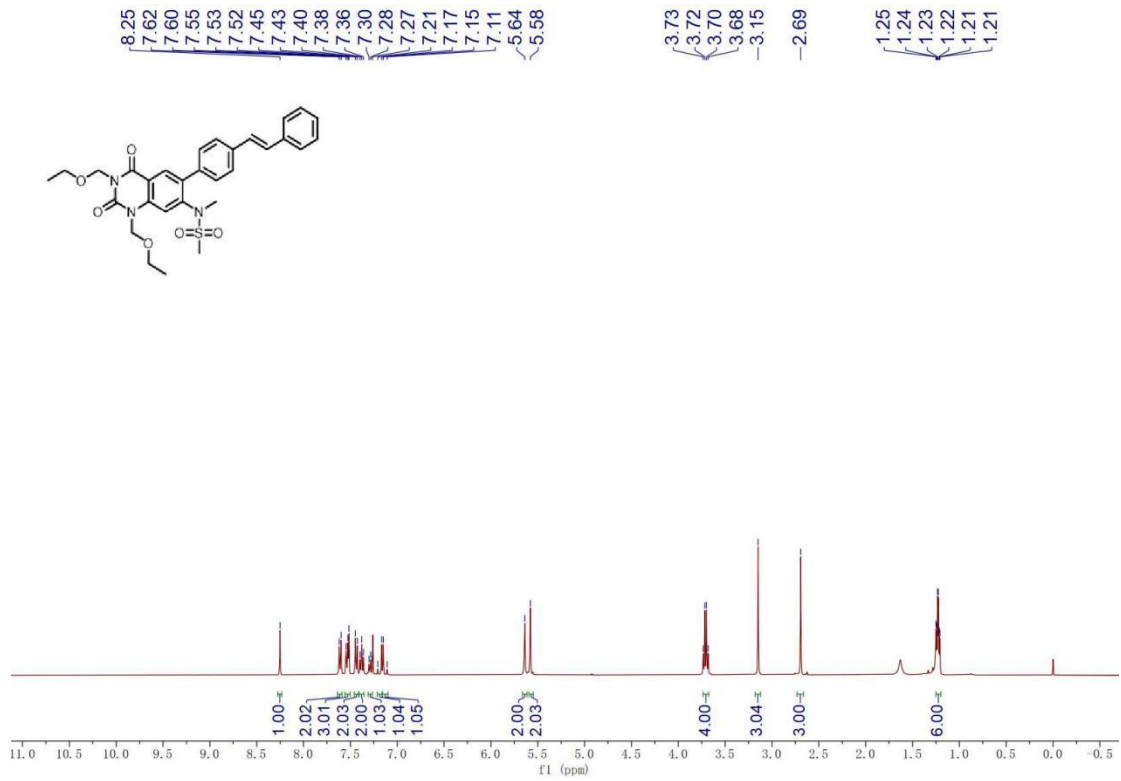

<sup>13</sup>C NMR (101 MHz, CDCl<sub>3</sub>) Spectra of **11c**

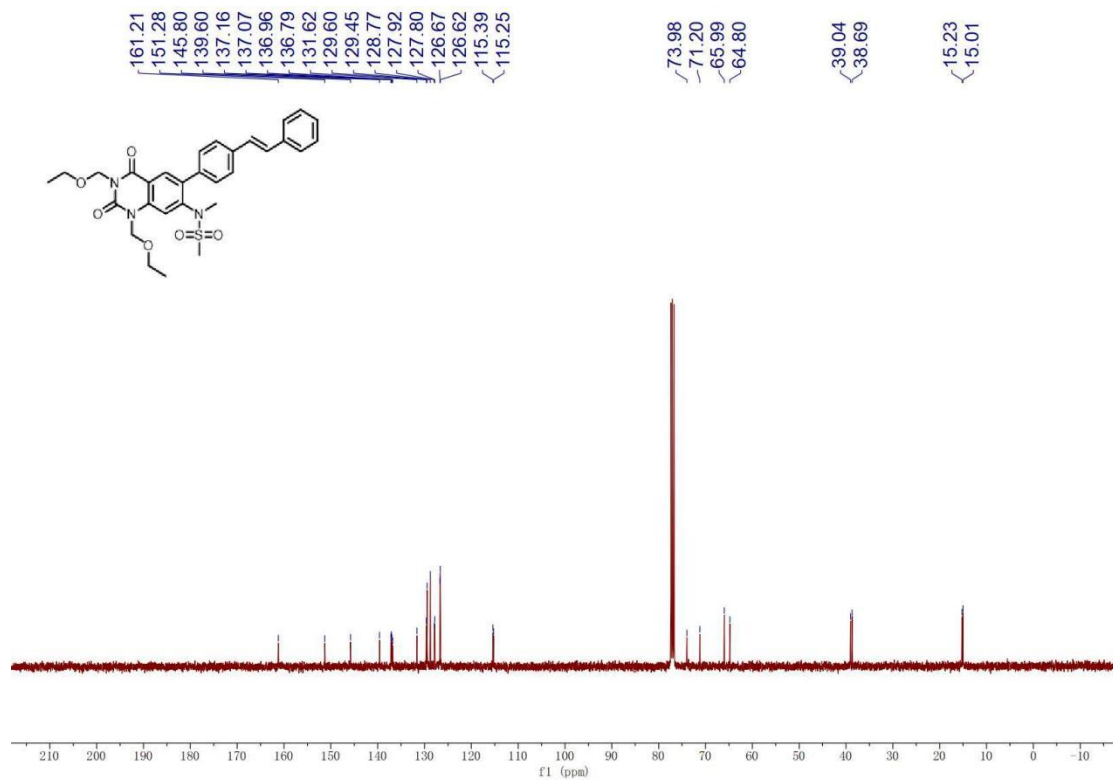

## 8 Reference

- [1] (a) Curti, C.; Rassa, G.; Lombardo, M.; Zambrano, V.; Pinna, L.; Battistini, L.; Sartori, A.; Pelosi, G.; Zanardi, F. *Angew. Chem., Int. Ed.* **2020**, *59*, 20055; (b) Saktura, M.; Frankowski, S.; Joachim, B.; Albrecht, L. *Synthesis* **2021**, *53*, 309; (c) Marcantonio, E.; Curti, C.; Battistini, L.; Sartori, A.; Cardinale, L.; Pelosi, G.; Zanardi, F. *Adv. Synth. Catal.* **2021**, *363*, 2625; (d) Li, J.; Liu, K.; Xu, S.; Tan, L.; Li, F.; Yang, M.; Zeng, Y.-F. Liu, X.; Chen, J.; Wang, Z. Catalyst- and Base-Free Synthesis of Pyridine-Fused Uracils from 6-Methyluracils, Aldehydes, and Ammonium Iodide via a One-Pot Multicomponent Reaction. *Org. Lett.* **2025**, *27*, 6716-6720.
- [2] (a) Kim NE, Lee SJ, Youn SW. Regiodivergent and Stereoselective Hydrothiolation of Ynamides. *Org Lett.* **2025**, *27*, 13115-13121. (b) Dutta S, Yang S, Vanjari R, Mallick RK, Gandon V, Sahoo AK. Keteniminium-Driven Umpolung Difunctionalization of Ynamides. *Angew Chem Int Ed Engl.* **2020**, *59*, 10785-10790. (c) Vanjari R, Dutta S, Yang S, Gandon V, Sahoo AK. Palladium-Catalyzed Regioselective Arylalkenylation of Ynamides. *Org Lett.* **2022**, *24*, 1524-1529. (d) Wang XN, Zhao Z, Chen J, Wang N, Chang J. Annulations of Ynamides with 1,2-Benzisothiazoles to Construct 1,4-Benzothiazepines and 3-Aminoisoquinolines. *Org Lett.* **2024**, *26*, 1522-1527.
- [3] Defrees, Shawn, Kalakota S. Reddy and John m. Cassady. "A Selective and Efficient Method for the Deprotection of N-Benzyloxymethyl (BOM) Protecting Groups from Pyrimidine and Dihydropyrimidine Ring Systems." *ChemInform.* **1988**, *19*.
- [4] Ghosh A, Shee S, Biju AT. A Benzannulation Strategy for Rapid Access to Quinazoline-2,4-diones via Oxidative N-Heterocyclic Carbene Catalysis. *Org Lett.* **2022**, *24*, 2772-2777.
- [5] Ha, w.; Shin, S. J.; Ji, Y. S.; Youn, S. W. KO<sup>t</sup>Bu-Promoted [4+2]-Annulation-Dehydration Cascade Enabling the Construction of Diverse 2-Pyridone-Fused Uracils. *Org. Lett.* **2024**, *26*, 10409-10413.
- [6] Hui, Wu. Wen, feng, Zhao. Nan, Jiang. Mao, Liu, Qing. Mei, Ge. Hang, Cong. [3 + 2] Cycloaddition of N-Amino(iso)quinolinium Salts with Vinylsulfonium Salt: Synthesis of Pyrazolo[1,5-a]quinoline and Pyrazolo[5,1-a]isoquinoline Derivatives. *J. Org. Chem.* **2025**, *90*, 6969-6979.
